# Supplementary material for: Evolutionary Conservation and Diversification of Puf RNA Binding Proteins and Their mRNA Targets
Source: PubMed Central journal article supplement (PMC4654594; doi:10.1371/journal.pbio.1002307), 2015-11-20
Supplement: pbio.1002307.s013.pdf [file pbio.1002307.s013.pdf]

**A**

*H. sapiens* vs. *M. musculus*  
(human) (mouse)

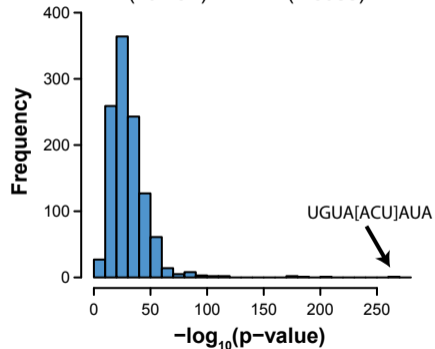**B**

*H. sapiens* vs. *D. rerio*  
(human) (zebrafish)

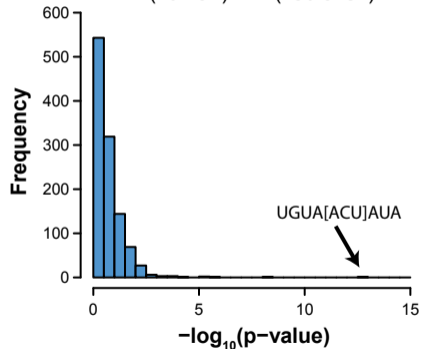**C**

*H. sapiens* vs. *D. melanogaster*  
(human) (fruit fly)

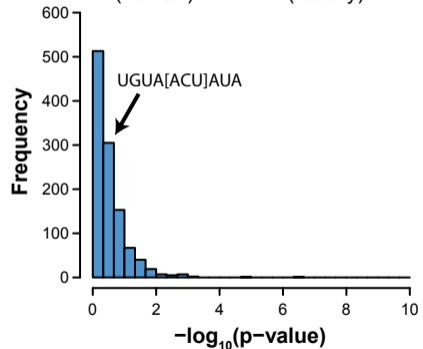

Supp. Figure 3
