# Supplementary material for: Evolutionary Conservation and Diversification of Puf RNA Binding Proteins and Their mRNA Targets
Source: PubMed Central journal article supplement (PMC4654594; doi:10.1371/journal.pbio.1002307), 2015-11-20
Supplement: pbio.1002307.s016.pdf [file pbio.1002307.s016.pdf]

**A****Overlap of Puf3 Target Sets (from IP data)**

|                                                    | <i>N. crassa</i><br>(this study)* | <i>S. cerevisiae</i><br>(this study) | <i>S. cerevisiae</i><br>(Gerber <i>et al.</i> ) |
|----------------------------------------------------|-----------------------------------|--------------------------------------|-------------------------------------------------|
| <b><i>N. crassa</i> (this study)*</b>              | (250)                             | 83                                   | 48                                              |
| <b><i>S. cerevisiae</i> (this study)</b>           | 83                                | (392)                                | 194                                             |
| <b><i>S. cerevisiae</i> (Gerber <i>et al.</i>)</b> | 48                                | 194                                  | (220)                                           |

**B**

|                                                                 | # RNAs | # with Motif Match |           |
|-----------------------------------------------------------------|--------|--------------------|-----------|
|                                                                 |        | Non-3' UTR         | 3' UTR    |
| <b><i>N. crassa</i> Puf3 Targets (this study)*</b>              | 250    | 47 (19%)           | 83 (33%)  |
| <b><i>S. cerevisiae</i> Puf3 Targets (this study)</b>           | 392    | 99 (25%)           | 241 (61%) |
| <b><i>S. cerevisiae</i> Puf3 Targets (Gerber <i>et al.</i>)</b> | 220    | 50 (23%)           | 159 (73%) |
| <b>All RNAs</b>                                                 | 6228   | 518 (8%)           | 710 (11%) |

\* - "targets" are RNAs bound by *N. crassa* Puf3 when ectopically expressed in *S. cerevisiae*
