# Supplementary material for: Evolutionary Conservation and Diversification of Puf RNA Binding Proteins and Their mRNA Targets
Source: PubMed Central journal article supplement (PMC4654594; doi:10.1371/journal.pbio.1002307), 2015-11-20
Supplement: pbio.1002307.s017.pdf [file pbio.1002307.s017.pdf]

**A**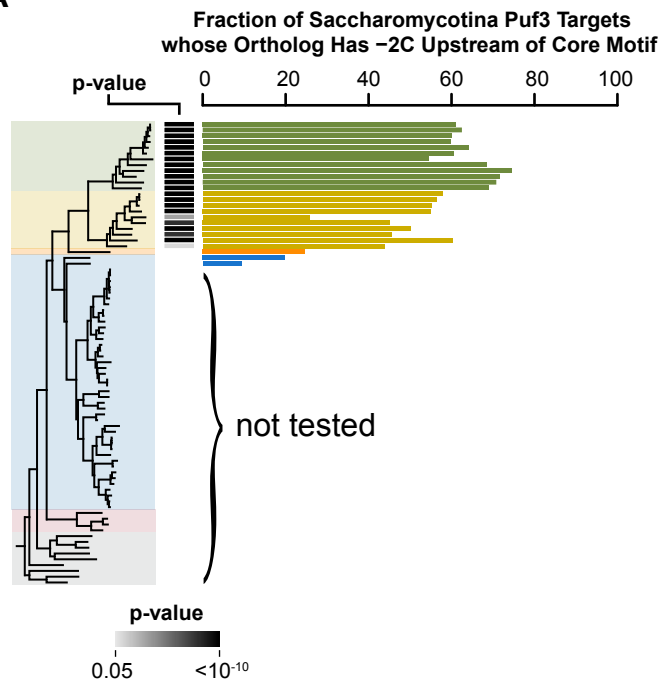

- Saccharomycetaceae
- CTG clade
- *Y. lipolytica*
- Pezizomycotina
- Schizosaccharomycetes
- Other Fungi

**B**

| Species                      | Target Group  | Non-target Group | -2C enrichment Odds-ratio | p-value* | Residues Aligned to <i>S. cerevisiae</i> -2C Contacts# |
|------------------------------|---------------|------------------|---------------------------|----------|--------------------------------------------------------|
| <i>S. cerevisiae</i>         | 141/231 (61%) | 135/801 (17%)    | 7.7                       | 8e-36    | K, LAS                                                 |
| <i>S. cerevisiae</i> RM11.1a | 140/224 (62%) | 129/730 (18%)    | 7.7                       | 1.8e-34  | ?                                                      |
| <i>S. paradoxus</i>          | 128/213 (60%) | 121/723 (17%)    | 7.5                       | 9.5e-32  | K, LAS                                                 |
| <i>S. mikatae</i>            | 116/194 (60%) | 96/612 (16%)     | 8                         | 8.1e-30  | K, LAS                                                 |
| <i>S. kudriavzevii</i>       | 109/170 (64%) | 101/511 (20%)    | 7.2                       | 2.4e-24  | ?                                                      |
| <i>S. bayanus</i>            | 129/213 (61%) | 110/741 (15%)    | 8.8                       | 2.1e-36  | K, LAS                                                 |
| <i>C. glabrata</i>           | 121/222 (55%) | 80/477 (17%)     | 5.9                       | 3e-22    | R, LAS                                                 |
| <i>S. castellii</i>          | 132/193 (68%) | 78/476 (16%)     | 11                        | 1.4e-36  | R, LAS                                                 |
| <i>K. waltii</i>             | 135/181 (75%) | 69/285 (24%)     | 9.1                       | 7.4e-26  | R, LAS                                                 |
| <i>S. kluyveri</i>           | 161/225 (72%) | 103/489 (21%)    | 9.4                       | 1.1e-36  | R, LAS                                                 |
| <i>K. lactis</i>             | 160/226 (71%) | 108/559 (19%)    | 10                        | 9.1e-41  | R, LAS                                                 |
| <i>E. gossypii</i>           | 113/164 (69%) | 64/339 (19%)     | 9.5                       | 2.1e-26  | R, LAS                                                 |
| <i>C. albicans</i> WO1       | 130/225 (58%) | 60/461 (13%)     | 9.1                       | 3.7e-32  | K, LAS                                                 |
| <i>C. albicans</i> SC5314    | 129/229 (56%) | 64/486 (13%)     | 8.5                       | 7.3e-31  | K, LAS                                                 |
| <i>C. dubliniensis</i>       | 127/230 (55%) | 61/467 (13%)     | 8.2                       | 1.9e-29  | K, LAS                                                 |
| <i>C. tropicalis</i>         | 126/229 (55%) | 64/455 (14%)     | 7.4                       | 5.1e-27  | K, LAS                                                 |
| <i>L. elongisporus</i>       | 51/198 (26%)  | 54/483 (11%)     | 2.8                       | 1e-04    | K, LAS                                                 |
| <i>C. parapsilosis</i>       | 88/195 (45%)  | 52/288 (18%)     | 3.7                       | 6.4e-09  | G, --S or G, KKS                                       |
| <i>D. hansenii</i>           | 105/230 (46%) | 106/480 (22%)    | 3                         | 7.7e-09  | K, LAS                                                 |
| <i>P. stipitis</i>           | 122/243 (50%) | 68/447 (15%)     | 5.6                       | 1.2e-20  | K, LAS                                                 |
| <i>C. guilliermondii</i>     | 68/155 (44%)  | 39/156 (25%)     | 2.3                       | 0.013    | K, LAS                                                 |
| <i>C. lusitanae</i>          | 118/196 (60%) | 41/179 (23%)     | 5.1                       | 6.5e-12  | K, LAS                                                 |
| <i>Y. lipolytica</i>         | 46/186 (25%)  | 91/522 (17%)     | 1.6                       | 0.99     | K, LAS                                                 |
| <i>A. oligospora</i>         | 29/146 (20%)  | 48/312 (15%)     | 1.4                       | 1        | K, LNA                                                 |
| <i>T. melanosporum</i>       | 4/43 (9.3%)   | 31/137 (23%)     | 0.35                      | 1        | R, INA                                                 |

\* - Bonferroni corrected

# - *S. cerevisiae* -2C contacting residues are 819, 864-866
