# Supplementary material for: Evolutionary Conservation and Diversification of Puf RNA Binding Proteins and Their mRNA Targets
Source: PubMed Central journal article supplement (PMC4654594; doi:10.1371/journal.pbio.1002307), 2015-11-20

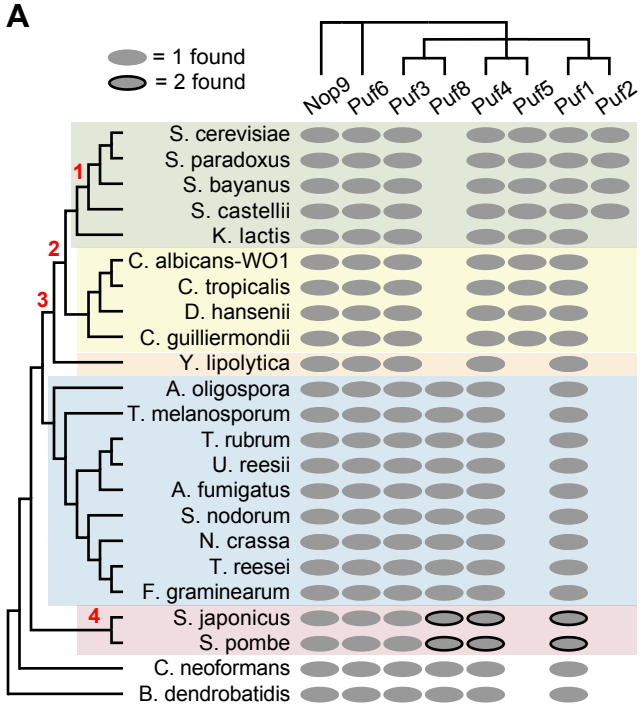

- 1 - Puf1 duplicated (origin of Puf2)  
 2 - Puf4 duplicated (origin of Puf5)  
 3 - Puf8 deleted  
 4 - Puf4, Puf8, Puf1 each duplicated

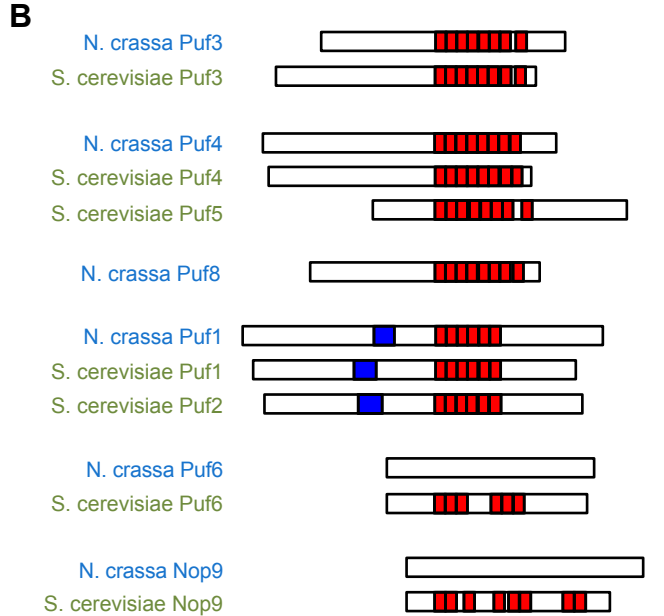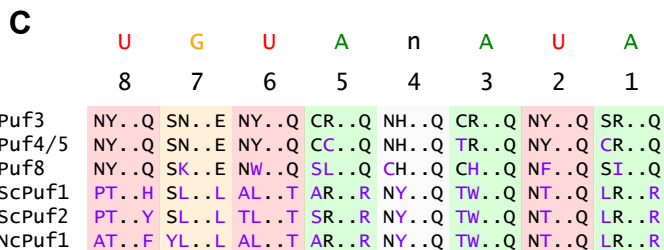

Supplement: pbio.1002307.s020.pdf [file pbio.1002307.s020.pdf]
