# Supplementary material for: Evolutionary Conservation and Diversification of Puf RNA Binding Proteins and Their mRNA Targets
Source: PubMed Central journal article supplement (PMC4654594; doi:10.1371/journal.pbio.1002307), 2015-11-20
Supplement: pbio.1002307.s021.pdf [file pbio.1002307.s021.pdf]

**A**

In-group: ***S. cerevisiae* Puf3 targets**  
 Species Used: **post-WGD yeast (n = 8)**  
 Number of 3' UTRs: **1534**

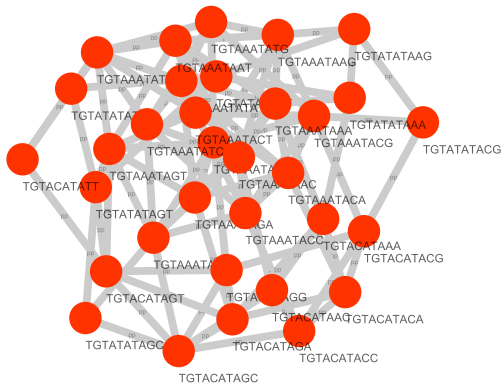

**Key**

|               | # of unique 10mers | # of UTRs matching 10mers | IUPAC expression |
|---------------|--------------------|---------------------------|------------------|
|               | 33                 | 1039                      | TGTAHATA         |
| Orphan 10mers | 15                 | 51                        |                  |

**B**

In-group: ***S. cerevisiae* Puf4 targets**  
 Species Used: **post-WGD yeast (n = 8)**  
 Number of 3' UTRs: **1399**

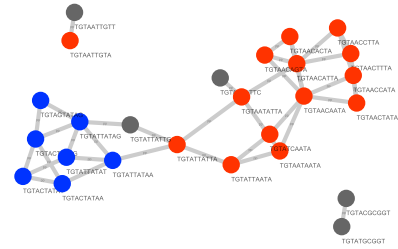

**Key**

|               | # of unique 10mers | # of UTRs matching 10mers | IUPAC expression |
|---------------|--------------------|---------------------------|------------------|
|               | 8                  | 167                       | TGTABTATA        |
|               | 14                 | 368                       | TGTAWYWWTA       |
| Subtotal      | 22                 | 535                       |                  |
| Orphan 10mers | 24                 | 119                       |                  |

**C**

In-group: ***S. cerevisiae* Puf5 targets**  
 Species Used: **post-WGD yeast (n = 8)**  
 Number of 3' UTRs: **1343**

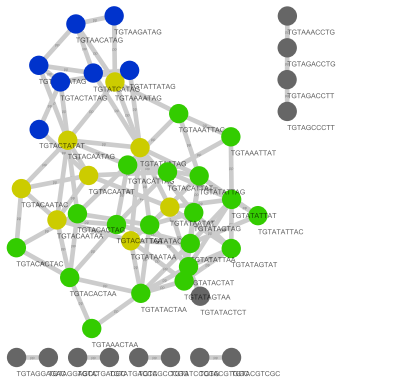

**Key**

|               | # of unique 10mers | # of UTRs matching 10mers | IUPAC expression |
|---------------|--------------------|---------------------------|------------------|
|               | 19                 | 359                       | TGTAHANTA        |
|               | 8                  | 202                       | TGTAHAHTA        |
|               | 7                  | 71                        | TGTAHHATA        |
| Subtotal      | 34                 | 632                       |                  |
| Orphan 10mers | 32                 | 116                       |                  |

**D**

In-group: **Saccharomycotina Puf3 targets**  
 Species Used: **Leotiomyceta (n = 42)**  
 Number of 3' UTRs: **8418**

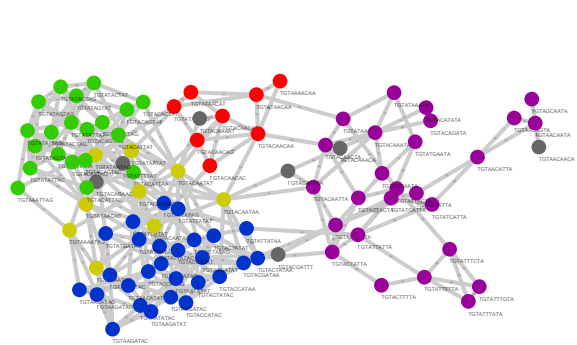

**Key**

|               | # of unique 10mers | # of UTRs matching 10mers | IUPAC expression |
|---------------|--------------------|---------------------------|------------------|
|               | 20                 | 1046                      | TGTAHANTA        |
|               | 9                  | 714                       | TGTAHNATA        |
|               | 27                 | 1550                      | TGTAHANTA        |
|               | 8                  | 225                       | TGTAYAACA        |
|               | 26                 | 1067                      | TGTAHNWNTA       |
| Subtotal      | 88                 | 4602                      |                  |
| Orphan 10mers | 10                 | 215                       |                  |
