# Supplementary material for: Evolutionary Conservation and Diversification of Puf RNA Binding Proteins and Their mRNA Targets
Source: PubMed Central journal article supplement (PMC4654594; doi:10.1371/journal.pbio.1002307), 2015-11-20
Supplement: pbio.1002307.s022.pdf [file pbio.1002307.s022.pdf]

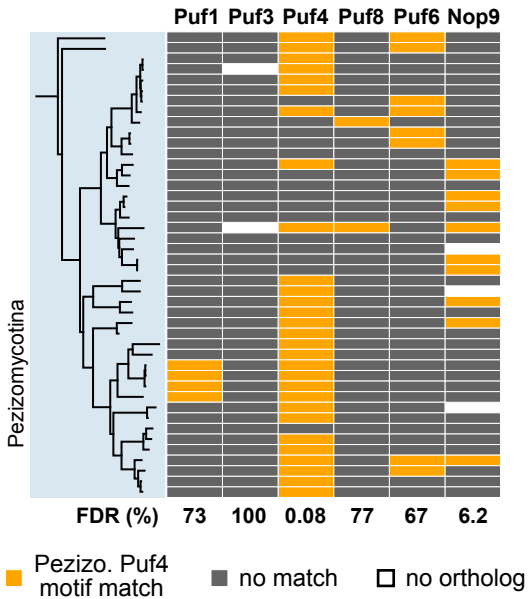

**Supp. Figure 12**
