# Supplementary material for: Evolutionary Conservation and Diversification of Puf RNA Binding Proteins and Their mRNA Targets
Source: PubMed Central journal article supplement (PMC4654594; doi:10.1371/journal.pbio.1002307), 2015-11-20
Supplement: pbio.1002307.s023.pdf [file pbio.1002307.s023.pdf]

## Carbon Source

## Linear Growth Rate

## Relative Growth Rate

Sucrose

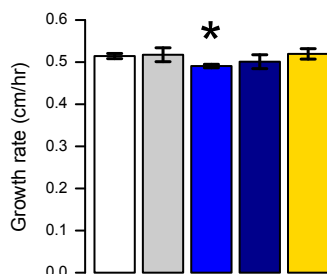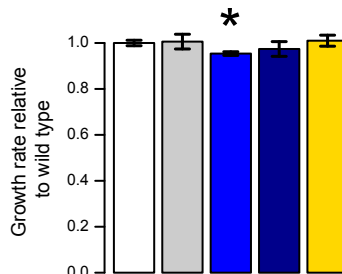

Glucose

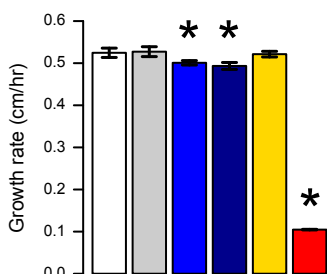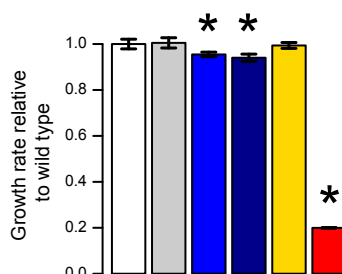

Maltose

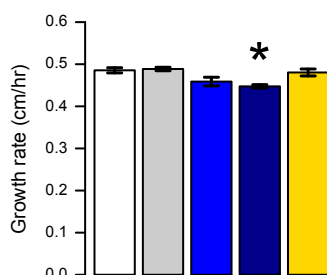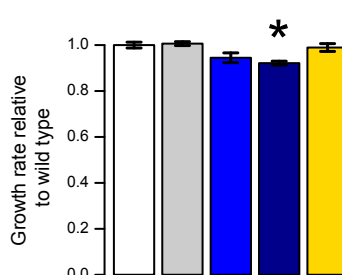

Glycerol

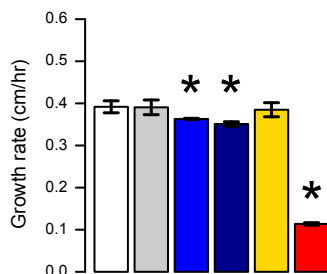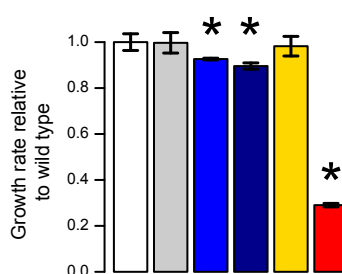\* -  $p < 0.05$  (two-sided t-test)

□ wild-type (74-OR23-1VA)

■ Puf4 partial KO (NCU1774.2)

■ Puf3 KO (NCU06511.2)

■ Puf8 KO (NCU01760.2)

■ Puf4 partial KO (NCU1775.2)

■ Puf1 KO (NCU06199.2)
