# Supplementary material for: Evolutionary Conservation and Diversification of Puf RNA Binding Proteins and Their mRNA Targets
Source: PubMed Central journal article supplement (PMC4654594; doi:10.1371/journal.pbio.1002307), 2015-11-20
Supplement: pbio.1002307.s024.pdf [file pbio.1002307.s024.pdf]

Percent of Saccharomycotina  
Puf3 Target Orthologs with  
Peizomycotina Puf4 Binding Site

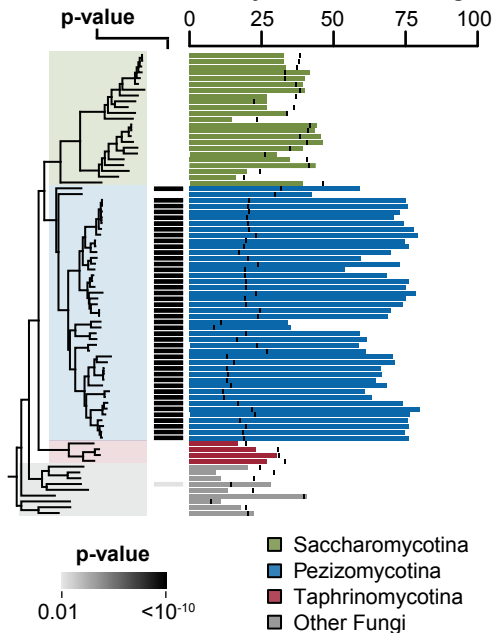

Supp. Figure 14
