# Supplementary material for: Evolutionary Conservation and Diversification of Puf RNA Binding Proteins and Their mRNA Targets
Source: PubMed Central journal article supplement (PMC4654594; doi:10.1371/journal.pbio.1002307), 2015-11-20

**A****Subsets of Saccharomycotina Puf3 (S) or Leotiomyceta Puf4 (L) Targets**

Targets divided into subsets based on overlap with each other.

|                                     | S-I | S-II | S-III | S-total | L-I | L-II | L-III | L-total |
|-------------------------------------|-----|------|-------|---------|-----|------|-------|---------|
| <b>Sacch. Puf3 Targets</b>          | +   | +    | +     | +       | +   | -    | n/a   | +/-     |
| <b>Leotio. Puf4 Targets</b>         | +   | -    | n/a   | +/-     | +   | +    | +     | +       |
| <b>Puf3 Targets (Gerber et al.)</b> | 95  | 9    | 43    | 147     | 95  | 8    | n/a   | 103     |
| <b>Leotio. Puf3 Targets</b>         | 24  | 2    | n/a   | 26      | 24  | 25   | 23    | 72      |
| <b>Mitochondrial Protein</b>        | 162 | 27   | 67    | 256     | 150 | 69   | 78    | 297     |
| <b>Size</b>                         | 164 | 38   | 74    | 276     | 164 | 243  | 198   | 605     |

**B**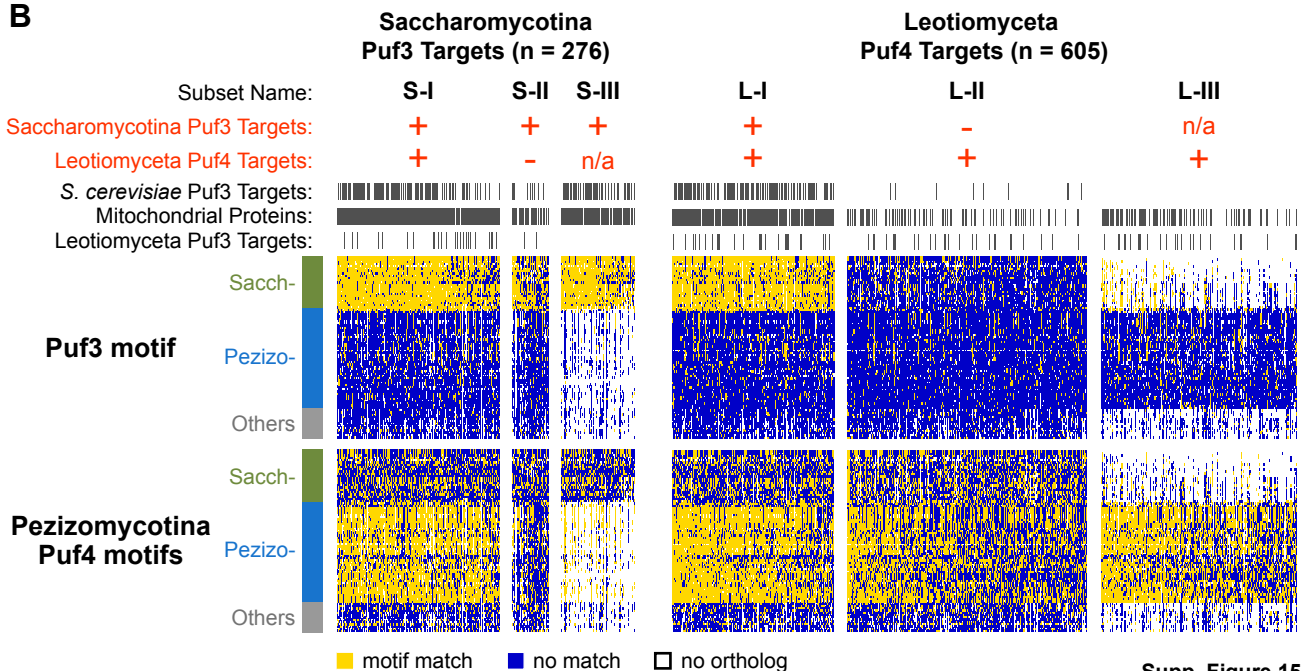

Supplement: pbio.1002307.s025.pdf [file pbio.1002307.s025.pdf]
