# Supplementary material for: Evolutionary Conservation and Diversification of Puf RNA Binding Proteins and Their mRNA Targets
Source: PubMed Central journal article supplement (PMC4654594; doi:10.1371/journal.pbio.1002307), 2015-11-20
Supplement: pbio.1002307.s026.pdf [file pbio.1002307.s026.pdf]

A

Number of RNAs with motif matches in “ancestral Puf3 targets”

|                       | Puf3 and Puf4* | Puf3 only | Puf4 only* | neither | odds-ratio (95% CI) | p-value |
|-----------------------|----------------|-----------|------------|---------|---------------------|---------|
| <i>D. stenobrocha</i> | 38             | 71        | 10         | 15      | 0.80 (0.32 - 2.01)  | 0.65    |
| <i>D. haptotyla</i>   | 46             | 63        | 16         | 24      | 1.09 (0.51 - 2.32)  | 0.85    |
| <i>A. oligospora</i>  | 49             | 74        | 9          | 19      | 1.39 (0.56 - 3.58)  | 0.52    |

\* The Puf4 submotif UGUA[ACU].[AU].UA was removed from this analysis to prevent overlap with the Puf3 motif.

B

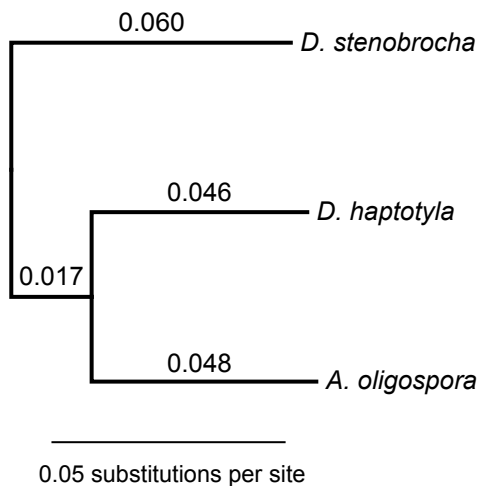

C

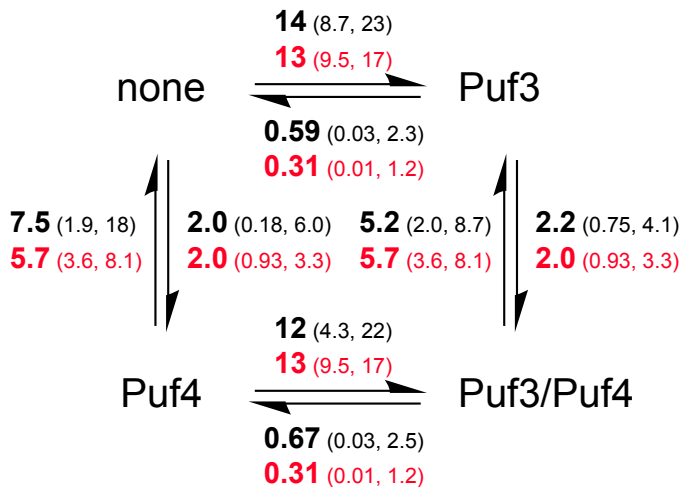

■ rates in “dependence” model

■ rates in “independence” model

median rate (95% credible interval)

#### Comparing Model Likelihoods:

$\log[\text{harmonic mean}(\text{dependence model})] = -242.2$

$\log[\text{harmonic mean}(\text{independence model})] = -234.5$

$\log \text{ Bayes Factor} = 2 * (-242.2 - -234.5) = -15$

$\log \text{ Bayes Factor} < 0$ , favoring **independence model**
