# Supplementary material for: Evolutionary Conservation and Diversification of Puf RNA Binding Proteins and Their mRNA Targets
Source: PubMed Central journal article supplement (PMC4654594; doi:10.1371/journal.pbio.1002307), 2015-11-20

**A****Conserved Targets of Saccharomycotina Puf3 (n = 276)**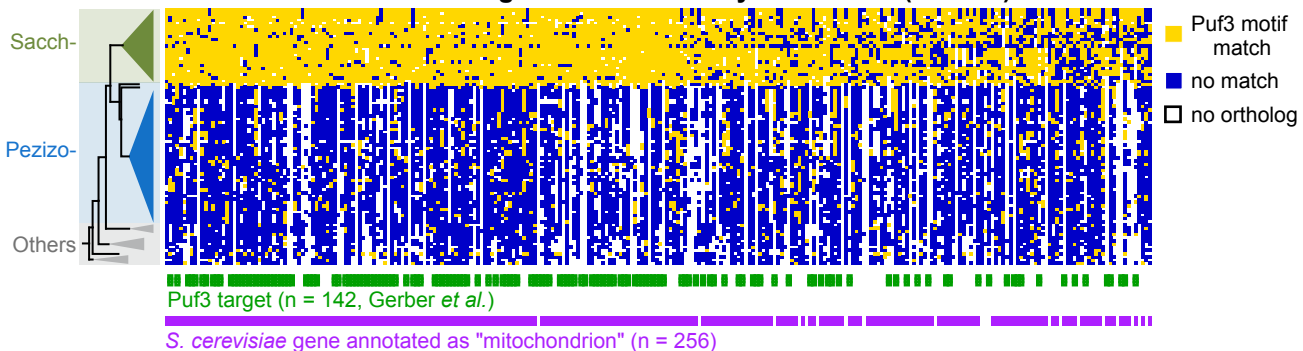**B**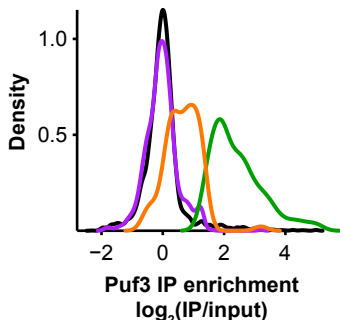**C**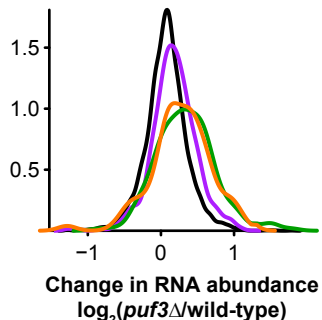**D**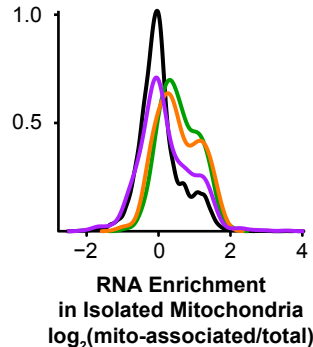**E**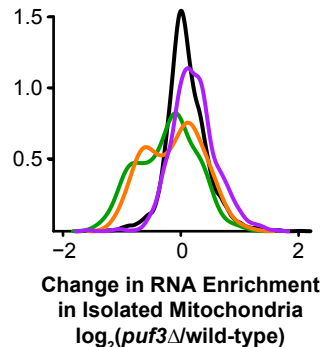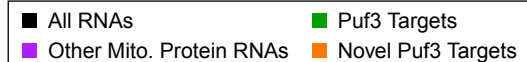

Supplement: pbio.1002307.s028.pdf [file pbio.1002307.s028.pdf]
