# Supplementary material for: Evolutionary Conservation and Diversification of Puf RNA Binding Proteins and Their mRNA Targets
Source: PubMed Central journal article supplement (PMC4654594; doi:10.1371/journal.pbio.1002307), 2015-11-20
Supplement: pbio.1002307.s030.pdf [file pbio.1002307.s030.pdf]

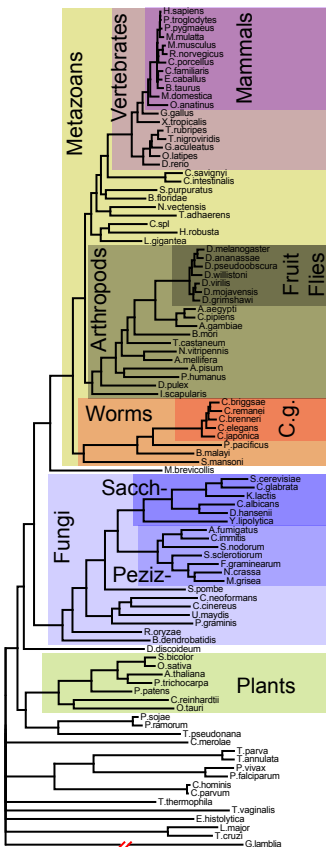

— 0.2 substitutions per site

// break of 0.5

Sacch- = Saccharomycotina fungi

Peziz- = Pezizomycotina fungi

C.g. = Caenorhabditis genus of worms
