# Supplementary material for: Evolutionary Conservation and Diversification of Puf RNA Binding Proteins and Their mRNA Targets
Source: PubMed Central journal article supplement (PMC4654594; doi:10.1371/journal.pbio.1002307), 2015-11-20

**Gain Then Loss:**

Binding sites for Puf3 gained in ancestor of Saccharomycotina and Pezizomycotina

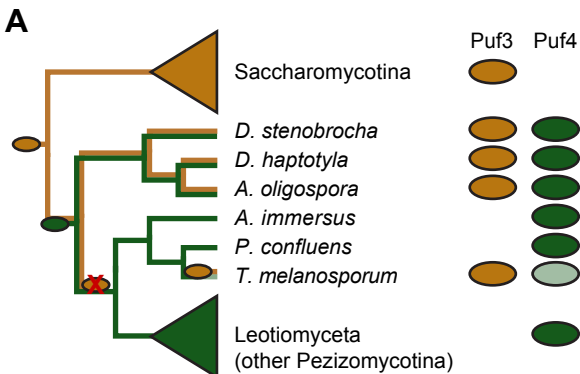**Parallel or Convergent Evolution:**

Binding sites for Puf3 gained in Saccharomycotina and in Orbiliomycetes

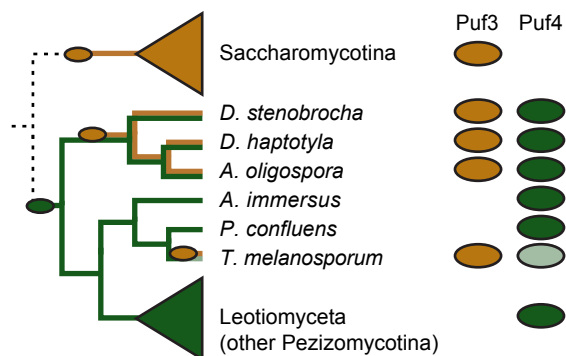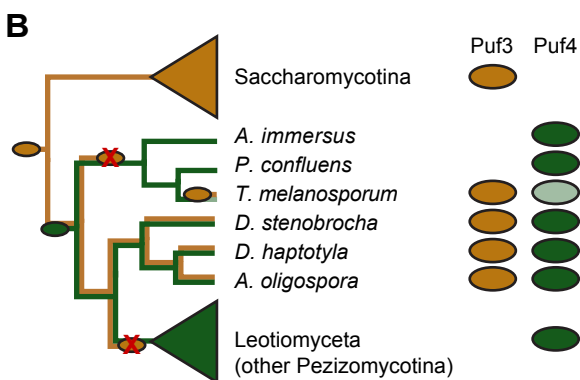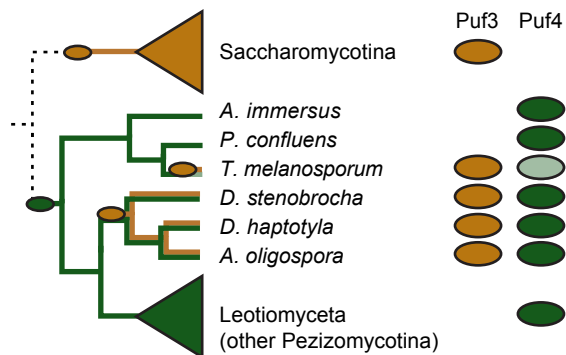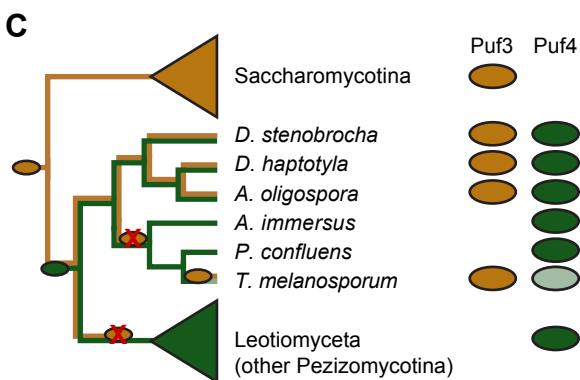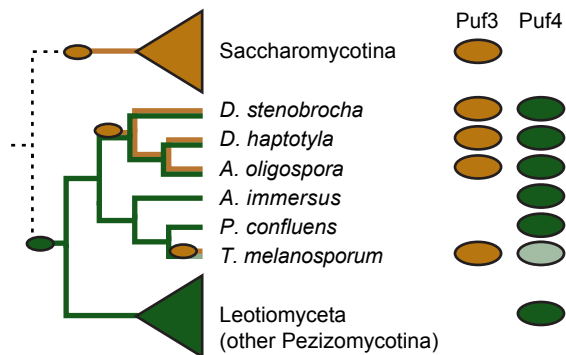

Supplement: pbio.1002307.s031.pdf [file pbio.1002307.s031.pdf]
