# Supplementary material for: Evolutionary Conservation and Diversification of Puf RNA Binding Proteins and Their mRNA Targets
Source: PubMed Central journal article supplement (PMC4654594; doi:10.1371/journal.pbio.1002307), 2015-11-20

**A****Conserved Saccharomycotina Puf Targets**

Puf4 (n = 129)

Puf5 (n = 39)

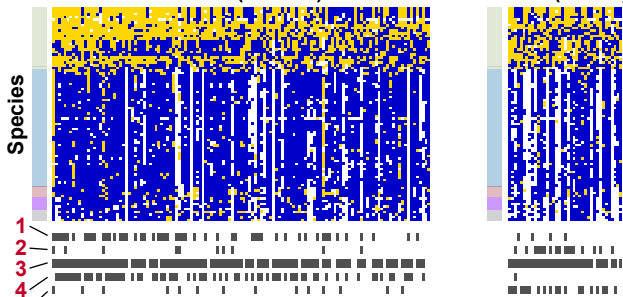

(1) Puf4, (2) Puf5 target in *S. cerevisiae* (Gerber *et al.* 2004)  
 (3) nucleus, (4) nucleolus, (5) chromatin organization (GO term)

**Randomly Selected Ortholog Sets for Comparison**

using Puf4 motifs (n = 129)

using Puf5 motifs (n = 39)

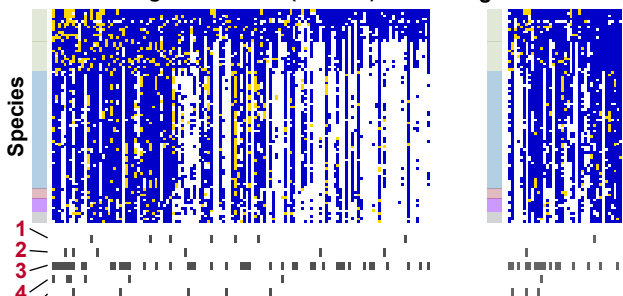

■ match to respective motif ■ no match □ no ortholog

**B**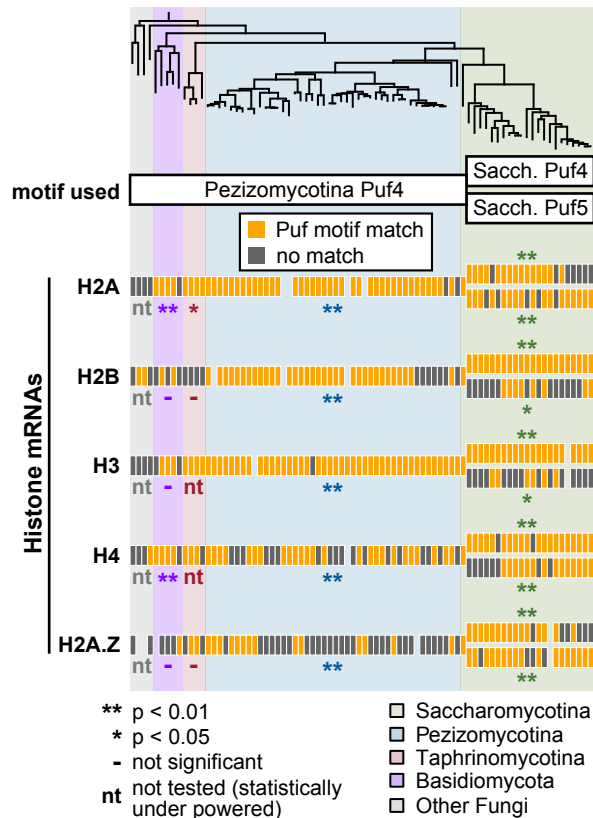

Supplement: pbio.1002307.s034.pdf [file pbio.1002307.s034.pdf]
