# Supplementary material for: Evolutionary Conservation and Diversification of Puf RNA Binding Proteins and Their mRNA Targets
Source: PLoS Biol. 2015 Nov 20;13(11):e1002307. doi: 10.1371/journal.pbio.1002307 (PMC4654594; doi:10.1371/journal.pbio.1002307)
Supplement: S2 Table — (XLSX) [file pbio.1002307.s037.xlsx]

## Sheet: PumDomains_forExcel
# Species__ID: a concatenation of the species fasta filename and the protein identifier
# Species: species fasta filename
# ID: protein identifier
# Species_Num_Tree: order of the species in our phylogeny (1 is the top)
# Annotation_notes: a few reference notes
# RBBH_FINAL: ortholog assigned based on reciprocal best BLAST hit(s) (RBBH)
# repeat_FINAL: ortholog assigned based on pattern of predicted RNA-contacting residues with each Puf repeat
# unknownGroup_ML tree: notes on ortholog assignment based on maximum likelihood tree (only proteins not assigned by RBBH or pattern of RNA-contacting residues) were tested
# Final_Group: final ortholog assignment (based on RBBH, pattern of RNA-contacting residues, and/or phylogenetic tree)
# Scer_RBBH: if protein has reciprocal best BLAST hit with a S. cerevisiae Puf, then that Puf is listed, else NA
# Ncra_RBBH: if protein has reciprocal best BLAST hit with a N. crassa Puf, then that Puf is listed, else NA
# Scer_RBBH_common_name: common name of the S. cerevisiae RBBH else NA
# Ncra_RBBH_common_name: common name of the N. crassa RBBH else NA
# RBBH_agreement: do RBBH agree between S. cerevisiae and N. crassa? If so, list the common name of the Puf
# RBBH_FINAL: ortholog assigned based on reciprocal best BLAST hit(s) (RBBH)
# Num_Puf_Repeats: number of Puf repeats identified by the SMART annotation tool
# Num_Puf_Repeats_Visible: Number of Puf repeats defined to shown by the SMART annotation tool
# Puf_repeat_ends: positions marking the start and end of the identified Puf repeats
# RRM_ends: position marking the start and end of RRM domains identified by the SMART annotation tool
# low_complexity_ends: positions marking the start and end of regions defined as "low complexity" by the SMART annotation tool
# R1-R8: predicted RNA-contacting residues within the given repeat (e.g. R1 lists the RNA-contacting residues in the first repeat)
# repeats_rna_contacts: a concatenation of all predicted RNA-contacting residues
# length: length of the string in "repeats_rna_contacts"
# repeat_perfect_match_SMART: if "repeats_rna_contacts" is a perfect match to the pattern of a reference Puf, then that Puf is listed, else blank
# Domain_Ann: additional domains used to suggest Puf orthology (Puf1 and Puf2 have a conserved RRM)
# repeat_close_match: if "repeats_rna_contacts" is a close match to the pattern of a reference Puf, then that Puf is listed, else blank
# repeat_FINAL (perfect or close match): ortholog assignment if protein has perfect or close match in RNA-contacting residues
# RNA_contacts_Puf3_MultipleSequenceAlignment: for Puf3 orthologs, predicted RNA-contacts extracted based on a multiple sequence alignment, NA if not included in alignment
# RNA_contacts_Puf3_match: 1 if Puf3 ortholog has matching RNA-contacting residues, else 0, NA if not used for analysis
Species__ID	Species	ID	Species_Number	Annotation_notes	RBBH_FINAL	repeat_FINAL (perfect or close match)	unknownGroup_ML tree	Final_Group		Scer_RBBH	Ncra_RBBH	Scer_RBBH_common_name	Ncra_RBBH_common_name	RBBH_agreement		Best_Guess_RBBH	RBBH_FINAL		Num_Puf_Repeats	Num_Puf_Repeats_Visible	Puf_repeat_ends	RRM_ends	low_complexity_ends	R1	R2	R3	R4	R5	R6	R7	R8	repeats_rna_contacts	length	repeat_perfect_match_SMART	repeat_close_match	Domain_Ann	repeat_FINAL (perfect or close match)		RNA_contacts_Puf3_MultipleSequenceAlignment	RNA_contacts_Puf3_match
S.cerevisiae.fa__YJL010C	S.cerevisiae.fa	YJL010C	1		Nop9			Nop9		NA	N.crassa.fa__NCU06118T0	NA	Nop9	NA	Nop9	Nop9	Nop9		8	8	92;127;128;164;188;223;286;321;334;369;371;407;512;549;550;587			SKE	SHE	SHR	SPQ	SHE	GAV	SHE	SHD	SKESHESHRSPQSHEGAVSHESHD	24						NA	NA
S.cerevisiae.fa__YJR091C	S.cerevisiae.fa	YJR091C	1		Puf1	Puf1		Puf1		NA	N.crassa.fa__NCU06199T0	NA	Puf1	NA	Puf1	Puf1	Puf1		6	6	617;652;653;689;690;724;725;760;764;799;801;837	341;416	28;40;90;98;176;185;207;229;441;462;481;494;507;521;915;935;951;979;1064;1080	NTQ	TWQ	NYQ	ARR	ALT	SLL			NTQTWQNYQARRALTSLL	18	Puf1		Puf1 or 2 - has RRM	Puf1		NA	NA
S.cerevisiae.fa__YPR042C	S.cerevisiae.fa	YPR042C	1		Puf2	Puf2		Puf2		NA	NA	NA	NA	NA	Puf2	Puf2	Puf2		6	6	576;611;612;647;649;683;684;719;723;758;761;800	317;398	89;105;133;143;257;273;436;449;479;490;901;916;943;962;988;1009;1018;1063	NTQ	TWQ	NYQ	SRR	TLT	SLL			NTQTWQNYQSRRTLTSLL	18	Puf2		Puf1 or 2 - has RRM	Puf2		NA	NA
S.cerevisiae.fa__YLL013C	S.cerevisiae.fa	YLL013C	1		Puf3	Puf3		Puf3		NA	N.crassa.fa__NCU06511T0	NA	Puf3	NA	Puf3	Puf3	Puf3		8	8	538;573;574;609;610;645;646;681;682;717;718;752;760;795;809;844		1;12;13;45;159;178;237;258;363;393;398;418;420;432;443;463;472;491;492;515;523;535	SRQ	NYQ	CRQ	NHQ	CRQ	NYQ	SNE	NYQ	SRQNYQCRQNHQCRQNYQSNENYQ	24	Puf3			Puf3		SRQNYQCRQNHQCRQNYQSNENYQ	1
S.cerevisiae.fa__YGL014W	S.cerevisiae.fa	YGL014W	1		Puf4	Puf4		Puf4		NA	N.crassa.fa__NCU11956T0	NA	Puf4	NA	Puf4	Puf4	Puf4		8	8	563;598;599;634;635;671;672;707;708;743;744;779;784;821;823;857		11;21;85;100;432;449;478;500;521;543	CRQ	NYQ	TRQ	NHQ	CCQ	NYQ	SNE	NYQ	CRQNYQTRQNHQCCQNYQSNENYQ	24	Puf4			Puf4		NA	NA
S.cerevisiae.fa__YGL178W	S.cerevisiae.fa	YGL178W	1		Puf5	Puf4		Puf5		NA	NA	NA	NA	NA	Puf5	Puf5	Puf5		8	8	210;247;248;283;284;320;327;362;365;400;401;438;439;474;504;539		12;29;86;108;188;207;622;653	CRQ	NYQ	TRQ	NHQ	CCQ	NYQ	SNE	NYQ	CRQNYQTRQNHQCCQNYQSNENYQ	24	Puf4			Puf4		NA	NA
S.cerevisiae.fa__YDR496C	S.cerevisiae.fa	YDR496C	1		Puf6			Puf6		NA	N.crassa.fa__NCU09380T0	NA	Puf6	NA	Puf6	Puf6	Puf6		6	6	156;191;192;227;228;264;341;376;377;413;415;450			SRQ	KYV	AYE	SDC	NII	RRL			SRQKYVAYESDCNIIRRL	18						NA	NA
S.cerevisiaeRM11-1a.fa__SCRT_03654	S.cerevisiaeRM11-1a.fa	SCRT_03654	2		Nop9			Nop9		S.cerevisiae.fa__YJL010C	N.crassa.fa__NCU06118T0	Nop9	Nop9	Nop9	Nop9	Nop9	Nop9		8	8	92;127;128;164;188;223;286;321;334;369;371;407;512;549;550;587			SKE	SHE	SHR	SPQ	SHE	GTV	SHE	SHD	SKESHESHRSPQSHEGTVSHESHD	24						NA	NA
S.cerevisiaeRM11-1a.fa__SCRT_03741	S.cerevisiaeRM11-1a.fa	SCRT_03741	2		Puf1	Puf1		Puf1		S.cerevisiae.fa__YJR091C	N.crassa.fa__NCU06199T0	Puf1	Puf1	Puf1	Puf1	Puf1	Puf1		6	6	617;652;653;689;690;724;725;760;764;799;801;837	341;416	28;40;90;98;176;185;207;229;441;462;481;494;507;521;915;935;951;979;1064;1080	NTQ	TWQ	NYQ	ARR	ALT	SLL			NTQTWQNYQARRALTSLL	18	Puf1		Puf1 or 2 - has RRM	Puf1		NA	NA
S.cerevisiaeRM11-1a.fa__SCRT_01022	S.cerevisiaeRM11-1a.fa	SCRT_01022	2		Puf4	Puf4		Puf4		S.cerevisiae.fa__YGL014W	N.crassa.fa__NCU11956T0	Puf4	Puf4	Puf4	Puf4	Puf4	Puf4		8	8	569;604;605;640;641;677;678;713;714;749;750;785;790;827;829;863		11;21;85;100;433;450;479;501;522;549	CRQ	NYQ	TRQ	NHQ	CCQ	NYQ	SNE	NYQ	CRQNYQTRQNHQCCQNYQSNENYQ	24	Puf4			Puf4		NA	NA
S.cerevisiaeRM11-1a.fa__SCRT_01168	S.cerevisiaeRM11-1a.fa	SCRT_01168	2		Puf5	Puf4		Puf5		S.cerevisiae.fa__YGL178W	NA	Puf5	NA	NA	NA	Puf5	Puf5		8	8	185;222;223;258;259;295;302;337;340;375;376;413;414;449;479;514		61;83;163;182;597;628	CRQ	NYQ	TRQ	NHQ	CCQ	NYQ	SNE	NYQ	CRQNYQTRQNHQCCQNYQSNENYQ	24	Puf4			Puf4		NA	NA
S.cerevisiaeRM11-1a.fa__SCRT_00046	S.cerevisiaeRM11-1a.fa	SCRT_00046	2		Puf6			Puf6		S.cerevisiae.fa__YDR496C	N.crassa.fa__NCU09380T0	Puf6	Puf6	Puf6	Puf6	Puf6	Puf6		6	6	156;191;192;227;228;264;341;376;377;413;415;450			SRQ	KYV	AYE	SDC	NII	RRL			SRQKYVAYESDCNIIRRL	18						NA	NA
S.paradoxus.fa__spar_300-g9.1	S.paradoxus.fa	spar_300-g9.1	3		Nop9			Nop9		S.cerevisiae.fa__YJL010C	N.crassa.fa__NCU06118T0	Nop9	Nop9	Nop9	Nop9	Nop9	Nop9		8	8	92;127;128;164;188;223;286;321;334;369;371;407;512;549;550;587		461;472	SKE	SHE	SHR	SPQ	SHE	GAV	SHE	SHD	SKESHESHRSPQSHEGAVSHESHD	24						NA	NA
S.paradoxus.fa__spar_306-g8.1	S.paradoxus.fa	spar_306-g8.1	3		Puf1	Puf1		Puf1		S.cerevisiae.fa__YJR091C	NA	Puf1	NA	NA	NA	NA	Puf1		6	6	618;653;654;690;691;725;726;761;765;800;802;838	342;417	28;41;91;99;177;186;208;230;453;463;482;495;509;522;916;936;952;962;964;978;1040;1056;1064;1081	NTQ	TWQ	NYQ	ARR	ALT	SLL			NTQTWQNYQARRALTSLL	18	Puf1		Puf1 or 2 - has RRM	Puf1		NA	NA
S.paradoxus.fa__spar_64-g3.1	S.paradoxus.fa	spar_64-g3.1	3		Puf1 or Puf2	Puf2	Puf2	Puf2		S.cerevisiae.fa__YPR042C	N.crassa.fa__NCU06199T0	Puf2	Puf1	not the same	not the same	not the same	Puf1 or Puf2		6	6	578;613;614;650;651;685;686;721;725;760;763;802	317;398	42;57;92;105;132;156;257;273;436;451;476;491;903;918;952;965;983;1003;1020;1057	NTQ	TWQ	NYQ	SRR	TLT	SLL			NTQTWQNYQSRRTLTSLL	18	Puf2		Puf1 or 2 - has RRM	Puf2		NA	NA
S.paradoxus.fa__spar_52-g2.1	S.paradoxus.fa	spar_52-g2.1	3		Puf3	Puf3		Puf3		S.cerevisiae.fa__YLL013C	N.crassa.fa__NCU06511T0	Puf3	Puf3	Puf3	Puf3	Puf3	Puf3		8	8	543;578;579;614;615;650;651;686;687;722;723;757;765;800;814;849		1;10;11;47;108;127;155;173;233;254;359;376;379;393;394;427;452;472;481;494;505;515	SRQ	NYQ	CRQ	NHQ	CRQ	NYQ	SNE	NYQ	SRQNYQCRQNHQCRQNYQSNENYQ	24	Puf3			Puf3		SRQNYQCRQNHQCRQNYQSNENYQ	1
S.paradoxus.fa__spar_15-g1.1	S.paradoxus.fa	spar_15-g1.1	3	possibly missing N-terminus, Puf domain truncated			Puf4	Puf4		NA	NA	NA	NA	NA	NA	NA			3	3	6;41;46;83;85;119			NYQ	SNE	NYQ						NYQSNENYQ	9						NA	NA
S.paradoxus.fa__spar_282-g1.1	S.paradoxus.fa	spar_282-g1.1	3		Puf4 or Puf5	Puf4	Puf5	Puf5		S.cerevisiae.fa__YGL178W	N.crassa.fa__NCU11956T0	Puf5	Puf4	not the same	not the same	not the same	Puf4 or Puf5		8	8	185;222;223;258;259;295;302;337;340;375;376;413;414;449;479;514		61;83;165;176;597;630	CRQ	NYQ	TRQ	NHQ	CCQ	NYQ	SNE	NYQ	CRQNYQTRQNHQCCQNYQSNENYQ	24	Puf4			Puf4		NA	NA
S.paradoxus.fa__spar_349-g9.1	S.paradoxus.fa	spar_349-g9.1	3		Puf6			Puf6		S.cerevisiae.fa__YDR496C	N.crassa.fa__NCU09380T0	Puf6	Puf6	Puf6	Puf6	Puf6	Puf6		6	6	156;191;192;227;228;264;341;376;377;413;415;450		30;42;47;65;77;103	SRQ	KYV	AYE	SDC	NTI	RRL			SRQKYVAYESDCNTIRRL	18						NA	NA
S.mikatae.fa__smik_334-g10.1	S.mikatae.fa	smik_334-g10.1	4		Nop9			Nop9		S.cerevisiae.fa__YJL010C	N.crassa.fa__NCU06118T0	Nop9	Nop9	Nop9	Nop9	Nop9	Nop9		8	8	92;127;128;164;188;223;286;321;334;369;371;407;512;549;550;587		461;472	SKE	SHE	SHR	SPQ	SHE	GAV	SHE	SHD	SKESHESHRSPQSHEGAVSHESHD	24						NA	NA
S.mikatae.fa__smik_742-g11.1	S.mikatae.fa	smik_742-g11.1	4		Puf1	Puf1		Puf1		S.cerevisiae.fa__YJR091C	N.crassa.fa__NCU06199T0	Puf1	Puf1	Puf1	Puf1	Puf1	Puf1		6	6	615;650;651;687;688;722;723;758;762;797;799;835	342;417	86;103;177;186;208;230;449;465;482;494;498;519;913;933;949;959;1061;1071	NTQ	TWQ	NYQ	ARR	ALT	SLL			NTQTWQNYQARRALTSLL	18	Puf1		Puf1 or 2 - has RRM	Puf1		NA	NA
S.mikatae.fa__smik_246-g13.1	S.mikatae.fa	smik_246-g13.1	4		Puf2	Puf2		Puf2		S.cerevisiae.fa__YPR042C	NA	Puf2	NA	NA	NA	NA	Puf2		6	6	578;613;614;650;651;685;686;721;725;760;763;802	317;398	92;105;133;156;257;272;436;454;481;492;903;918;954;964;993;1006;1013;1068	NTQ	TWQ	NYQ	SRR	TLT	SLL			NTQTWQNYQSRRTLTSLL	18	Puf2		Puf1 or 2 - has RRM	Puf2		NA	NA
S.mikatae.fa__smik_1210-g1.1	S.mikatae.fa	smik_1210-g1.1	4		Puf3	Puf3		Puf3		S.cerevisiae.fa__YLL013C	N.crassa.fa__NCU06511T0	Puf3	Puf3	Puf3	Puf3	Puf3	Puf3		8	8	532;567;568;603;604;639;640;675;676;711;712;746;754;789;803;838		9;27;153;172;220;252;345;355;357;388;392;407;427;454;460;504	SRQ	NYQ	CRQ	NHQ	CRQ	NYQ	SNE	NYQ	SRQNYQCRQNHQCRQNYQSNENYQ	24	Puf3			Puf3		SRQNYQCRQNHQCRQNYQSNENYQ	1
S.mikatae.fa__smik_269-g41.1	S.mikatae.fa	smik_269-g41.1	4	should be combined with smik_270-g1.1, missing C-terminus, Puf domain truncated	Puf4	Puf4		Puf4		NA	N.crassa.fa__NCU11956T0	NA	Puf4	NA	NA	NA	Puf4		6	6	1;27;28;64;65;100;101;136;137;172;194;228			EVE	TRQ	NHQ	CCQ	NYQ	NYQ			EVETRQNHQCCQNYQNYQ	18		Puf4 - one of rep1 and 2 missing while other is different, missing rep7		Puf4		NA	NA
S.mikatae.fa__smik_270-g1.1	S.mikatae.fa	smik_270-g1.1	4	should be combined with smik_269-g41.1, missing N-terminus, Puf domain truncated	Puf4			Puf4		S.cerevisiae.fa__YGL014W	NA	Puf4	NA	NA	NA	NA	Puf4		2	2	569;604;605;640		8;26;85;100;433;451;480;498;522;549	CRQ	NYQ							CRQNYQ	6						NA	NA
S.mikatae.fa__smik_735-g18.1	S.mikatae.fa	smik_735-g18.1	4		Puf5	Puf4		Puf5		S.cerevisiae.fa__YGL178W	NA	Puf5	NA	NA	NA	Puf5	Puf5		8	8	209;246;247;282;283;319;326;361;364;399;400;437;438;473;503;538		15;32;94;110;187;206;621;647	CRQ	NYQ	TRQ	NHQ	CCQ	NYQ	SNE	NYQ	CRQNYQTRQNHQCCQNYQSNENYQ	24	Puf4			Puf4		NA	NA
S.mikatae.fa__smik_650-g19.1	S.mikatae.fa	smik_650-g19.1	4		Puf6			Puf6		S.cerevisiae.fa__YDR496C	N.crassa.fa__NCU09380T0	Puf6	Puf6	Puf6	Puf6	Puf6	Puf6		6	6	156;191;192;227;228;264;341;376;377;413;415;450		48;102	SRQ	KYV	AYE	SDC	NII	RRL			SRQKYVAYESDCNIIRRL	18						NA	NA
S.kudriavzevii.fa__YPR042C_c1654_964-4176	S.kudriavzevii.fa	YPR042C_c1654_964-4176	5		Puf1 or Puf2	Puf2	Puf2	Puf2		S.cerevisiae.fa__YPR042C	N.crassa.fa__NCU06199T0	Puf2	Puf1	not the same	not the same	not the same	Puf1 or Puf2		6	6	571;606;607;642;644;678;679;714;718;753;756;795	314;395	89;105;131;145;149;162;433;445;474;482;866;876;897;913;947;957;990;1010;1015;1058	NTQ	TWQ	NYQ	SRR	TLT	SLL			NTQTWQNYQSRRTLTSLL	18	Puf2		Puf1 or 2 - has RRM	Puf2		NA	NA
S.kudriavzevii.fa__YDR496C_c1671_3033-5018	S.kudriavzevii.fa	YDR496C_c1671_3033-5018	5		Puf6			Puf6		S.cerevisiae.fa__YDR496C	N.crassa.fa__NCU09380T0	Puf6	Puf6	Puf6	Puf6	Puf6	Puf6		6	6	161;196;197;232;233;269;346;381;382;418;420;455		50;64;77;107	SRQ	KYV	AYE	SDC	NII	RRL			SRQKYVAYESDCNIIRRL	18						NA	NA
S.bayanus.fa__sbayc646-g17.1	S.bayanus.fa	sbayc646-g17.1	6		Nop9			Nop9		S.cerevisiae.fa__YJL010C	N.crassa.fa__NCU06118T0	Nop9	Nop9	Nop9	Nop9	Nop9	Nop9		8	8	92;127;128;164;188;223;286;321;334;369;371;407;512;549;550;587		461;472	SKE	SHE	SHR	SPQ	SHE	GAV	SHE	SHD	SKESHESHRSPQSHEGAVSHESHD	24						NA	NA
S.bayanus.fa__sbayc670-g49.1	S.bayanus.fa	sbayc670-g49.1	6		Puf1	Puf1		Puf1		S.cerevisiae.fa__YJR091C	N.crassa.fa__NCU06199T0	Puf1	Puf1	Puf1	Puf1	Puf1	Puf1		6	6	617;652;653;689;690;724;725;760;764;799;801;837	341;416	90;98;172;185;192;201;448;464;480;521;915;935;959;981;1063;1074	NTQ	TWQ	NYQ	ARR	ALT	SLL			NTQTWQNYQARRALTSLL	18	Puf1		Puf1 or 2 - has RRM	Puf1		NA	NA
S.bayanus.fa__sbayc661-g44.1	S.bayanus.fa	sbayc661-g44.1	6		Puf2	Puf2		Puf2		S.cerevisiae.fa__YPR042C	NA	Puf2	NA	NA	NA	NA	Puf2		6	6	571;606;607;642;644;678;679;714;718;753;756;795	316;396	128;178;256;272;434;444;474;482;866;885;894;916;992;1015;1024;1063	NTQ	TWQ	NYQ	SRR	TLT	SLL			NTQTWQNYQSRRTLTSLL	18	Puf2		Puf1 or 2 - has RRM	Puf2		NA	NA
S.bayanus.fa__sbayc566-g3.1	S.bayanus.fa	sbayc566-g3.1	6		Puf3	Puf3		Puf3		S.cerevisiae.fa__YLL013C	N.crassa.fa__NCU06511T0	Puf3	Puf3	Puf3	Puf3	Puf3	Puf3		8	8	517;552;553;588;589;624;625;660;661;696;697;731;739;774;788;823		1;10;11;47;125;138;165;175;224;236;237;255;353;375;381;409;452;464;473;490	SRQ	NYQ	CRQ	NHQ	CRQ	NYQ	SNE	NYQ	SRQNYQCRQNHQCRQNYQSNENYQ	24	Puf3			Puf3		SRQNYQCRQNHQCRQNYQSNENYQ	1
S.bayanus.fa__sbayc590-g21.1	S.bayanus.fa	sbayc590-g21.1	6		Puf4	Puf4		Puf4		S.cerevisiae.fa__YGL014W	N.crassa.fa__NCU11956T0	Puf4	Puf4	Puf4	Puf4	Puf4	Puf4		8	8	582;617;618;653;654;690;691;726;727;762;763;798;803;840;842;876		11;22;86;101;431;449;458;497;520;562	CRQ	NYQ	TRQ	NHQ	CCQ	NYQ	SNE	NYQ	CRQNYQTRQNHQCCQNYQSNENYQ	24	Puf4			Puf4		NA	NA
S.bayanus.fa__sbayc674-g26.1	S.bayanus.fa	sbayc674-g26.1	6		Puf5	Puf4		Puf5		S.cerevisiae.fa__YGL178W	NA	Puf5	NA	NA	NA	Puf5	Puf5		8	8	185;222;223;258;259;295;302;337;340;375;376;413;414;449;479;514		61;84;119;130;160;182;597;619;713;725	CRQ	NYQ	TRQ	NHQ	CCQ	NYQ	SNE	NYQ	CRQNYQTRQNHQCCQNYQSNENYQ	24	Puf4			Puf4		NA	NA
S.bayanus.fa__sbayc631-g22.1	S.bayanus.fa	sbayc631-g22.1	6		Puf6			Puf6		S.cerevisiae.fa__YDR496C	N.crassa.fa__NCU09380T0	Puf6	Puf6	Puf6	Puf6	Puf6	Puf6		6	6	162;197;198;233;234;270;347;382;383;419;421;456		45;108	SRQ	KYV	AYE	SDC	NII	RRL			SRQKYVAYESDCNIIRRL	18						NA	NA
S.castellii.fa__Scas7.1	S.castellii.fa	Scas7.1	7	possibly missing N and C terminus, RRM/Puf domains truncated			Puf1 or Puf2	?		NA	NA	NA	NA	NA	NA	NA			2	1	171;206;207;241		34;73	NTQ	TWQ							NTQTWQ	6						NA	NA
S.castellii.fa__Scas684.35	S.castellii.fa	Scas684.35	7		Nop9			Nop9		S.cerevisiae.fa__YJL010C	N.crassa.fa__NCU06118T0	Nop9	Nop9	Nop9	Nop9	Nop9	Nop9		8	8	138;173;174;210;239;274;337;372;385;420;422;458;563;600;601;638		42;57;75;90	SKE	SHE	SHR	SPQ	SHQ	GSV	SHE	SHD	SKESHESHRSPQSHQGSVSHESHD	24						NA	NA
S.castellii.fa__Scas674.27	S.castellii.fa	Scas674.27	7		Puf1	Puf1 or Puf2		Puf1		S.cerevisiae.fa__YJR091C	N.crassa.fa__NCU06199T0	Puf1	Puf1	Puf1	Puf1	Puf1	Puf1		5	5	607;642;643;678;680;714;715;750;791;827	330;405	194;202;423;448;491;511;906;926;956;983;1047;1061	NTQ	TWQ	NYQ	ARR	SLL				NTQTWQNYQARRSLL	15		Puf1 or Puf2	Puf1 or 2 - has RRM	Puf1 or Puf2		NA	NA
S.castellii.fa__Scas672.26	S.castellii.fa	Scas672.26	7			Puf1 or Puf2	Puf1 or Puf2	Puf2		NA	NA	NA	NA	NA	NA	NA			6	6	614;649;650;685;687;721;722;757;761;796;798;833	342;427	93;104;933;951;1022;1037;1055;1072	NTQ	TWQ	NYQ	ARR	TLS	SLL			NTQTWQNYQARRTLSSLL	18		Puf1 or Puf2	Puf1 or 2 - has RRM	Puf1 or Puf2		NA	NA
S.castellii.fa__Scas688.28	S.castellii.fa	Scas688.28	7		Puf3	Puf3		Puf3		S.cerevisiae.fa__YLL013C	N.crassa.fa__NCU06511T0	Puf3	Puf3	Puf3	Puf3	Puf3	Puf3		8	8	485;521;522;557;558;593;594;629;630;665;666;702;711;746;760;795		32;60;78;91;109;129;273;279;280;292;334;351;379;401;418;440;442;462	SRQ	NYQ	CRQ	NHQ	CRQ	NYQ	SNE	NYQ	SRQNYQCRQNHQCRQNYQSNENYQ	24	Puf3			Puf3		SRQNYQCRQNHQCRQNYQSNENYQ	1
S.castellii.fa__Scas688.2	S.castellii.fa	Scas688.2	7		Puf4	Puf4		Puf4		S.cerevisiae.fa__YGL014W	N.crassa.fa__NCU11956T0	Puf4	Puf4	Puf4	Puf4	Puf4	Puf4		8	8	505;540;541;576;577;613;614;649;650;685;686;721;726;763;765;797		44;58;84;104;300;313;368;381;388;399;409;434;446;489	CRQ	NYQ	TRQ	NHQ	CCQ	NYQ	SNE	VLA	CRQNYQTRQNHQCCQNYQSNEVLA	24		Puf4 - rep8 different		Puf4		NA	NA
S.castellii.fa__Scas707.37	S.castellii.fa	Scas707.37	7		Puf5	Puf4		Puf5		S.cerevisiae.fa__YGL178W	NA	Puf5	NA	NA	NA	Puf5	Puf5		8	8	171;208;209;244;245;281;288;323;326;361;362;399;400;435;457;489		60;78;106;121;124;145;152;169;569;600;621;647;722;732;737;760	CRQ	NYQ	TRQ	NHQ	CCQ	NYQ	SNE	NYQ	CRQNYQTRQNHQCCQNYQSNENYQ	24	Puf4			Puf4		NA	NA
S.castellii.fa__Scas581.5	S.castellii.fa	Scas581.5	7		Puf6			Puf6		S.cerevisiae.fa__YDR496C	N.crassa.fa__NCU09380T0	Puf6	Puf6	Puf6	Puf6	Puf6	Puf6		6	6	157;192;193;228;229;265;342;377;378;414;416;451		18;29;32;46	SRQ	KYV	AYE	ADC	NLI	RRI			SRQKYVAYEADCNLIRRI	18						NA	NA
C.glabrata.fa__Cgla_CBS_138:CAGL0E06534g.t1	C.glabrata.fa	Cgla_CBS_138:CAGL0E06534g.t1	8		Nop9			Nop9		S.cerevisiae.fa__YJL010C	N.crassa.fa__NCU06118T0	Nop9	Nop9	Nop9	Nop9	Nop9	Nop9		8	8	87;122;123;159;187;222;285;320;333;368;370;406;511;548;549;586		611;626	SKE	SHE	SHR	SPQ	SHE	GAI	SHE	SHD	SKESHESHRSPQSHEGAISHESHD	24						NA	NA
C.glabrata.fa__Cgla_CBS_138:CAGL0M09108g.t1	C.glabrata.fa	Cgla_CBS_138:CAGL0M09108g.t1	8		Puf1	Puf1 or Puf2		Puf1		S.cerevisiae.fa__YJR091C	N.crassa.fa__NCU06199T0	Puf1	Puf1	Puf1	Puf1	Puf1	Puf1		6	6	597;632;633;669;670;704;705;742;744;779;781;817	340;415	185;194;212;227;431;446;477;493;507;515;891;902;921;934;965;1000;1056;1087;1089;1098	NTQ	TWQ	NYQ	ARR	TLT	SLL			NTQTWQNYQARRTLTSLL	18		Puf1 or Puf2	Puf1 or 2 - has RRM	Puf1 or Puf2		NA	NA
C.glabrata.fa__Cgla_CBS_138:CAGL0H08778g.t1	C.glabrata.fa	Cgla_CBS_138:CAGL0H08778g.t1	8			Puf1 or Puf2		Puf2		NA	NA	NA	NA	NA	NA	NA			5	5	619;654;655;691;692;726;766;801;803;839	357;442	10;29;302;312	NTQ	TWQ	NYQ	TLT	SLL				NTQTWQNYQTLTSLL	15		Puf1 or Puf2	Puf1 or 2 - has RRM	Puf1 or Puf2		NA	NA
C.glabrata.fa__Cgla_CBS_138:CAGL0D05544g.t1	C.glabrata.fa	Cgla_CBS_138:CAGL0D05544g.t1	8		Puf3	Puf3		Puf3		S.cerevisiae.fa__YLL013C	N.crassa.fa__NCU06511T0	Puf3	Puf3	Puf3	Puf3	Puf3	Puf3		8	8	567;602;603;638;639;674;675;710;711;746;747;791;792;827;841;876		65;78;80;102;148;167;200;216;279;294;343;356;360;382;405;431;523;544	SRQ	NYQ	CRQ	NHQ	CRQ	NYQ	SNE	NYQ	SRQNYQCRQNHQCRQNYQSNENYQ	24	Puf3			Puf3		SRQNYQCRQNHQCRQNYQSNENYQ	1
C.glabrata.fa__Cgla_CBS_138:CAGL0A00473g.t1	C.glabrata.fa	Cgla_CBS_138:CAGL0A00473g.t1	8		Puf4	Puf4		Puf4		S.cerevisiae.fa__YGL014W	N.crassa.fa__NCU11956T0	Puf4	Puf4	Puf4	Puf4	Puf4	Puf4		8	8	463;498;499;534;535;571;572;607;608;643;644;679;684;721;722;757		197;210;303;315;325;342;427;444	CRQ	NYQ	TRQ	NHQ	CCQ	NYQ	SNE	NYQ	CRQNYQTRQNHQCCQNYQSNENYQ	24	Puf4			Puf4		NA	NA
C.glabrata.fa__Cgla_CBS_138:CAGL0L05962g.t1	C.glabrata.fa	Cgla_CBS_138:CAGL0L05962g.t1	8		Puf5	Puf4		Puf5		S.cerevisiae.fa__YGL178W	NA	Puf5	NA	NA	NA	Puf5	Puf5		8	8	231;268;269;304;305;341;348;383;386;421;422;459;460;494;536;571		58;86;797;802	CRQ	NYQ	TRQ	NHQ	CCQ	NYQ	SNE	NYQ	CRQNYQTRQNHQCCQNYQSNENYQ	24	Puf4			Puf4		NA	NA
C.glabrata.fa__Cgla_CBS_138:CAGL0I02926g.t1	C.glabrata.fa	Cgla_CBS_138:CAGL0I02926g.t1	8		Puf6			Puf6		S.cerevisiae.fa__YDR496C	N.crassa.fa__NCU09380T0	Puf6	Puf6	Puf6	Puf6	Puf6	Puf6		6	6	166;201;202;237;238;274;351;386;387;423;425;460		25;112;116;129	SRQ	KYV	AYE	SFC	NII	RRL			SRQKYVAYESFCNIIRRL	18						NA	NA
K.waltii.fa__Kwal47.17295	K.waltii.fa	Kwal47.17295	9				?	?		NA	NA	NA	NA	NA	NA	NA			1	0	10;42		143;150;215;226	NYQ								NYQ	3						NA	NA
K.waltii.fa__Kwal23.2861	K.waltii.fa	Kwal23.2861	9		Nop9			Nop9		S.cerevisiae.fa__YJL010C	N.crassa.fa__NCU06118T0	Nop9	Nop9	Nop9	Nop9	Nop9	Nop9		8	8	89;124;125;161;189;224;291;326;339;374;376;412;517;554;555;592		2;13	SKE	SHE	SHR	SPQ	SHE	GAV	SRE	SHD	SKESHESHRSPQSHEGAVSRESHD	24						NA	NA
K.waltii.fa__Kwal33.14395	K.waltii.fa	Kwal33.14395	9		Puf1	Puf1		Puf1		S.cerevisiae.fa__YJR091C	N.crassa.fa__NCU06199T0	Puf1	Puf1	Puf1	Puf1	Puf1	Puf1		6	6	618;653;654;689;691;725;726;761;765;800;802;838	343;418	484;495;911;927;984;998;1045;1058	NTQ	TWQ	NYQ	ARR	ALT	SLL			NTQTWQNYQARRALTSLL	18	Puf1		Puf1 or 2 - has RRM	Puf1		NA	NA
K.waltii.fa__Kwal33.15113	K.waltii.fa	Kwal33.15113	9		Puf3	Puf3		Puf3		NA	N.crassa.fa__NCU06511T0	NA	Puf3	NA	NA	NA	Puf3		8	8	416;451;452;487;488;523;524;559;560;595;596;631;639;674;688;723		30;47;113;128;152;163;189;203;264;274;319;332	SRQ	NYQ	CRQ	NHQ	CRQ	NYQ	SNE	NYQ	SRQNYQCRQNHQCRQNYQSNENYQ	24	Puf3			Puf3		SRQNYQCRQNHQCRQNYQSNENYQ	1
K.waltii.fa__Kwal47.17511	K.waltii.fa	Kwal47.17511	9	possibly missing C-terminus, Puf domain truncated	Puf4	Puf4		Puf4		S.cerevisiae.fa__YGL014W	N.crassa.fa__NCU11956T0	Puf4	Puf4	Puf4	Puf4	Puf4	Puf4		8	8	383;418;419;454;455;491;492;527;528;563;564;599;604;641;643;678		42;62;257;266	CRQ	NYQ	TRQ	NHQ	CCQ	NYQ	SNE	NYQ	CRQNYQTRQNHQCCQNYQSNENYQ	24	Puf4			Puf4		NA	NA
K.waltii.fa__Kwal20.2729	K.waltii.fa	Kwal20.2729	9		Puf5	Puf4		Puf5		S.cerevisiae.fa__YGL178W	NA	Puf5	NA	NA	NA	Puf5	Puf5		6	6	163;199;201;236;237;273;280;315;318;353;354;386		50;72;120;144	CRQ	NYQ	TRQ	NHQ	CCQ	NYQ			CRQNYQTRQNHQCCQNYQ	18		Puf4 - missing rep7-8		Puf4		NA	NA
K.waltii.fa__Kwal56.22719	K.waltii.fa	Kwal56.22719	9		Puf6			Puf6		S.cerevisiae.fa__YDR496C	N.crassa.fa__NCU09380T0	Puf6	Puf6	Puf6	Puf6	Puf6	Puf6		6	6	153;188;189;224;225;261;338;373;374;410;412;447		29;49;55;92	SRQ	KYV	AYE	SEC	NII	RRL			SRQKYVAYESECNIIRRL	18						NA	NA
S.kluyveri.fa__SAKL0G11572g	S.kluyveri.fa	SAKL0G11572g	10		Nop9			Nop9		S.cerevisiae.fa__YJL010C	N.crassa.fa__NCU06118T0	Nop9	Nop9	Nop9	Nop9	Nop9	Nop9		8	8	87;122;123;159;188;223;290;325;338;373;375;411;516;553;554;591		465;476	SKE	SHE	SHR	SPQ	SHQ	GSV	SHE	SHD	SKESHESHRSPQSHQGSVSHESHD	24						NA	NA
S.kluyveri.fa__SAKL0F14102g	S.kluyveri.fa	SAKL0F14102g	10		Puf1	Puf1		Puf1		S.cerevisiae.fa__YJR091C	N.crassa.fa__NCU06199T0	Puf1	Puf1	Puf1	Puf1	Puf1	Puf1		6	6	601;636;637;672;674;708;709;746;748;783;785;821	329;410	86;103;133;159;188;201;219;231;419;437;464;503;891;901	NTQ	TWQ	NYQ	ARR	ALT	SLL			NTQTWQNYQARRALTSLL	18	Puf1		Puf1 or 2 - has RRM	Puf1		NA	NA
S.kluyveri.fa__SAKL0G13002g	S.kluyveri.fa	SAKL0G13002g	10		Puf3	Puf3		Puf3		S.cerevisiae.fa__YLL013C	N.crassa.fa__NCU06511T0	Puf3	Puf3	Puf3	Puf3	Puf3	Puf3		8	8	445;480;481;516;517;552;553;588;589;624;625;660;668;703;717;752		27;44;274;290;310;323;335;354;360;371;400;417	SRQ	NYQ	CRQ	NHQ	CRQ	NYQ	SNE	NYQ	SRQNYQCRQNHQCRQNYQSNENYQ	24	Puf3			Puf3		SRQNYQCRQNHQCRQNYQSNENYQ	1
S.kluyveri.fa__SAKL0H22022g	S.kluyveri.fa	SAKL0H22022g	10		Puf4	Puf4		Puf4		S.cerevisiae.fa__YGL014W	N.crassa.fa__NCU11956T0	Puf4	Puf4	Puf4	Puf4	Puf4	Puf4		8	8	467;502;503;538;539;575;576;611;612;647;648;683;688;725;727;762		17;25;90;103;165;189;200;218;267;279;285;295;383;394;425;448	CRQ	NYQ	TRQ	NHQ	CCQ	NYQ	SNE	NYQ	CRQNYQTRQNHQCCQNYQSNENYQ	24	Puf4			Puf4		NA	NA
S.kluyveri.fa__SAKL0H24596g	S.kluyveri.fa	SAKL0H24596g	10		Puf5	Puf4		Puf5		S.cerevisiae.fa__YGL178W	NA	Puf5	NA	NA	NA	Puf5	Puf5		8	8	142;179;180;215;216;252;259;294;297;332;333;370;371;407;430;465		102;114;122;135;505;517;573;586;592;608;704;715;729;743	CRQ	NYQ	TRQ	NHQ	CCQ	NYQ	SNE	NYQ	CRQNYQTRQNHQCCQNYQSNENYQ	24	Puf4			Puf4		NA	NA
S.kluyveri.fa__SAKL0C09328g	S.kluyveri.fa	SAKL0C09328g	10		Puf6			Puf6		S.cerevisiae.fa__YDR496C	N.crassa.fa__NCU09380T0	Puf6	Puf6	Puf6	Puf6	Puf6	Puf6		6	6	170;205;206;241;242;278;355;390;391;427;429;464		32;107	SRQ	KYV	AYE	ADC	NLI	RRL			SRQKYVAYEADCNLIRRL	18						NA	NA
S.kluyveri.fa__SAKL0H12540g	S.kluyveri.fa	SAKL0H12540g	10		Puf8	Puf8		Puf8		NA	N.crassa.fa__NCU01760T0	NA	Puf8	NA	Puf8	Puf8	Puf8		7	7	274;309;310;345;346;382;387;422;423;458;466;501;510;545			NFQ	CHQ	SHQ	SLQ	NWT	SRE	LYQ		NFQCHQSHQSLQNWTSRELYQ	21		Puf8 - missing rep1, 2 a.a. different		Puf8		NA	NA
K.lactis.fa__Klac_NRRL_Y-1140:KLLA0E13717g.t1	K.lactis.fa	Klac_NRRL_Y-1140:KLLA0E13717g.t1	11		Nop9			Nop9		S.cerevisiae.fa__YJL010C	N.crassa.fa__NCU06118T0	Nop9	Nop9	Nop9	Nop9	Nop9	Nop9		8	8	90;125;126;162;185;220;287;322;335;370;372;408;513;550;551;588		659;668	SKE	SHE	SHR	SPQ	SHQ	AAL	SHE	SHD	SKESHESHRSPQSHQAALSHESHD	24						NA	NA
K.lactis.fa__Klac_NRRL_Y-1140:KLLA0E05984g.t1	K.lactis.fa	Klac_NRRL_Y-1140:KLLA0E05984g.t1	11		Puf1	Puf1		Puf1		S.cerevisiae.fa__YJR091C	N.crassa.fa__NCU06199T0	Puf1	Puf1	Puf1	Puf1	Puf1	Puf1		6	6	634;669;670;705;707;741;742;777;781;816;818;854	377;458	193;207;225;240;463;482;962;1014	NTQ	TWQ	NYQ	ARR	ALT	SLL			NTQTWQNYQARRALTSLL	18	Puf1		Puf1 or 2 - has RRM	Puf1		NA	NA
K.lactis.fa__Klac_NRRL_Y-1140:KLLA0F15477g.t1	K.lactis.fa	Klac_NRRL_Y-1140:KLLA0F15477g.t1	11		Puf3	Puf3		Puf3		S.cerevisiae.fa__YLL013C	N.crassa.fa__NCU06511T0	Puf3	Puf3	Puf3	Puf3	Puf3	Puf3		8	8	588;623;624;659;660;695;696;731;732;767;768;810;811;846;860;896		26;39;43;63;138;167;186;202;236;250;279;303;353;369;400;411;416;436;453;464	SRQ	NYQ	CRQ	NHQ	CRQ	NYQ	SNE	NYQ	SRQNYQCRQNHQCRQNYQSNENYQ	24	Puf3			Puf3		SRQNYQCRQNHQCRQNYQSNENYQ	1
K.lactis.fa__Klac_NRRL_Y-1140:KLLA0A09097g.t1	K.lactis.fa	Klac_NRRL_Y-1140:KLLA0A09097g.t1	11		Puf4	Puf4		Puf4		S.cerevisiae.fa__YGL014W	N.crassa.fa__NCU11956T0	Puf4	Puf4	Puf4	Puf4	Puf4	Puf4		8	8	479;514;515;550;551;587;588;623;624;659;660;694;702;739;741;778		54;74;104;121;146;160;315;330;415;429;444;456	CRQ	NYQ	TRQ	NHQ	CCQ	NYQ	SNE	NYQ	CRQNYQTRQNHQCCQNYQSNENYQ	24	Puf4			Puf4		NA	NA
K.lactis.fa__Klac_NRRL_Y-1140:KLLA0E13629g.t1	K.lactis.fa	Klac_NRRL_Y-1140:KLLA0E13629g.t1	11		Puf5	Puf4		Puf5		S.cerevisiae.fa__YGL178W	NA	Puf5	NA	NA	NA	Puf5	Puf5		8	8	176;213;214;249;250;286;293;328;331;366;367;404;405;439;477;509		64;80;104;118;133;167;605;630;637;648;676;691	CRQ	NYQ	TRQ	NHQ	CCQ	NYQ	SNE	NYQ	CRQNYQTRQNHQCCQNYQSNENYQ	24	Puf4			Puf4		NA	NA
K.lactis.fa__Klac_NRRL_Y-1140:KLLA0C12331g.t1	K.lactis.fa	Klac_NRRL_Y-1140:KLLA0C12331g.t1	11		Puf6			Puf6		S.cerevisiae.fa__YDR496C	N.crassa.fa__NCU09380T0	Puf6	Puf6	Puf6	Puf6	Puf6	Puf6		6	6	161;196;197;232;233;269;346;381;382;418;420;455		32;43	SRQ	KYV	AYE	AES	AVI	RRL			SRQKYVAYEAESAVIRRL	18						NA	NA
E.gossypii.fa__Egos_ATCC_10895:AGOS_ACR046W.t1	E.gossypii.fa	Egos_ATCC_10895:AGOS_ACR046W.t1	12		Nop9			Nop9		S.cerevisiae.fa__YJL010C	N.crassa.fa__NCU06118T0	Nop9	Nop9	Nop9	Nop9	Nop9	Nop9		8	8	91;126;127;163;189;224;290;325;338;373;375;411;516;553;554;591			SKE	SHE	SHR	SPQ	SHQ	GAI	SHE	SHD	SKESHESHRSPQSHQGAISHESHD	24						NA	NA
E.gossypii.fa__Egos_ATCC_10895:AGOS_AGL305W.t1	E.gossypii.fa	Egos_ATCC_10895:AGOS_AGL305W.t1	12		Puf1	Puf1		Puf1		S.cerevisiae.fa__YJR091C	N.crassa.fa__NCU06199T0	Puf1	Puf1	Puf1	Puf1	Puf1	Puf1		6	6	627;662;663;698;700;734;735;770;774;809;811;847	360;441	5;28;55;68;108;126;155;168;296;308;498;512;920;936;957;968;973;986;1042;1056	NTQ	TWQ	NYQ	ARR	ALT	SLL			NTQTWQNYQARRALTSLL	18	Puf1		Puf1 or 2 - has RRM	Puf1		NA	NA
E.gossypii.fa__Egos_ATCC_10895:AGOS_AAL152W.t1	E.gossypii.fa	Egos_ATCC_10895:AGOS_AAL152W.t1	12		Puf3	Puf3		Puf3		NA	N.crassa.fa__NCU06511T0	NA	Puf3	NA	NA	NA	Puf3		8	8	444;479;480;515;516;551;552;587;588;623;624;659;668;703;717;752		44;55;57;68;102;109;192;217;257;275;371;409	SRQ	NYQ	CRQ	NHQ	CRQ	NYQ	SNE	NYQ	SRQNYQCRQNHQCRQNYQSNENYQ	24	Puf3			Puf3		SRQNYQCRQNHQCRQNYQSNENYQ	1
E.gossypii.fa__Egos_ATCC_10895:AGOS_AGL086C.t1	E.gossypii.fa	Egos_ATCC_10895:AGOS_AGL086C.t1	12		Puf4	Puf4		Puf4		NA	N.crassa.fa__NCU11956T0	NA	Puf4	NA	NA	NA	Puf4		8	8	411;446;447;482;483;519;520;555;556;591;592;631;632;669;671;706		202;214;248;270;361;376;385;396;397;407	CRQ	NYQ	TRQ	NHQ	CCQ	NYQ	SNE	NYQ	CRQNYQTRQNHQCCQNYQSNENYQ	24	Puf4			Puf4		NA	NA
E.gossypii.fa__Egos_ATCC_10895:AGOS_ADL056W.t1	E.gossypii.fa	Egos_ATCC_10895:AGOS_ADL056W.t1	12		Puf5	Puf4		Puf5		S.cerevisiae.fa__YGL178W	NA	Puf5	NA	NA	NA	Puf5	Puf5		8	8	161;197;199;234;235;271;278;313;316;351;352;389;390;420;465;500		112;149;570;587;616;628;643;654;659;670;684;693;725;743;763;780	CRQ	NYQ	TRQ	NHQ	CCQ	NYQ	SNE	NYQ	CRQNYQTRQNHQCCQNYQSNENYQ	24	Puf4			Puf4		NA	NA
E.gossypii.fa__Egos_ATCC_10895:AGOS_AFR342C.t1	E.gossypii.fa	Egos_ATCC_10895:AGOS_AFR342C.t1	12		Puf6			Puf6		S.cerevisiae.fa__YDR496C	N.crassa.fa__NCU09380T0	Puf6	Puf6	Puf6	Puf6	Puf6	Puf6		6	6	145;180;181;216;217;253;330;365;366;402;404;439		10;25;27;38;41;72;639;649	SRQ	KYV	AYE	AEC	NQV	RRL			SRQKYVAYEAECNQVRRL	18						NA	NA
C.albicansWO1.fa__CAWT_00989	C.albicansWO1.fa	CAWT_00989	13		Nop9			Nop9		S.cerevisiae.fa__YJL010C	N.crassa.fa__NCU06118T0	Nop9	Nop9	Nop9	Nop9	Nop9	Nop9		8	8	95;130;131;166;201;236;286;321;334;372;374;410;526;562;568;605		42;49;169;182	SKE	SHE	SHR	SPQ	GSL	GVI	CHE	SHD	SKESHESHRSPQGSLGVICHESHD	24						NA	NA
C.albicansWO1.fa__CAWT_04632	C.albicansWO1.fa	CAWT_04632	13	possibly missing N-terminus, RRM domain truncated	Puf1			Puf1		S.cerevisiae.fa__YJR091C	N.crassa.fa__NCU06199T0	Puf1	Puf1	Puf1	Puf1	Puf1	Puf1		5	5	1;35;37;72;75;109;110;146;193;227		319;331;341;355;379;388;415;451;460;469	TIK	TWQ	NYQ	ARR	NLL				TIKTWQNYQARRNLL	15						NA	NA
C.albicansWO1.fa__CAWT_03277	C.albicansWO1.fa	CAWT_03277	13	possibly missing C-terminus, Puf domain truncated	Puf3	Puf3		Puf3		S.cerevisiae.fa__YLL013C	N.crassa.fa__NCU06511T0	Puf3	Puf3	Puf3	Puf3	Puf3	Puf3		5	5	575;610;611;646;647;682;683;718;720;755		17;30;55;75;109;114;241;255;296;305;313;344;355;377;415;426;466;535;538;553	SRQ	NYQ	CRQ	NHQ	CRQ				SRQNYQCRQNHQCRQ	15		Puf3 - missing rep6-8		Puf3		SRQNYQCRQNHQCRQ---------	0
C.albicansWO1.fa__CAWT_02409	C.albicansWO1.fa	CAWT_02409	13		Puf4	Puf4		Puf4		S.cerevisiae.fa__YGL014W	N.crassa.fa__NCU11956T0	Puf4	Puf4	Puf4	Puf4	Puf4	Puf4		8	8	443;476;477;512;513;549;550;586;604;639;640;675;685;722;724;759		3;12;27;39;51;57;101;108;252;287;311;322;326;347;372;398	CRQ	NYQ	TRQ	NHQ	CCQ	NYQ	SNE	NYQ	CRQNYQTRQNHQCCQNYQSNENYQ	24	Puf4			Puf4		NA	NA
C.albicansWO1.fa__CAWT_00095	C.albicansWO1.fa	CAWT_00095	13		Puf5	Puf4		Puf5		S.cerevisiae.fa__YGL178W	NA	Puf5	NA	NA	NA	Puf5	Puf5		8	8	282;318;325;360;361;397;398;433;434;469;472;507;509;545;555;590		46;73;76;101;164;176;224;240;244;251;726;784;799;812;845;855;904;937;939;952	CRQ	NYQ	TRQ	NHQ	CCQ	NYQ	SNE	NYQ	CRQNYQTRQNHQCCQNYQSNENYQ	24	Puf4			Puf4		NA	NA
C.albicansWO1.fa__CAWT_04268	C.albicansWO1.fa	CAWT_04268	13		Puf6			Puf6		S.cerevisiae.fa__YDR496C	N.crassa.fa__NCU09380T0	Puf6	Puf6	Puf6	Puf6	Puf6	Puf6		6	6	161;196;197;232;233;269;352;387;388;424;428;463		30;40;102;114;635;664	SRQ	KYI	AYE	SDC	NII	RRL			SRQKYIAYESDCNIIRRL	18						NA	NA
C.albicansSC5314.fa__orf19.4262	C.albicansSC5314.fa	orf19.4262	14	possibly missing N-terminus, RRM domain truncated	Puf1			Puf1		S.cerevisiae.fa__YJR091C	N.crassa.fa__NCU06199T0	Puf1	Puf1	Puf1	Puf1	Puf1	Puf1		5	5	1;35;37;72;75;109;110;146;193;227		319;331;341;355;379;388;415;449;458;467	TIK	TWQ	NYQ	ARR	NLL				TIKTWQNYQARRNLL	15						NA	NA
C.albicansSC5314.fa__orf19.1795	C.albicansSC5314.fa	orf19.1795	14		Puf3	Puf3		Puf3		S.cerevisiae.fa__YLL013C	N.crassa.fa__NCU06511T0	Puf3	Puf3	Puf3	Puf3	Puf3	Puf3		8	8	584;619;620;655;656;691;692;727;729;764;765;800;801;836;857;892		17;30;55;75;109;114;241;255;296;305;310;344;355;378;416;433;473;544;547;562	SRQ	NYQ	CRQ	NHQ	CRQ	NYQ	SNE	NYQ	SRQNYQCRQNHQCRQNYQSNENYQ	24	Puf3			Puf3		SRQNYQCRQNHQCRQNYQSNENYQ	1
C.albicansSC5314.fa__orf19.5381	C.albicansSC5314.fa	orf19.5381	14		Puf4	Puf4		Puf4		S.cerevisiae.fa__YGL014W	N.crassa.fa__NCU11956T0	Puf4	Puf4	Puf4	Puf4	Puf4	Puf4		8	8	443;476;477;512;513;549;550;586;604;639;640;675;685;722;724;759		3;12;27;39;51;57;101;108;252;287;311;322;326;347;372;398	CRQ	NYQ	TRQ	NHQ	CCQ	NYQ	SNE	NYQ	CRQNYQTRQNHQCCQNYQSNENYQ	24	Puf4			Puf4		NA	NA
C.albicansSC5314.fa__orf19.4991	C.albicansSC5314.fa	orf19.4991	14		Puf5	Puf4		Puf5		S.cerevisiae.fa__YGL178W	NA	Puf5	NA	NA	NA	Puf5	Puf5		8	8	281;317;324;359;360;396;397;432;433;468;471;506;508;544;554;589		46;73;76;101;164;172;223;239;243;250;725;783;798;811;844;854;903;927	CRQ	NYQ	TRQ	NHQ	CCQ	NYQ	SNE	NYQ	CRQNYQTRQNHQCCQNYQSNENYQ	24	Puf4			Puf4		NA	NA
C.albicansSC5314.fa__orf19.3547	C.albicansSC5314.fa	orf19.3547	14		Puf6			Puf6		S.cerevisiae.fa__YDR496C	N.crassa.fa__NCU09380T0	Puf6	Puf6	Puf6	Puf6	Puf6	Puf6		6	6	161;196;197;232;233;269;352;387;388;424;428;463		30;40;102;114;635;664	SRQ	KYI	AYE	SDC	NII	RRL			SRQKYIAYESDCNIIRRL	18						NA	NA
C.dubliniensis.fa__Cd36_03800	C.dubliniensis.fa	Cd36_03800	15		Nop9			Nop9		S.cerevisiae.fa__YJL010C	N.crassa.fa__NCU06118T0	Nop9	Nop9	Nop9	Nop9	Nop9	Nop9		8	8	90;125;126;161;196;231;281;316;329;367;369;405;521;557;563;600			SKE	SHE	SHR	SPQ	GSL	GVI	CHE	SHD	SKESHESHRSPQGSLGVICHESHD	24						NA	NA
C.dubliniensis.fa__Cd36_52280	C.dubliniensis.fa	Cd36_52280	15		Puf1	Puf1 or Puf2		Puf1		S.cerevisiae.fa__YJR091C	N.crassa.fa__NCU06199T0	Puf1	Puf1	Puf1	Puf1	Puf1	Puf1		5	5	471;506;508;544;546;580;581;617;664;698		26;37;76;87;319;336;339;354;785;801;809;821;839;850;886;915;925;934	NTQ	TWQ	NYQ	ARR	NLL				NTQTWQNYQARRNLL	15		Puf1 or Puf2		Puf1 or Puf2		NA	NA
C.dubliniensis.fa__Cd36_45030	C.dubliniensis.fa	Cd36_45030	15		Puf3	Puf3		Puf3		S.cerevisiae.fa__YLL013C	N.crassa.fa__NCU06511T0	Puf3	Puf3	Puf3	Puf3	Puf3	Puf3		8	8	594;629;630;665;666;701;702;737;739;774;775;810;811;846;871;906		56;72;110;123;174;180;289;300;326;357;368;387;481;544;547;572;857;867	SRQ	NYQ	CRQ	NHQ	CRQ	NYQ	SNE	NYQ	SRQNYQCRQNHQCRQNYQSNENYQ	24	Puf3			Puf3		SRQNYQCRQNHQCRQNYQSNENYQ	1
C.dubliniensis.fa__Cd36_80670	C.dubliniensis.fa	Cd36_80670	15		Puf4	Puf4		Puf4		S.cerevisiae.fa__YGL014W	N.crassa.fa__NCU11956T0	Puf4	Puf4	Puf4	Puf4	Puf4	Puf4		8	8	444;477;478;513;514;550;551;587;607;642;643;677;691;728;730;765		3;12;40;53;55;61;105;117;253;274;280;290;315;324;326;347;372;409	CRQ	NYQ	TRQ	NHQ	CCQ	NYQ	SNE	NYQ	CRQNYQTRQNHQCCQNYQSNENYQ	24	Puf4			Puf4		NA	NA
C.dubliniensis.fa__Cd36_12560	C.dubliniensis.fa	Cd36_12560	15		Puf5	Puf4		Puf5		S.cerevisiae.fa__YGL178W	NA	Puf5	NA	NA	NA	Puf5	Puf5		8	8	284;320;327;362;363;399;400;435;436;471;474;509;511;547;557;592		3;15;23;33;47;74;77;103;153;168;218;240;244;253;699;711;728;791;796;815;837;846;889;898;910;947;955;968	CRQ	NYQ	TRQ	NHQ	CCQ	NYQ	SNE	NYQ	CRQNYQTRQNHQCCQNYQSNENYQ	24	Puf4			Puf4		NA	NA
C.dubliniensis.fa__Cd36_19660	C.dubliniensis.fa	Cd36_19660	15		Puf6			Puf6		S.cerevisiae.fa__YDR496C	N.crassa.fa__NCU09380T0	Puf6	Puf6	Puf6	Puf6	Puf6	Puf6		6	6	168;203;204;239;240;276;359;394;395;431;435;470		11;103;642;671	SRQ	KYI	AYE	SDC	NII	RRL			SRQKYIAYESDCNIIRRL	18						NA	NA
C.tropicalis.fa__CTRT_04757	C.tropicalis.fa	CTRT_04757	16		Nop9			Nop9		S.cerevisiae.fa__YJL010C	N.crassa.fa__NCU06118T0	Nop9	Nop9	Nop9	Nop9	Nop9	Nop9		8	8	86;121;122;157;188;223;273;308;322;359;361;397;513;549;555;592		2;21	SKE	SHE	SHR	SPQ	SHE	GVI	CHE	SHD	SKESHESHRSPQSHEGVICHESHD	24						NA	NA
C.tropicalis.fa__CTRT_06020	C.tropicalis.fa	CTRT_06020	16		Puf1	Puf1 or Puf2		Puf1		S.cerevisiae.fa__YJR091C	N.crassa.fa__NCU06199T0	Puf1	Puf1	Puf1	Puf1	Puf1	Puf1		6	6	448;484;485;520;523;557;558;593;603;639;641;677		42;61;96;108;116;122;137;161;166;182;241;251;303;337;762;787;846;884;890;899	NTQ	TWQ	NYQ	ARR	SLT	NLL			NTQTWQNYQARRSLTNLL	18		Puf1 or Puf2		Puf1 or Puf2		NA	NA
C.tropicalis.fa__CTRT_03880	C.tropicalis.fa	CTRT_03880	16		Puf3	Puf3		Puf3		S.cerevisiae.fa__YLL013C	N.crassa.fa__NCU06511T0	Puf3	Puf3	Puf3	Puf3	Puf3	Puf3		8	8	548;583;584;619;620;655;656;691;693;728;729;764;765;800;816;852		23;35;206;223;265;278;283;299;311;329;440;453;468;497;510;527	SRQ	NYQ	CRQ	NHQ	CRQ	NYQ	SNE	NYQ	SRQNYQCRQNHQCRQNYQSNENYQ	24	Puf3			Puf3		SRQNYQCRQNHQCRQNYQSNENYQ	1
C.tropicalis.fa__CTRT_05723	C.tropicalis.fa	CTRT_05723	16		Puf4	Puf4		Puf4		S.cerevisiae.fa__YGL014W	NA	Puf4	NA	NA	NA	NA	Puf4		8	8	368;401;402;437;438;474;475;510;511;543;544;579;580;616;617;652		49;63;102;115;163;197;204;216;247;264;279;297;311;334	CRQ	NYQ	TRQ	NHQ	LQL	NYQ	SNE	NYQ	CRQNYQTRQNHQLQLNYQSNENYQ	24		Puf4 - rep5 different		Puf4		NA	NA
C.tropicalis.fa__CTRT_03640	C.tropicalis.fa	CTRT_03640	16		Puf4 or Puf5	Puf4	Puf5	Puf5		S.cerevisiae.fa__YGL178W	N.crassa.fa__NCU11956T0	Puf5	Puf4	not the same	not the same	not the same	Puf4 or Puf5		8	8	297;333;340;375;376;412;413;448;449;484;487;522;524;560;570;605		2;29;31;52;60;75;80;98;114;129;165;178;228;239;244;271;656;671;694;709;756;784;803;816;886;893;912;942;947;957	CRQ	NYQ	TRQ	NHQ	CCQ	NYQ	SNE	NYQ	CRQNYQTRQNHQCCQNYQSNENYQ	24	Puf4			Puf4		NA	NA
C.tropicalis.fa__CTRT_01658	C.tropicalis.fa	CTRT_01658	16		Puf6			Puf6		S.cerevisiae.fa__YDR496C	N.crassa.fa__NCU09380T0	Puf6	Puf6	Puf6	Puf6	Puf6	Puf6		6	6	169;204;205;240;241;277;360;395;396;432;436;471		14;100;645;666	SRQ	KYI	AYE	SEC	NII	RRL			SRQKYIAYESECNIIRRL	18						NA	NA
C.parapsilosis.fa__CPAG_04965.1	C.parapsilosis.fa	CPAG_04965.1	17		Nop9			Nop9		S.cerevisiae.fa__YJL010C	N.crassa.fa__NCU06118T0	Nop9	Nop9	Nop9	Nop9	Nop9	Nop9		8	8	82;117;118;153;186;222;271;306;320;357;359;395;511;546;553;590			SKE	SHE	SHR	SPQ	SHE	GVI	SHE	SHD	SKESHESHRSPQSHEGVISHESHD	24						NA	NA
C.parapsilosis.fa__CPAG_02556.1	C.parapsilosis.fa	CPAG_02556.1	17		Puf1	Puf1 or Puf2		Puf1		S.cerevisiae.fa__YJR091C	N.crassa.fa__NCU06199T0	Puf1	Puf1	Puf1	Puf1	Puf1	Puf1		6	6	643;676;689;728;730;764;765;801;820;854;859;894		16;35;129;143;158;178;194;219;533;556;981;1043;1051;1071;1107;1117;1189;1198	NTQ	TWQ	NYQ	ARR	SLT	NLL			NTQTWQNYQARRSLTNLL	18		Puf1 or Puf2		Puf1 or Puf2		NA	NA
C.parapsilosis.fa__CPAG_05281.1	C.parapsilosis.fa	CPAG_05281.1	17		Puf3	Puf3		Puf3		S.cerevisiae.fa__YLL013C	N.crassa.fa__NCU06511T0	Puf3	Puf3	Puf3	Puf3	Puf3	Puf3		8	8	480;515;516;551;552;587;588;623;624;659;660;693;694;729;732;769		91;103;272;320;327;339;340;349;401;434;438;457	SRQ	NYQ	CRQ	NHQ	CRQ	NYQ	SNE	NYQ	SRQNYQCRQNHQCRQNYQSNENYQ	24	Puf3			Puf3		SRQNYQCRQNHQCRQNYQSNENYQ	1
C.parapsilosis.fa__CPAG_02608.1	C.parapsilosis.fa	CPAG_02608.1	17		Puf4	Puf4		Puf4		NA	N.crassa.fa__NCU11956T0	NA	Puf4	NA	NA	NA	Puf4		8	8	500;531;558;593;594;631;642;677;678;713;714;749;750;785;802;837		21;33;71;81;235;248;271;285;287;318;399;426;533;544	CRQ	NYQ	TRQ	NHQ	CCQ	NYQ	SNE	NYQ	CRQNYQTRQNHQCCQNYQSNENYQ	24	Puf4			Puf4		NA	NA
C.parapsilosis.fa__CPAG_05619.1	C.parapsilosis.fa	CPAG_05619.1	17		Puf5	Puf4		Puf5		S.cerevisiae.fa__YGL178W	NA	Puf5	NA	NA	NA	Puf5	Puf5		8	8	290;332;333;368;369;405;406;441;442;477;480;516;517;553;563;598		27;63;64;81;139;158;166;178;250;261;709;718;764;781;808;821;850;873;907;916;922;933;961;974	CRQ	NYQ	TRQ	NHQ	CCQ	NYQ	SNE	NYQ	CRQNYQTRQNHQCCQNYQSNENYQ	24	Puf4			Puf4		NA	NA
C.parapsilosis.fa__CPAG_02118.1	C.parapsilosis.fa	CPAG_02118.1	17		Puf6			Puf6		S.cerevisiae.fa__YDR496C	N.crassa.fa__NCU09380T0	Puf6	Puf6	Puf6	Puf6	Puf6	Puf6		6	6	213;248;249;284;285;321;404;439;440;476;480;515		37;46;85;104;112;142;699;720	SRQ	KYI	AYE	SEC	NVI	RRL			SRQKYIAYESECNVIRRL	18						NA	NA
L.elongisporus.fa__LELT_02120	L.elongisporus.fa	LELT_02120	18	possibly missing C-terminus, Puf domain truncated			?	?		NA	NA	NA	NA	NA	NA	NA			4	4	519;555;586;621;622;659;661;696		4;18;34;55;60;105;195;236;265;279;312;348;365;391;420;450	CRQ	NYQ	SRQ	MHN					CRQNYQSRQMHN	12						NA	NA
L.elongisporus.fa__LELT_01697	L.elongisporus.fa	LELT_01697	18		Nop9			Nop9		S.cerevisiae.fa__YJL010C	N.crassa.fa__NCU06118T0	Nop9	Nop9	Nop9	Nop9	Nop9	Nop9		8	8	85;120;121;156;204;239;289;324;338;375;377;413;529;565;571;608		11;19	SKE	SHE	SHR	SPQ	SHE	GVI	SHE	SHD	SKESHESHRSPQSHEGVISHESHD	24						NA	NA
L.elongisporus.fa__LELT_04156	L.elongisporus.fa	LELT_04156	18		Puf1	Puf1 or Puf2		Puf1		S.cerevisiae.fa__YJR091C	N.crassa.fa__NCU06199T0	Puf1	Puf1	Puf1	Puf1	Puf1	Puf1		5	5	429;465;466;502;504;538;539;572;619;655		17;30;134;146;163;186;262;284;322;331;870;879	NTQ	TYQ	NYQ	ARR	NLL				NTQTYQNYQARRNLL	15		Puf1 or Puf2		Puf1 or Puf2		NA	NA
L.elongisporus.fa__LELT_04613	L.elongisporus.fa	LELT_04613	18	possibly missing N-terminus, Puf domain truncated	Puf3	Puf3		Puf3		S.cerevisiae.fa__YLL013C	N.crassa.fa__NCU06511T0	Puf3	Puf3	Puf3	Puf3	Puf3	Puf3		7	7	1;27;28;64;65;100;102;137;138;173;174;209;235;272			HDI	CRQ	NHQ	CRQ	NYQ	SNE	NYQ		HDICRQNHQCRQNYQSNENYQ	21		Puf3 - rep1 missing, rep2 different		Puf3		---NYQCRQNHQCRQNYQSNENYQ	0
L.elongisporus.fa__LELT_03409	L.elongisporus.fa	LELT_03409	18		Puf4 or Puf5	Puf4	Puf5	Puf5		S.cerevisiae.fa__YGL178W	N.crassa.fa__NCU11956T0	Puf5	Puf4	not the same	not the same	not the same	Puf4 or Puf5		8	8	357;393;400;435;436;472;473;508;509;544;547;583;584;620;630;665		11;30;74;92;151;177;225;242;292;310;317;328;730;762;787;799;886;926;1043;1056;1070;1081;1091;1110	CRQ	NYQ	TRQ	NHQ	CCQ	NYQ	SNE	NYQ	CRQNYQTRQNHQCCQNYQSNENYQ	24	Puf4			Puf4		NA	NA
L.elongisporus.fa__LELT_00633	L.elongisporus.fa	LELT_00633	18		Puf6			Puf6		S.cerevisiae.fa__YDR496C	N.crassa.fa__NCU09380T0	Puf6	Puf6	Puf6	Puf6	Puf6	Puf6		6	6	193;228;229;264;265;301;384;419;420;456;460;495		64;127;507;517;536;552	SRQ	KYI	AYE	SEC	NLI	RRL			SRQKYIAYESECNLIRRL	18						NA	NA
C.lusitaniae.fa__CLUT_03151	C.lusitaniae.fa	CLUT_03151	19		Nop9			Nop9		S.cerevisiae.fa__YJL010C	N.crassa.fa__NCU06118T0	Nop9	Nop9	Nop9	Nop9	Nop9	Nop9		8	8	99;134;135;170;206;241;291;326;340;377;379;415;531;568;576;613			SKE	SHE	SHR	SPQ	SHE	GVI	SHE	SHD	SKESHESHRSPQSHEGVISHESHD	24						NA	NA
C.lusitaniae.fa__CLUT_01904	C.lusitaniae.fa	CLUT_01904	19		Puf1	Puf1 or Puf2		Puf1		S.cerevisiae.fa__YJR091C	N.crassa.fa__NCU06199T0	Puf1	Puf1	Puf1	Puf1	Puf1	Puf1		5	5	540;576;577;613;615;649;650;686;740;775		147;157;171;189;268;280;374;422;514;521;874;896;970;986	NTQ	TWQ	NYQ	ARR	NLL				NTQTWQNYQARRNLL	15		Puf1 or Puf2		Puf1 or Puf2		NA	NA
C.lusitaniae.fa__CLUT_04502	C.lusitaniae.fa	CLUT_04502	19		Puf3	Puf3		Puf3		S.cerevisiae.fa__YLL013C	N.crassa.fa__NCU06511T0	Puf3	Puf3	Puf3	Puf3	Puf3	Puf3		8	8	438;473;474;509;510;545;546;581;582;617;618;653;654;689;704;741		202;216;224;236;361;372;395;415	SRQ	NYQ	CRQ	NHQ	CRQ	NYQ	SNE	NYQ	SRQNYQCRQNHQCRQNYQSNENYQ	24	Puf3			Puf3		SRQNYQCRQNHQCRQNYQSNENYQ	1
C.lusitaniae.fa__CLUT_01339	C.lusitaniae.fa	CLUT_01339	19		Puf4	Puf4		Puf4		S.cerevisiae.fa__YGL014W	N.crassa.fa__NCU11956T0	Puf4	Puf4	Puf4	Puf4	Puf4	Puf4		8	8	379;414;428;463;464;500;501;536;537;572;573;608;609;645;646;681		47;64;141;153;191;203	CRQ	NYQ	TRQ	NHQ	CCQ	NYQ	SNE	NYQ	CRQNYQTRQNHQCCQNYQSNENYQ	24	Puf4			Puf4		NA	NA
C.lusitaniae.fa__CLUT_00066	C.lusitaniae.fa	CLUT_00066	19		Puf5	Puf4		Puf5		S.cerevisiae.fa__YGL178W	NA	Puf5	NA	NA	NA	Puf5	Puf5		8	8	131;167;174;209;210;246;247;282;283;318;321;356;358;394;404;439		10;20;24;37;40;48	CRQ	NYQ	TRQ	NHQ	CCQ	NYQ	SNE	NYQ	CRQNYQTRQNHQCCQNYQSNENYQ	24	Puf4			Puf4		NA	NA
C.lusitaniae.fa__CLUT_03781	C.lusitaniae.fa	CLUT_03781	19		Puf6			Puf6		S.cerevisiae.fa__YDR496C	N.crassa.fa__NCU09380T0	Puf6	Puf6	Puf6	Puf6	Puf6	Puf6		5	5	217;252;253;288;289;325;408;443;444;480		59;75;502;513;705;719	SRQ	KYV	AYE	SEC	NSI				SRQKYVAYESECNSI	15						NA	NA
C.guilliermondii.fa__PGUT_00609	C.guilliermondii.fa	PGUT_00609	20		Nop9			Nop9		S.cerevisiae.fa__YJL010C	N.crassa.fa__NCU06118T0	Nop9	Nop9	Nop9	Nop9	Nop9	Nop9		8	8	105;140;141;176;198;233;283;318;332;369;371;407;523;557;568;605		471;486	SKE	SHE	SHR	SPQ	SHE	GVV	SHE	SHD	SKESHESHRSPQSHEGVVSHESHD	24						NA	NA
C.guilliermondii.fa__PGUT_03079	C.guilliermondii.fa	PGUT_03079	20		Puf1	Puf1 or Puf2		Puf1		S.cerevisiae.fa__YJR091C	N.crassa.fa__NCU06199T0	Puf1	Puf1	Puf1	Puf1	Puf1	Puf1		6	6	533;568;570;606;608;642;643;678;685;720;727;763		126;142;272;293;353;367;946;955	NTQ	TWQ	NYQ	ARR	SLT	NLL			NTQTWQNYQARRSLTNLL	18		Puf1 or Puf2		Puf1 or Puf2		NA	NA
C.guilliermondii.fa__PGUT_05371	C.guilliermondii.fa	PGUT_05371	20		Puf3	Puf3		Puf3		S.cerevisiae.fa__YLL013C	N.crassa.fa__NCU06511T0	Puf3	Puf3	Puf3	Puf3	Puf3	Puf3		8	8	418;453;454;489;490;525;526;561;562;597;598;633;634;669;684;721		124;137;269;280;300;309	SRQ	NYQ	CRQ	NHQ	CRQ	NYQ	SNE	NYQ	SRQNYQCRQNHQCRQNYQSNENYQ	24	Puf3			Puf3		SRQNYQCRQNHQCRQNYQSNENYQ	1
C.guilliermondii.fa__PGUT_03517	C.guilliermondii.fa	PGUT_03517	20		Puf4	Puf4		Puf4		S.cerevisiae.fa__YGL014W	N.crassa.fa__NCU11956T0	Puf4	Puf4	Puf4	Puf4	Puf4	Puf4		8	8	395;430;442;477;478;514;515;550;551;586;587;622;623;659;660;695		239;252;267;278;324;340;353;366	CRQ	NYQ	TRQ	NHQ	CCQ	NYQ	SNE	NYQ	CRQNYQTRQNHQCCQNYQSNENYQ	24	Puf4			Puf4		NA	NA
C.guilliermondii.fa__PGUT_01044	C.guilliermondii.fa	PGUT_01044	20		Puf5	Puf4		Puf5		S.cerevisiae.fa__YGL178W	NA	Puf5	NA	NA	NA	Puf5	Puf5		8	8	104;140;147;182;183;219;220;255;256;291;294;329;331;367;377;413		6;16;18;26;460;478;492;505	CRQ	NYQ	TRQ	NHQ	CCQ	NYQ	SNE	NYQ	CRQNYQTRQNHQCCQNYQSNENYQ	24	Puf4			Puf4		NA	NA
C.guilliermondii.fa__PGUT_05099	C.guilliermondii.fa	PGUT_05099	20		Puf6			Puf6		S.cerevisiae.fa__YDR496C	N.crassa.fa__NCU09380T0	Puf6	Puf6	Puf6	Puf6	Puf6	Puf6		6	6	164;199;200;235;236;272;355;390;391;427;431;466		29;86;91;102	SRQ	KYV	AYE	CEA	NII	RRL			SRQKYVAYECEANIIRRL	18						NA	NA
D.hansenii.fa__DEHA0D17765g.1	D.hansenii.fa	DEHA0D17765g.1	21		Nop9			Nop9		S.cerevisiae.fa__YJL010C	N.crassa.fa__NCU06118T0	Nop9	Nop9	Nop9	Nop9	Nop9	Nop9		8	8	90;125;126;161;198;233;283;318;332;369;371;407;523;560;568;605			SKE	SHE	SHR	SPQ	SHE	GVI	SHE	SHD	SKESHESHRSPQSHEGVISHESHD	24						NA	NA
D.hansenii.fa__DEHA0G25883g.1	D.hansenii.fa	DEHA0G25883g.1	21		Puf1	Puf1 or Puf2		Puf1		S.cerevisiae.fa__YJR091C	N.crassa.fa__NCU06199T0	Puf1	Puf1	Puf1	Puf1	Puf1	Puf1		5	5	597;633;634;669;672;706;707;745;791;827		2;25;104;117;154;167;184;206;222;246;295;313;374;388;458;469;513;523;890;900;928;948;988;1025;1030;1061	NTQ	TWQ	NYQ	ARR	NLL				NTQTWQNYQARRNLL	15		Puf1 or Puf2		Puf1 or Puf2		NA	NA
D.hansenii.fa__DEHA0C07942g.1	D.hansenii.fa	DEHA0C07942g.1	21		Puf3	Puf3		Puf3		S.cerevisiae.fa__YLL013C	N.crassa.fa__NCU06511T0	Puf3	Puf3	Puf3	Puf3	Puf3	Puf3		8	8	477;512;513;548;549;584;585;620;621;656;657;692;693;728;743;778		84;99;289;306	SRQ	NYQ	CRQ	NHQ	CRQ	NYQ	SNE	NYQ	SRQNYQCRQNHQCRQNYQSNENYQ	24	Puf3			Puf3		SRQNYQCRQNHQCRQNYQSNENYQ	1
D.hansenii.fa__DEHA0A08910g.1	D.hansenii.fa	DEHA0A08910g.1	21		Puf4	Puf4		Puf4		S.cerevisiae.fa__YGL014W	N.crassa.fa__NCU11956T0	Puf4	Puf4	Puf4	Puf4	Puf4	Puf4		8	8	475;510;529;564;565;601;602;637;638;673;674;709;710;743;747;782		152;161;217;227;251;269;298;312;354;370;422;445	CRQ	NYQ	TRQ	NHQ	CCQ	NYQ	SNE	NYQ	CRQNYQTRQNHQCCQNYQSNENYQ	24	Puf4			Puf4		NA	NA
D.hansenii.fa__DEHA0C15378g.1	D.hansenii.fa	DEHA0C15378g.1	21		Puf5	Puf4		Puf5		S.cerevisiae.fa__YGL178W	NA	Puf5	NA	NA	NA	Puf5	Puf5		8	8	133;168;176;211;212;248;249;284;285;320;323;358;360;396;406;444		36;50;64;106;490;512	CRQ	NYQ	TRQ	NHQ	CCQ	NYQ	SNE	NYQ	CRQNYQTRQNHQCCQNYQSNENYQ	24	Puf4			Puf4		NA	NA
D.hansenii.fa__DEHA0C05698g.1	D.hansenii.fa	DEHA0C05698g.1	21		Puf6			Puf6		S.cerevisiae.fa__YDR496C	N.crassa.fa__NCU09380T0	Puf6	Puf6	Puf6	Puf6	Puf6	Puf6		6	6	164;199;200;235;236;272;355;390;391;427;431;466		27;60;64;100	SRQ	KYV	AYE	SEC	NII	RRL			SRQKYVAYESECNIIRRL	18						NA	NA
P.stipitis.fa__32802	P.stipitis.fa	32802	22		Nop9			Nop9		S.cerevisiae.fa__YJL010C	N.crassa.fa__NCU06118T0	Nop9	Nop9	Nop9	Nop9	Nop9	Nop9		8	8	91;126;127;162;194;229;279;314;328;365;367;403;519;556;564;601		169;179;664;683	SKE	SHE	SHR	SPQ	SHE	GVI	SHE	SHD	SKESHESHRSPQSHEGVISHESHD	24						NA	NA
P.stipitis.fa__77995	P.stipitis.fa	77995	22		Puf1	Puf1 or Puf2		Puf1		S.cerevisiae.fa__YJR091C	N.crassa.fa__NCU06199T0	Puf1	Puf1	Puf1	Puf1	Puf1	Puf1		5	5	635;671;672;708;710;744;745;783;829;865		39;78;81;95;133;146;159;193;266;281;317;344;591;605;984;1009;1029;1047;1053;1069;1078;1108	NTQ	TWQ	NYQ	ARR	NLL				NTQTWQNYQARRNLL	15		Puf1 or Puf2		Puf1 or Puf2		NA	NA
P.stipitis.fa__86424	P.stipitis.fa	86424	22		Puf3	Puf3		Puf3		S.cerevisiae.fa__YLL013C	N.crassa.fa__NCU06511T0	Puf3	Puf3	Puf3	Puf3	Puf3	Puf3		8	8	493;528;529;564;565;600;601;636;637;672;673;708;709;744;759;796		82;93;267;282;295;310;342;358;431;451;454;469	SRQ	NYQ	CRQ	NHQ	CRQ	NYQ	SNE	NYQ	SRQNYQCRQNHQCRQNYQSNENYQ	24	Puf3			Puf3		SRQNYQCRQNHQCRQNYQSNENYQ	1
P.stipitis.fa__66941	P.stipitis.fa	66941	22		Puf4	Puf4		Puf4		S.cerevisiae.fa__YGL014W	N.crassa.fa__NCU11956T0	Puf4	Puf4	Puf4	Puf4	Puf4	Puf4		8	8	464;501;515;550;551;587;588;623;624;659;660;695;696;729;733;768		10;23;141;150;228;249;341;363;399;424	CRQ	NYQ	TRQ	NHQ	CCQ	NYQ	SNE	NYQ	CRQNYQTRQNHQCCQNYQSNENYQ	24	Puf4			Puf4		NA	NA
P.stipitis.fa__80937	P.stipitis.fa	80937	22		Puf5	Puf4		Puf5		S.cerevisiae.fa__YGL178W	NA	Puf5	NA	NA	NA	Puf5	Puf5		8	8	131;167;174;209;210;246;247;282;283;318;321;356;358;393;408;443		31;50;79;110	CRQ	NYQ	TRQ	NHQ	CCQ	NYQ	SNE	NYQ	CRQNYQTRQNHQCCQNYQSNENYQ	24	Puf4			Puf4		NA	NA
P.stipitis.fa__80365	P.stipitis.fa	80365	22		Puf6			Puf6		S.cerevisiae.fa__YDR496C	N.crassa.fa__NCU09380T0	Puf6	Puf6	Puf6	Puf6	Puf6	Puf6		6	6	157;192;193;228;229;265;348;383;384;420;424;459		644;670	SRQ	KYV	AYE	ADS	NLI	RRL			SRQKYVAYEADSNLIRRL	18						NA	NA
Y.lipolytica.fa__Ylip_CLIB122:YALI0D11242g.t1	Y.lipolytica.fa	Ylip_CLIB122:YALI0D11242g.t1	23		Nop9			Nop9		S.cerevisiae.fa__YJL010C	N.crassa.fa__NCU06118T0	Nop9	Nop9	Nop9	Nop9	Nop9	Nop9		7	7	112;147;148;183;204;239;340;375;377;412;513;549;550;587		6;22;39;50;654;703	SKE	SHE	SHR	SHQ	GFE	SRE	SHD		SKESHESHRSHQGFESRESHD	21						NA	NA
Y.lipolytica.fa__Ylip_CLIB122:YALI0A19668g.t1	Y.lipolytica.fa	Ylip_CLIB122:YALI0A19668g.t1	23		Puf1	Puf1 or Puf2		Puf1		S.cerevisiae.fa__YJR091C	NA	Puf1	NA	NA	NA	NA	Puf1		6	6	505;540;541;577;578;612;613;649;651;686;688;723	316;385	86;99;110;126;134;145;224;251;268;283;411;423	NTQ	TWQ	NYQ	SRR	ALT	ALL			NTQTWQNYQSRRALTALL	18		Puf1 or Puf2	Puf1 or 2 - has RRM	Puf1 or Puf2		NA	NA
Y.lipolytica.fa__Ylip_CLIB122:YALI0E12001g.t1	Y.lipolytica.fa	Ylip_CLIB122:YALI0E12001g.t1	23		Puf3	Puf3		Puf3		S.cerevisiae.fa__YLL013C	N.crassa.fa__NCU06511T0	Puf3	Puf3	Puf3	Puf3	Puf3	Puf3		8	8	427;462;463;498;499;534;535;570;571;605;606;641;642;677;685;720		265;285;368;381;390;400	SRQ	NYQ	CRQ	NHQ	CRQ	NYQ	SNE	NYQ	SRQNYQCRQNHQCRQNYQSNENYQ	24	Puf3			Puf3		SRQNYQCRQNHQCRQNYQSNENYQ	1
Y.lipolytica.fa__Ylip_CLIB122:YALI0E10395g.t1	Y.lipolytica.fa	Ylip_CLIB122:YALI0E10395g.t1	23		Puf4	Puf4		Puf4		S.cerevisiae.fa__YGL014W	N.crassa.fa__NCU11956T0	Puf4	Puf4	Puf4	Puf4	Puf4	Puf4		7	7	255;289;290;325;326;362;363;398;399;434;464;499;502;537		136;151;244;253	CRQ	NYQ	TRQ	NHQ	CCQ	SNE	NYQ		CRQNYQTRQNHQCCQSNENYQ	21		Puf4 - missing rep6		Puf4		NA	NA
Y.lipolytica.fa__Ylip_CLIB122:YALI0F17358g.t1	Y.lipolytica.fa	Ylip_CLIB122:YALI0F17358g.t1	23		Puf6			Puf6		S.cerevisiae.fa__YDR496C	N.crassa.fa__NCU09380T0	Puf6	Puf6	Puf6	Puf6	Puf6	Puf6		6	6	164;199;200;235;236;272;351;386;387;420;499;534		26;101;571;579	SRQ	KYV	AYE	SQC	HMM	SQS			SRQKYVAYESQCHMMSQS	18						NA	NA
A.oligospora.fa__AOL_s00083g486	A.oligospora.fa	AOL_s00083g486	24		Nop9			Nop9		S.cerevisiae.fa__YJL010C	N.crassa.fa__NCU06118T0	Nop9	Nop9	Nop9	Nop9	Nop9	Nop9		6	6	111;146;208;243;291;326;349;384;529;566;567;605			SRE	AHR	SPQ	SHE	SHQ	SHD			SREAHRSPQSHESHQSHD	18						NA	NA
A.oligospora.fa__AOL_s00043g486	A.oligospora.fa	AOL_s00043g486	24		Puf1	Puf1 or Puf2		Puf1		S.cerevisiae.fa__YJR091C	N.crassa.fa__NCU06199T0	Puf1	Puf1	Puf1	Puf1	Puf1	Puf1		6	6	630;665;666;702;703;737;738;774;776;811;813;849	421;490	72;89;99;129;282;301;495;514;946;966;1026;1037;1044;1060;1128;1139	NTQ	TWQ	NYQ	ARR	ALT	YLL			NTQTWQNYQARRALTYLL	18		Puf1 or Puf2	Puf1 or 2 - has RRM	Puf1 or Puf2		NA	NA
A.oligospora.fa__AOL_s00076g302	A.oligospora.fa	AOL_s00076g302	24		Puf3	Puf3		Puf3		S.cerevisiae.fa__YLL013C	N.crassa.fa__NCU06511T0	Puf3	Puf3	Puf3	Puf3	Puf3	Puf3		8	8	510;545;546;581;582;617;618;653;654;689;690;725;726;761;770;805		145;161;831;847;854;870	SRQ	NYQ	CRQ	NHQ	CRQ	NYQ	SNE	NYQ	SRQNYQCRQNHQCRQNYQSNENYQ	24	Puf3			Puf3		SRQNYQCRQNHQCRQNYQSNENYQ	1
A.oligospora.fa__AOL_s00054g376	A.oligospora.fa	AOL_s00054g376	24		Puf4	Puf4		Puf4		S.cerevisiae.fa__YGL014W	N.crassa.fa__NCU11956T0	Puf4	Puf4	Puf4	Puf4	Puf4	Puf4		8	8	563;598;599;634;635;671;672;707;708;743;744;779;780;821;836;871			CRQ	NYQ	TRQ	NHQ	CCQ	NYQ	SNE	NYQ	CRQNYQTRQNHQCCQNYQSNENYQ	24	Puf4			Puf4		NA	NA
A.oligospora.fa__AOL_s00006g177	A.oligospora.fa	AOL_s00006g177	24		Puf6			Puf6		S.cerevisiae.fa__YDR496C	N.crassa.fa__NCU09380T0	Puf6	Puf6	Puf6	Puf6	Puf6	Puf6		4	4	149;184;185;220;221;257;336;371		42;58;75;92;506;526	SRQ	KYV	CYD	AQM					SRQKYVCYDAQM	12						NA	NA
A.oligospora.fa__AOL_s00054g387	A.oligospora.fa	AOL_s00054g387	24		Puf8	Puf8		Puf8		NA	N.crassa.fa__NCU01760T0	NA	Puf8	NA	Puf8	Puf8	Puf8		7	7	367;402;403;438;439;477;479;514;515;550;551;587;596;631		24;36;223;230;250;260;287;298;672;690	NFQ	CHQ	CHQ	SLQ	NWQ	SKE	NYQ		NFQCHQCHQSLQNWQSKENYQ	21		Puf8 - missing rep1		Puf8		NA	NA
T.melanosporum.fa__GSTUMT00006325001	T.melanosporum.fa	GSTUMT00006325001	25		Nop9			Nop9		S.cerevisiae.fa__YJL010C	N.crassa.fa__NCU06118T0	Nop9	Nop9	Nop9	Nop9	Nop9	Nop9		0	0			66;86;105;118;390;403										0						NA	NA
T.melanosporum.fa__GSTUMT00008056001	T.melanosporum.fa	GSTUMT00008056001	25		Puf1	Puf1 or Puf2		Puf1		S.cerevisiae.fa__YJR091C	N.crassa.fa__NCU06199T0	Puf1	Puf1	Puf1	Puf1	Puf1	Puf1		6	6	561;596;597;633;634;668;669;705;707;742;744;780	344;413	50;61;76;96;216;225;241;258;428;450;518;527;895;903;922;928;1046;1061;1065;1073	NTQ	TWQ	NYQ	ARR	ALT	YLL			NTQTWQNYQARRALTYLL	18		Puf1 or Puf2	Puf1 or 2 - has RRM	Puf1 or Puf2		NA	NA
T.melanosporum.fa__GSTUMT00006192001	T.melanosporum.fa	GSTUMT00006192001	25		Puf3	Puf3		Puf3		S.cerevisiae.fa__YLL013C	N.crassa.fa__NCU06511T0	Puf3	Puf3	Puf3	Puf3	Puf3	Puf3		8	8	616;651;652;687;688;723;724;759;760;795;796;831;832;867;875;910		44;70;79;89;253;263;390;401;542;555;938;952;965;980	SRQ	NYQ	CRQ	NHQ	CRQ	NYQ	SNE	NYQ	SRQNYQCRQNHQCRQNYQSNENYQ	24	Puf3			Puf3		SRQNYQCRQNHQCRQNYQSNENYQ	1
T.melanosporum.fa__GSTUMT00009328001	T.melanosporum.fa	GSTUMT00009328001	25		Puf4	Puf4		Puf4		S.cerevisiae.fa__YGL014W	N.crassa.fa__NCU11956T0	Puf4	Puf4	Puf4	Puf4	Puf4	Puf4		8	8	594;629;630;665;666;702;703;740;741;776;777;812;813;848;852;887		330;340;402;413;514;537;902;916;922;943	CRQ	NYQ	TRQ	NHQ	CCQ	NYQ	SNE	NYQ	CRQNYQTRQNHQCCQNYQSNENYQ	24	Puf4			Puf4		NA	NA
T.melanosporum.fa__GSTUMT00002396001	T.melanosporum.fa	GSTUMT00002396001	25		Puf6			Puf6		S.cerevisiae.fa__YDR496C	N.crassa.fa__NCU09380T0	Puf6	Puf6	Puf6	Puf6	Puf6	Puf6		6	6	155;190;191;226;227;263;342;377;378;415;487;521		43;56;618;629;645;659	SRQ	KYV	ALE	SQI	YLL	CQT			SRQKYVALESQIYLLCQT	18						NA	NA
T.melanosporum.fa__GSTUMT00009368001	T.melanosporum.fa	GSTUMT00009368001	25		Puf8	Puf8		Puf8		NA	N.crassa.fa__NCU01760T0	NA	Puf8	NA	Puf8	Puf8	Puf8		8	8	411;446;447;482;483;518;519;557;559;594;595;630;631;666;675;710		371;388	SIQ	NFQ	CHQ	CHQ	SLQ	NWQ	SKE	NYQ	SIQNFQCHQCHQSLQNWQSKENYQ	24	Puf8			Puf8		NA	NA
T.tonsurans.fa__TESG_07744T0	T.tonsurans.fa	TESG_07744T0	26		Nop9			Nop9		S.cerevisiae.fa__YJL010C	N.crassa.fa__NCU06118T0	Nop9	Nop9	Nop9	Nop9	Nop9	Nop9		4	4	110;145;146;181;361;396;398;433		3;14;678;686	SRE	SHE	SRE	SYI					SRESHESRESYI	12						NA	NA
T.tonsurans.fa__TESG_05413T0	T.tonsurans.fa	TESG_05413T0	26		Puf1	Puf1 or Puf2		Puf1		S.cerevisiae.fa__YJR091C	N.crassa.fa__NCU06199T0	Puf1	Puf1	Puf1	Puf1	Puf1	Puf1		6	6	680;715;716;752;753;787;788;824;826;861;863;899	473;542	17;33;166;175;246;259;361;374;941;955;970;977;1084;1095;1103;1122;1137;1151;1194;1204	NTQ	TWQ	NYQ	ARR	ALT	YLL			NTQTWQNYQARRALTYLL	18		Puf1 or Puf2	Puf1 or 2 - has RRM	Puf1 or Puf2		NA	NA
T.tonsurans.fa__TESG_08275T0	T.tonsurans.fa	TESG_08275T0	26		Puf3			Puf3		S.cerevisiae.fa__YLL013C	N.crassa.fa__NCU06511T0	Puf3	Puf3	Puf3	Puf3	Puf3	Puf3		6	6	327;362;363;398;399;434;435;470;471;506;514;549		107;121;580;591	CRQ	NHQ	CRQ	NYQ	SNE	NYQ			CRQNHQCRQNYQSNENYQ	18						HRQPYECRQNHQCRQNYQSNENYQ	0
T.tonsurans.fa__TESG_00225T0	T.tonsurans.fa	TESG_00225T0	26		Puf4	Puf4		Puf4		S.cerevisiae.fa__YGL014W	N.crassa.fa__NCU11956T0	Puf4	Puf4	Puf4	Puf4	Puf4	Puf4		8	8	623;658;659;694;695;731;732;767;768;803;804;839;840;875;878;913		29;47;390;396;406;422;535;546;944;951;1023;1042	CRQ	NYQ	TRQ	NHQ	CCQ	NYQ	SNE	NYQ	CRQNYQTRQNHQCCQNYQSNENYQ	24	Puf4			Puf4		NA	NA
T.tonsurans.fa__TESG_07542T0	T.tonsurans.fa	TESG_07542T0	26		Puf6			Puf6		NA	N.crassa.fa__NCU09380T0	NA	Puf6	NA	NA	NA	Puf6		4	0	156;191;192;227;228;264;350;385		28;86;415;431;529;546	VRQ	KFG	SWD	ARC					VRQKFGSWDARC	12						NA	NA
T.tonsurans.fa__TESG_00492T0	T.tonsurans.fa	TESG_00492T0	26		Puf8	Puf8		Puf8		NA	N.crassa.fa__NCU01760T0	NA	Puf8	NA	Puf8	Puf8	Puf8		8	8	474;509;510;545;546;581;582;617;622;657;658;693;694;729;738;773		431;452	SIQ	NFQ	CHQ	CHQ	SLQ	NWQ	SKE	NYQ	SIQNFQCHQCHQSLQNWQSKENYQ	24	Puf8			Puf8		NA	NA
T.equinum.fa__TEQG_06026T0	T.equinum.fa	TEQG_06026T0	27				?	?		NA	NA	NA	NA	NA	NA	NA			0	0			43;57;186;198										0						NA	NA
T.equinum.fa__TEQG_08415T0	T.equinum.fa	TEQG_08415T0	27		Nop9			Nop9		S.cerevisiae.fa__YJL010C	N.crassa.fa__NCU06118T0	Nop9	Nop9	Nop9	Nop9	Nop9	Nop9		4	4	113;148;149;184;364;399;401;436		3;17;681;689	SRE	SHE	SRE	SYI					SRESHESRESYI	12						NA	NA
T.equinum.fa__TEQG_01260T0	T.equinum.fa	TEQG_01260T0	27		Puf1	Puf1 or Puf2		Puf1		S.cerevisiae.fa__YJR091C	N.crassa.fa__NCU06199T0	Puf1	Puf1	Puf1	Puf1	Puf1	Puf1		6	6	680;715;716;752;753;787;788;824;826;861;863;899	473;542	17;33;166;175;246;259;361;374;941;955;970;977;1084;1095;1103;1111	NTQ	TWQ	NYQ	ARR	ALT	YLL			NTQTWQNYQARRALTYLL	18		Puf1 or Puf2	Puf1 or 2 - has RRM	Puf1 or Puf2		NA	NA
T.equinum.fa__TEQG_02915T0	T.equinum.fa	TEQG_02915T0	27		Puf4	Puf4		Puf4		S.cerevisiae.fa__YGL014W	N.crassa.fa__NCU11956T0	Puf4	Puf4	Puf4	Puf4	Puf4	Puf4		8	8	623;658;659;694;695;731;732;767;768;803;804;839;840;875;878;913		29;47;390;396;406;422;535;546;944;951;1023;1042	CRQ	NYQ	TRQ	NHQ	CCQ	NYQ	SNE	NYQ	CRQNYQTRQNHQCCQNYQSNENYQ	24	Puf4			Puf4		NA	NA
T.equinum.fa__TEQG_04018T0	T.equinum.fa	TEQG_04018T0	27		Puf6			Puf6		NA	N.crassa.fa__NCU09380T0	NA	Puf6	NA	NA	NA	Puf6		4	0	180;215;216;251;252;288;374;409		28;86;439;455;553;570;643;654	VRQ	KFG	SWD	ARC					VRQKFGSWDARC	12						NA	NA
T.equinum.fa__TEQG_03139T0	T.equinum.fa	TEQG_03139T0	27		Puf8	Puf8		Puf8		NA	N.crassa.fa__NCU01760T0	NA	Puf8	NA	Puf8	Puf8	Puf8		8	8	474;509;510;545;546;581;582;617;622;657;658;693;694;729;738;773		431;452	SIQ	NFQ	CHQ	CHQ	SLQ	NWQ	SKE	NYQ	SIQNFQCHQCHQSLQNWQSKENYQ	24	Puf8			Puf8		NA	NA
T.rubrum.fa__TERG_00232T0	T.rubrum.fa	TERG_00232T0	28		Nop9			Nop9		S.cerevisiae.fa__YJL010C	N.crassa.fa__NCU06118T0	Nop9	Nop9	Nop9	Nop9	Nop9	Nop9		4	4	110;145;146;181;361;396;398;433		3;14;678;686	SRE	SHE	SRE	SYI					SRESHESRESYI	12						NA	NA
T.rubrum.fa__TERG_04970T0	T.rubrum.fa	TERG_04970T0	28		Puf1	Puf1 or Puf2		Puf1		S.cerevisiae.fa__YJR091C	N.crassa.fa__NCU06199T0	Puf1	Puf1	Puf1	Puf1	Puf1	Puf1		6	6	493;528;529;565;566;600;601;637;639;674;676;712	286;355	59;72;174;187;754;768;783;790;897;908;916;935;950;959	NTQ	TWQ	NYQ	ARR	ALT	YLL			NTQTWQNYQARRALTYLL	18		Puf1 or Puf2	Puf1 or 2 - has RRM	Puf1 or Puf2		NA	NA
T.rubrum.fa__TERG_01212T0	T.rubrum.fa	TERG_01212T0	28		Puf3	Puf3		Puf3		S.cerevisiae.fa__YLL013C	N.crassa.fa__NCU06511T0	Puf3	Puf3	Puf3	Puf3	Puf3	Puf3		8	8	507;542;543;578;579;614;615;650;651;686;687;722;723;758;766;801		106;120;271;280;832;843	SRQ	NYQ	CRQ	NHQ	CRQ	NYQ	SNE	NYQ	SRQNYQCRQNHQCRQNYQSNENYQ	24	Puf3			Puf3		SRQNYQCRQNHQCRQNYQSNENYQ	1
T.rubrum.fa__TERG_04136T0	T.rubrum.fa	TERG_04136T0	28		Puf4	Puf4		Puf4		S.cerevisiae.fa__YGL014W	N.crassa.fa__NCU11956T0	Puf4	Puf4	Puf4	Puf4	Puf4	Puf4		8	8	623;658;659;694;695;731;732;767;768;803;804;839;840;875;878;913		29;46;406;422;535;546;944;951;1023;1042	CRQ	NYQ	TRQ	NHQ	CCQ	NYQ	SNE	NYQ	CRQNYQTRQNHQCCQNYQSNENYQ	24	Puf4			Puf4		NA	NA
T.rubrum.fa__TERG_05242T0	T.rubrum.fa	TERG_05242T0	28		Puf6			Puf6		NA	N.crassa.fa__NCU09380T0	NA	Puf6	NA	NA	NA	Puf6		4	0	157;192;193;228;229;265;351;386		416;432;530;543	VRQ	KFG	SWD	ARC					VRQKFGSWDARC	12						NA	NA
T.rubrum.fa__TERG_04493T0	T.rubrum.fa	TERG_04493T0	28		Puf8	Puf8		Puf8		NA	N.crassa.fa__NCU01760T0	NA	Puf8	NA	Puf8	Puf8	Puf8		8	8	474;509;510;545;546;581;582;617;622;657;658;693;694;729;738;773		434;451	SIQ	NFQ	CHQ	CHQ	SLQ	NWQ	SKE	NYQ	SIQNFQCHQCHQSLQNWQSKENYQ	24	Puf8			Puf8		NA	NA
A.benhamiae.fa__ARB_05412	A.benhamiae.fa	ARB_05412	29		Nop9			Nop9		S.cerevisiae.fa__YJL010C	N.crassa.fa__NCU06118T0	Nop9	Nop9	Nop9	Nop9	Nop9	Nop9		5	5	110;145;146;181;361;396;398;433;538;575		3;14;678;686	SRE	SHE	SRE	SYI	SRQ				SRESHESRESYISRQ	15						NA	NA
A.benhamiae.fa__ARB_03872	A.benhamiae.fa	ARB_03872	29		Puf1	Puf1 or Puf2		Puf1		S.cerevisiae.fa__YJR091C	N.crassa.fa__NCU06199T0	Puf1	Puf1	Puf1	Puf1	Puf1	Puf1		6	6	680;715;716;752;753;787;788;824;826;861;863;899	473;542	17;33;166;175;246;259;361;374;941;955;1083;1094;1102;1121	NTQ	TWQ	NYQ	ARR	ALT	YLL			NTQTWQNYQARRALTYLL	18		Puf1 or Puf2	Puf1 or 2 - has RRM	Puf1 or Puf2		NA	NA
A.benhamiae.fa__ARB_07570	A.benhamiae.fa	ARB_07570	29		Puf3	Puf3		Puf3		S.cerevisiae.fa__YLL013C	N.crassa.fa__NCU06511T0	Puf3	Puf3	Puf3	Puf3	Puf3	Puf3		8	8	480;515;516;551;552;587;588;623;624;659;660;695;696;731;739;774		79;88;244;253;805;816	SRQ	NYQ	CRQ	NHQ	CRQ	NYQ	SNE	NYQ	SRQNYQCRQNHQCRQNYQSNENYQ	24	Puf3			Puf3		SRQNYQCRQNHQCRQNYQSNENYQ	1
A.benhamiae.fa__ARB_07066	A.benhamiae.fa	ARB_07066	29		Puf4	Puf4		Puf4		S.cerevisiae.fa__YGL014W	N.crassa.fa__NCU11956T0	Puf4	Puf4	Puf4	Puf4	Puf4	Puf4		8	8	668;703;704;739;740;776;777;812;813;848;849;884;885;920;923;958		29;47;132;156;451;467;580;591;989;996;1068;1087	CRQ	NYQ	TRQ	NHQ	CCQ	NYQ	SNE	NYQ	CRQNYQTRQNHQCCQNYQSNENYQ	24	Puf4			Puf4		NA	NA
A.benhamiae.fa__ARB_03183	A.benhamiae.fa	ARB_03183	29		Puf6			Puf6		S.cerevisiae.fa__YDR496C	N.crassa.fa__NCU09380T0	Puf6	Puf6	Puf6	Puf6	Puf6	Puf6		0	0			422;438;536;549										0						NA	NA
A.benhamiae.fa__ARB_06905	A.benhamiae.fa	ARB_06905	29		Puf8	Puf8		Puf8		NA	N.crassa.fa__NCU01760T0	NA	Puf8	NA	Puf8	Puf8	Puf8		7	7	403;438;439;474;475;510;511;546;551;586;587;622;623;658		363;380	SIQ	NFQ	CHQ	CHQ	SLQ	NWQ	SKE		SIQNFQCHQCHQSLQNWQSKE	21		Puf8 - missing rep8		Puf8		NA	NA
T.verrucosum.fa__TRV_03859	T.verrucosum.fa	TRV_03859	30		Nop9			Nop9		S.cerevisiae.fa__YJL010C	N.crassa.fa__NCU06118T0	Nop9	Nop9	Nop9	Nop9	Nop9	Nop9		6	6	110;145;146;181;361;396;398;433;538;575;576;613		3;14;678;686	SRE	SHE	SRE	SYI	SRQ	SHD			SRESHESRESYISRQSHD	18						NA	NA
T.verrucosum.fa__TRV_06639	T.verrucosum.fa	TRV_06639	30		Puf1	Puf1 or Puf2		Puf1		S.cerevisiae.fa__YJR091C	N.crassa.fa__NCU06199T0	Puf1	Puf1	Puf1	Puf1	Puf1	Puf1		6	6	680;715;716;752;753;787;788;824;826;861;863;899	473;542	17;33;166;175;246;259;361;374;941;955;1083;1094;1102;1121	NTQ	TWQ	NYQ	ARR	ALT	YLL			NTQTWQNYQARRALTYLL	18		Puf1 or Puf2	Puf1 or 2 - has RRM	Puf1 or Puf2		NA	NA
T.verrucosum.fa__TRV_07018	T.verrucosum.fa	TRV_07018	30		Puf3	Puf3		Puf3		S.cerevisiae.fa__YLL013C	N.crassa.fa__NCU06511T0	Puf3	Puf3	Puf3	Puf3	Puf3	Puf3		8	8	448;483;484;519;520;555;556;591;592;627;628;663;664;699;707;742		47;61;212;221;773;784	SRQ	NYQ	CRQ	NHQ	CRQ	NYQ	SNE	NYQ	SRQNYQCRQNHQCRQNYQSNENYQ	24	Puf3			Puf3		SRQNYQCRQNHQCRQNYQSNENYQ	1
T.verrucosum.fa__TRV_05699	T.verrucosum.fa	TRV_05699	30		Puf4	Puf4		Puf4		S.cerevisiae.fa__YGL014W	N.crassa.fa__NCU11956T0	Puf4	Puf4	Puf4	Puf4	Puf4	Puf4		8	8	501;536;537;572;573;609;610;645;646;681;682;717;718;753;756;791		268;274;284;300;413;424;822;829;901;920	CRQ	NYQ	TRQ	NHQ	CCQ	NYQ	SNE	NYQ	CRQNYQTRQNHQCCQNYQSNENYQ	24	Puf4			Puf4		NA	NA
T.verrucosum.fa__TRV_03928	T.verrucosum.fa	TRV_03928	30		Puf6			Puf6		S.cerevisiae.fa__YDR496C	N.crassa.fa__NCU09380T0	Puf6	Puf6	Puf6	Puf6	Puf6	Puf6		0	0			90;102;294;370;688;704;802;820										0						NA	NA
T.verrucosum.fa__TRV_05935	T.verrucosum.fa	TRV_05935	30		Puf8	Puf8		Puf8		NA	N.crassa.fa__NCU01760T0	NA	Puf8	NA	Puf8	Puf8	Puf8		7	7	403;438;439;474;475;510;511;546;551;586;587;622;623;658		363;380	SIQ	NFQ	CHQ	CHQ	SLQ	NWQ	SKE		SIQNFQCHQCHQSLQNWQSKE	21		Puf8 - missing rep8		Puf8		NA	NA
M.gypseum.fa__MGYG_08923T0	M.gypseum.fa	MGYG_08923T0	31		Nop9			Nop9		S.cerevisiae.fa__YJL010C	N.crassa.fa__NCU06118T0	Nop9	Nop9	Nop9	Nop9	Nop9	Nop9		4	0	129;164;344;379;381;416;524;561		3;14;664;672	SHE	SRE	SYI	SRQ					SHESRESYISRQ	12						NA	NA
M.gypseum.fa__MGYG_03148T0	M.gypseum.fa	MGYG_03148T0	31		Puf1	Puf1 or Puf2		Puf1		S.cerevisiae.fa__YJR091C	N.crassa.fa__NCU06199T0	Puf1	Puf1	Puf1	Puf1	Puf1	Puf1		6	6	472;507;508;544;545;579;580;616;618;653;655;691	265;334	38;51;153;166;733;747;762;769;892;914;929;943	NTQ	TWQ	NYQ	ARR	ALT	YLL			NTQTWQNYQARRALTYLL	18		Puf1 or Puf2	Puf1 or 2 - has RRM	Puf1 or Puf2		NA	NA
M.gypseum.fa__MGYG_00317T0	M.gypseum.fa	MGYG_00317T0	31		Puf3	Puf3		Puf3		S.cerevisiae.fa__YLL013C	N.crassa.fa__NCU06511T0	Puf3	Puf3	Puf3	Puf3	Puf3	Puf3		8	8	510;545;546;581;582;617;618;653;654;689;690;725;726;761;769;804		162;173;269;281	SRQ	NYQ	CRQ	NHQ	CRQ	NYQ	SNE	NYQ	SRQNYQCRQNHQCRQNYQSNENYQ	24	Puf3			Puf3		SRQNYQCRQNHQCRQNYQSNENYQ	1
M.gypseum.fa__MGYG_03789T0	M.gypseum.fa	MGYG_03789T0	31		Puf4	Puf4		Puf4		S.cerevisiae.fa__YGL014W	N.crassa.fa__NCU11956T0	Puf4	Puf4	Puf4	Puf4	Puf4	Puf4		8	8	585;620;621;656;657;693;694;729;730;765;766;802;809;844;847;882		21;39;348;357;496;507;913;920;992;1011	CRQ	NYQ	TRQ	NHQ	CCQ	NYQ	SNE	NYQ	CRQNYQTRQNHQCCQNYQSNENYQ	24	Puf4			Puf4		NA	NA
M.gypseum.fa__MGYG_03407T0	M.gypseum.fa	MGYG_03407T0	31		Puf6			Puf6		S.cerevisiae.fa__YDR496C	N.crassa.fa__NCU09380T0	Puf6	Puf6	Puf6	Puf6	Puf6	Puf6		4	0	155;190;191;226;227;263;349;384		14;27;46;84;414;430;537;551	VRQ	KFG	SWD	ARC					VRQKFGSWDARC	12						NA	NA
M.gypseum.fa__MGYG_04164T0	M.gypseum.fa	MGYG_04164T0	31		Puf8	Puf8		Puf8		NA	N.crassa.fa__NCU01760T0	NA	Puf8	NA	Puf8	Puf8	Puf8		8	8	471;506;507;542;543;578;579;614;619;654;655;690;691;726;735;770		428;451	SIQ	NFQ	CHQ	CHQ	SLQ	NWQ	SKE	NYQ	SIQNFQCHQCHQSLQNWQSKENYQ	24	Puf8			Puf8		NA	NA
M.canis.fa__MCYG_08786T0	M.canis.fa	MCYG_08786T0	32		Nop9			Nop9		S.cerevisiae.fa__YJL010C	N.crassa.fa__NCU06118T0	Nop9	Nop9	Nop9	Nop9	Nop9	Nop9		6	6	110;145;146;181;361;396;398;433;539;576;577;614		3;14;241;246;656;668;678;686	SRE	SHE	SRE	SYI	SRQ	SHD			SRESHESRESYISRQSHD	18						NA	NA
M.canis.fa__MCYG_03539T0	M.canis.fa	MCYG_03539T0	32		Puf1	Puf1 or Puf2		Puf1		S.cerevisiae.fa__YJR091C	N.crassa.fa__NCU06199T0	Puf1	Puf1	Puf1	Puf1	Puf1	Puf1		6	6	678;713;714;750;751;785;786;822;824;859;861;897	471;540	17;32;165;174;245;258;289;318;359;372;939;953;1081;1092;1100;1117;1132;1146	NTQ	TWQ	NYQ	ARR	ALT	YLL			NTQTWQNYQARRALTYLL	18		Puf1 or Puf2	Puf1 or 2 - has RRM	Puf1 or Puf2		NA	NA
M.canis.fa__MCYG_03153T0	M.canis.fa	MCYG_03153T0	32		Puf3	Puf3		Puf3		S.cerevisiae.fa__YLL013C	N.crassa.fa__NCU06511T0	Puf3	Puf3	Puf3	Puf3	Puf3	Puf3		8	8	507;542;543;578;579;614;615;650;651;686;687;722;723;758;766;801		71;82;105;114;161;172;266;275;834;840	SRQ	NYQ	CRQ	NHQ	CRQ	NYQ	SNE	NYQ	SRQNYQCRQNHQCRQNYQSNENYQ	24	Puf3			Puf3		SRQNYQCRQNHQCRQNYQSNENYQ	1
M.canis.fa__MCYG_06825T0	M.canis.fa	MCYG_06825T0	32		Puf4	Puf4		Puf4		S.cerevisiae.fa__YGL014W	N.crassa.fa__NCU11956T0	Puf4	Puf4	Puf4	Puf4	Puf4	Puf4		8	8	609;644;645;680;681;717;718;753;754;789;790;825;826;861;864;899		29;46;485;498;520;527;975;988;1010;1029	CRQ	NYQ	TRQ	NHQ	CCQ	NYQ	SNE	NYQ	CRQNYQTRQNHQCCQNYQSNENYQ	24	Puf4			Puf4		NA	NA
M.canis.fa__MCYG_03799T0	M.canis.fa	MCYG_03799T0	32		Puf6			Puf6		S.cerevisiae.fa__YDR496C	N.crassa.fa__NCU09380T0	Puf6	Puf6	Puf6	Puf6	Puf6	Puf6		0	0			14;27;47;86;425;442;539;552;642;654										0						NA	NA
M.canis.fa__MCYG_01907T0	M.canis.fa	MCYG_01907T0	32		Puf8	Puf8		Puf8		NA	N.crassa.fa__NCU01760T0	NA	Puf8	NA	Puf8	Puf8	Puf8		8	8	446;481;482;517;518;553;554;589;594;629;630;665;666;701;710;745		328;340	SIQ	NFQ	CHQ	CHQ	SLQ	NWQ	SKE	NYQ	SIQNFQCHQCHQSLQNWQSKENYQ	24	Puf8			Puf8		NA	NA
C.immitis.fa__CIMG_03801T0	C.immitis.fa	CIMG_03801T0	33		Nop9			Nop9		S.cerevisiae.fa__YJL010C	N.crassa.fa__NCU06118T0	Nop9	Nop9	Nop9	Nop9	Nop9	Nop9		7	7	117;152;153;188;303;339;357;392;394;429;536;573;574;610		698;722	SRE	SHE	SPQ	SRE	SYV	SRQ	SHD		SRESHESPQSRESYVSRQSHD	21						NA	NA
C.immitis.fa__CIMG_00764T0	C.immitis.fa	CIMG_00764T0	33		Puf1	Puf1 or Puf2		Puf1		S.cerevisiae.fa__YJR091C	N.crassa.fa__NCU06199T0	Puf1	Puf1	Puf1	Puf1	Puf1	Puf1		6	6	679;714;715;751;752;786;787;823;825;860;862;898	475;544	17;33;165;178;239;252;289;307;362;375;572;584;940;953;1167;1190	NTQ	TWQ	NYQ	ARR	ALT	YLL			NTQTWQNYQARRALTYLL	18		Puf1 or Puf2	Puf1 or 2 - has RRM	Puf1 or Puf2		NA	NA
C.immitis.fa__CIMG_10215T0	C.immitis.fa	CIMG_10215T0	33		Puf3	Puf3		Puf3		S.cerevisiae.fa__YLL013C	N.crassa.fa__NCU06511T0	Puf3	Puf3	Puf3	Puf3	Puf3	Puf3		8	8	493;528;529;564;565;600;601;636;637;672;673;708;709;744;752;787		144;158;243;254;843;863	SRQ	NYQ	CRQ	NHQ	CRQ	NYQ	SNE	NYQ	SRQNYQCRQNHQCRQNYQSNENYQ	24	Puf3			Puf3		SRQNYQCRQNHQCRQNYQSNENYQ	1
C.immitis.fa__CIMG_11716T0	C.immitis.fa	CIMG_11716T0	33		Puf4	Puf4		Puf4		S.cerevisiae.fa__YGL014W	N.crassa.fa__NCU11956T0	Puf4	Puf4	Puf4	Puf4	Puf4	Puf4		8	8	601;636;637;672;673;709;710;745;746;781;782;817;818;853;856;891		22;39;251;269;283;293;326;338;408;423;449;458;962;972	CRQ	NYQ	TRQ	NHQ	CCQ	NYQ	SNE	NYQ	CRQNYQTRQNHQCCQNYQSNENYQ	24	Puf4			Puf4		NA	NA
C.immitis.fa__CIMG_08960T0	C.immitis.fa	CIMG_08960T0	33	same gene as CIMG_08960T1			Puf6	Puf6		NA	NA	NA	NA	NA	NA	NA			4	0	156;191;192;227;228;264;351;386			VRQ	KFA	SWD	SRC					VRQKFASWDSRC	12						NA	NA
C.immitis.fa__CIMG_08960T1	C.immitis.fa	CIMG_08960T1	33	same gene as CIMG_08960T0	Puf6			Puf6		S.cerevisiae.fa__YDR496C	N.crassa.fa__NCU09380T0	Puf6	Puf6	Puf6	Puf6	Puf6	Puf6		4	0	156;191;192;227;228;264;351;386			VRQ	KFA	SWD	SRC					VRQKFASWDSRC	12						NA	NA
C.immitis.fa__CIMG_06323T0	C.immitis.fa	CIMG_06323T0	33		Puf8	Puf8		Puf8		NA	N.crassa.fa__NCU01760T0	NA	Puf8	NA	Puf8	Puf8	Puf8		8	8	375;410;411;446;447;482;483;518;523;558;559;594;595;630;639;674			SIQ	NFQ	CHQ	CHQ	SLQ	NWQ	SKE	NYQ	SIQNFQCHQCHQSLQNWQSKENYQ	24	Puf8			Puf8		NA	NA
C.posadasii.fa__CPAT_09488	C.posadasii.fa	CPAT_09488	34		Nop9			Nop9		S.cerevisiae.fa__YJL010C	N.crassa.fa__NCU06118T0	Nop9	Nop9	Nop9	Nop9	Nop9	Nop9		7	7	134;169;170;205;320;356;374;409;411;446;553;590;591;627		724;739	SRE	SHE	SPQ	SRE	SYV	SRQ	SHD		SRESHESPQSRESYVSRQSHD	21						NA	NA
C.posadasii.fa__CPAT_02128	C.posadasii.fa	CPAT_02128	34		Puf1	Puf1 or Puf2		Puf1		S.cerevisiae.fa__YJR091C	N.crassa.fa__NCU06199T0	Puf1	Puf1	Puf1	Puf1	Puf1	Puf1		6	6	392;427;428;464;465;499;500;536;538;573;575;611	188;257	3;20;75;88;285;297;306;317;653;666;880;903	NTQ	TWQ	NYQ	ARR	ALT	YLL			NTQTWQNYQARRALTYLL	18		Puf1 or Puf2	Puf1 or 2 - has RRM	Puf1 or Puf2		NA	NA
C.posadasii.fa__CPAT_07792	C.posadasii.fa	CPAT_07792	34		Puf3	Puf3		Puf3		S.cerevisiae.fa__YLL013C	N.crassa.fa__NCU06511T0	Puf3	Puf3	Puf3	Puf3	Puf3	Puf3		8	8	290;325;326;361;362;397;398;433;434;469;470;505;506;541;549;584		612;621;640;660	SRQ	NYQ	CRQ	NHQ	CRQ	NYQ	SNE	NYQ	SRQNYQCRQNHQCRQNYQSNENYQ	24	Puf3			Puf3		SRQNYQCRQNHQCRQNYQSNENYQ	1
C.posadasii.fa__CPAT_03668	C.posadasii.fa	CPAT_03668	34		Puf4	Puf4		Puf4		S.cerevisiae.fa__YGL014W	N.crassa.fa__NCU11956T0	Puf4	Puf4	Puf4	Puf4	Puf4	Puf4		8	8	597;632;633;668;669;705;706;741;742;777;778;813;814;849;852;887		18;35;247;265;279;289;322;334;404;419;445;454;958;968	CRQ	NYQ	TRQ	NHQ	CCQ	NYQ	SNE	NYQ	CRQNYQTRQNHQCCQNYQSNENYQ	24	Puf4			Puf4		NA	NA
C.posadasii.fa__CPAT_07920	C.posadasii.fa	CPAT_07920	34		Puf6			Puf6		S.cerevisiae.fa__YDR496C	N.crassa.fa__NCU09380T0	Puf6	Puf6	Puf6	Puf6	Puf6	Puf6		4	0	157;192;193;228;229;265;352;387			VRQ	KFA	SWD	SRC					VRQKFASWDSRC	12						NA	NA
C.posadasii.fa__CPAT_03702	C.posadasii.fa	CPAT_03702	34		Puf8	Puf8		Puf8		NA	N.crassa.fa__NCU01760T0	NA	Puf8	NA	Puf8	Puf8	Puf8		8	8	403;438;439;474;475;510;511;546;551;586;587;622;623;658;667;702			SIQ	NFQ	CHQ	CHQ	SLQ	NWQ	SKE	NYQ	SIQNFQCHQCHQSLQNWQSKENYQ	24	Puf8			Puf8		NA	NA
U.reesii.fa__URET_07484	U.reesii.fa	URET_07484	35		Nop9			Nop9		S.cerevisiae.fa__YJL010C	N.crassa.fa__NCU06118T0	Nop9	Nop9	Nop9	Nop9	Nop9	Nop9		0	0			3;26										0						NA	NA
U.reesii.fa__URET_00739	U.reesii.fa	URET_00739	35		Puf1	Puf1 or Puf2		Puf1		S.cerevisiae.fa__YJR091C	N.crassa.fa__NCU06199T0	Puf1	Puf1	Puf1	Puf1	Puf1	Puf1		6	6	615;650;651;687;688;722;723;759;761;796;798;834	411;480	17;33;106;125;230;252;298;311;318;336;512;524;529;540;977;988;1080;1097;1104;1118	NTQ	TWQ	NYQ	ARR	ALT	YLL			NTQTWQNYQARRALTYLL	18		Puf1 or Puf2	Puf1 or 2 - has RRM	Puf1 or Puf2		NA	NA
U.reesii.fa__URET_03509	U.reesii.fa	URET_03509	35		Puf3	Puf3		Puf3		S.cerevisiae.fa__YLL013C	N.crassa.fa__NCU06511T0	Puf3	Puf3	Puf3	Puf3	Puf3	Puf3		8	8	498;533;534;569;570;605;606;641;642;677;678;713;714;749;756;791		228;241;854;867	SRQ	NYQ	CRQ	NHQ	CRQ	NYQ	SNE	NYQ	SRQNYQCRQNHQCRQNYQSNENYQ	24	Puf3			Puf3		SRQNYQCRQNHQCRQNYQSNENYQ	1
U.reesii.fa__URET_04099	U.reesii.fa	URET_04099	35		Puf4	Puf4		Puf4		S.cerevisiae.fa__YGL014W	N.crassa.fa__NCU11956T0	Puf4	Puf4	Puf4	Puf4	Puf4	Puf4		6	6	770;805;806;841;842;878;879;915;936;971;974;1009		198;215;392;403;423;444;499;513;1101;1113	CRQ	NYQ	TRQ	NHQ	SNE	NYQ			CRQNYQTRQNHQSNENYQ	18		Puf4 - missing rep5-6		Puf4		NA	NA
U.reesii.fa__URET_03414	U.reesii.fa	URET_03414	35		Puf6			Puf6		S.cerevisiae.fa__YDR496C	N.crassa.fa__NCU09380T0	Puf6	Puf6	Puf6	Puf6	Puf6	Puf6		0	0			29;43;521;531										0						NA	NA
U.reesii.fa__URET_04073	U.reesii.fa	URET_04073	35		Puf8	Puf8		Puf8		NA	N.crassa.fa__NCU01760T0	NA	Puf8	NA	Puf8	Puf8	Puf8		8	8	400;435;436;471;472;507;508;543;548;583;584;619;620;655;664;699		6;13	SIQ	NFQ	CHQ	CHQ	SLQ	NWQ	SKE	NYQ	SIQNFQCHQCHQSLQNWQSKENYQ	24	Puf8			Puf8		NA	NA
H.capsulatum.fa__HCAG_06586T0	H.capsulatum.fa	HCAG_06586T0	36		Nop9			Nop9		S.cerevisiae.fa__YJL010C	N.crassa.fa__NCU06118T0	Nop9	Nop9	Nop9	Nop9	Nop9	Nop9		7	7	108;143;144;178;208;243;293;329;348;383;385;420;526;563		3;22	SRE	SHE	SHR	NPQ	SRE	GHA	SHQ		SRESHESHRNPQSREGHASHQ	21						NA	NA
H.capsulatum.fa__HCAG_00994T0	H.capsulatum.fa	HCAG_00994T0	36		Puf1	Puf1 or Puf2		Puf1		S.cerevisiae.fa__YJR091C	N.crassa.fa__NCU06199T0	Puf1	Puf1	Puf1	Puf1	Puf1	Puf1		6	6	641;676;677;713;714;748;749;785;787;822;824;860	428;497	23;31;37;61;159;177;185;194;304;321;902;916;929;939;1029;1038;1118;1129;1136;1146	NTQ	TWQ	NYQ	ARR	ALT	YLL			NTQTWQNYQARRALTYLL	18		Puf1 or Puf2	Puf1 or 2 - has RRM	Puf1 or Puf2		NA	NA
H.capsulatum.fa__HCAG_10689T0	H.capsulatum.fa	HCAG_10689T0	36		Puf3	Puf3		Puf3		S.cerevisiae.fa__YLL013C	N.crassa.fa__NCU06511T0	Puf3	Puf3	Puf3	Puf3	Puf3	Puf3		7	7	460;495;496;531;532;567;568;603;604;639;640;675;683;718		88;102;145;163;284;298;773;805	NYQ	CRQ	NHQ	CRQ	NYQ	SNE	NYQ		NYQCRQNHQCRQNYQSNENYQ	21		Puf3 - rep1 missing		Puf3		--QNYQCRQNHQCRQNYQSNENYQ	0
H.capsulatum.fa__HCAG_06968T0	H.capsulatum.fa	HCAG_06968T0	36		Puf4	Puf4		Puf4		S.cerevisiae.fa__YGL014W	N.crassa.fa__NCU11956T0	Puf4	Puf4	Puf4	Puf4	Puf4	Puf4		8	8	742;777;778;813;814;850;851;886;887;922;923;958;959;994;997;1032		2;25;154;171;393;406;417;436;464;481;587;598;719;736;1107;1132	CRQ	NYQ	TRQ	NHQ	CCQ	NYQ	SNE	NYQ	CRQNYQTRQNHQCCQNYQSNENYQ	24	Puf4			Puf4		NA	NA
H.capsulatum.fa__HCAG_10278T0	H.capsulatum.fa	HCAG_10278T0	36		Puf6			Puf6		S.cerevisiae.fa__YDR496C	N.crassa.fa__NCU09380T0	Puf6	Puf6	Puf6	Puf6	Puf6	Puf6		4	4	169;204;205;240;241;277;364;399		31;77	VRQ	KFG	SWD	ARS					VRQKFGSWDARS	12						NA	NA
H.capsulatum.fa__HCAG_06932T0	H.capsulatum.fa	HCAG_06932T0	36		Puf8	Puf8		Puf8		NA	N.crassa.fa__NCU01760T0	NA	Puf8	NA	Puf8	Puf8	Puf8		8	8	436;471;472;507;508;543;544;579;584;619;620;655;656;691;700;735		85;96	SIQ	NFQ	CHQ	CHQ	SLQ	NWQ	SKE	NYQ	SIQNFQCHQCHQSLQNWQSKENYQ	24	Puf8			Puf8		NA	NA
B.dermatitidis.fa__BDBG_02872T0	B.dermatitidis.fa	BDBG_02872T0	37		Nop9			Nop9		S.cerevisiae.fa__YJL010C	N.crassa.fa__NCU06118T0	Nop9	Nop9	Nop9	Nop9	Nop9	Nop9		0	0			3;21										0						NA	NA
B.dermatitidis.fa__BDBG_08030T0	B.dermatitidis.fa	BDBG_08030T0	37		Puf1	Puf1 or Puf2		Puf1		S.cerevisiae.fa__YJR091C	N.crassa.fa__NCU06199T0	Puf1	Puf1	Puf1	Puf1	Puf1	Puf1		6	6	692;727;728;764;765;799;800;836;838;873;875;911	479;548	23;50;159;176;184;195;364;377;576;588;953;967;998;1010;1073;1084;1172;1204;1206;1214	NTQ	TWQ	NYQ	ARR	ALT	YLL			NTQTWQNYQARRALTYLL	18		Puf1 or Puf2	Puf1 or 2 - has RRM	Puf1 or Puf2		NA	NA
B.dermatitidis.fa__BDBG_05256T0	B.dermatitidis.fa	BDBG_05256T0	37		Puf3	Puf3		Puf3		S.cerevisiae.fa__YLL013C	N.crassa.fa__NCU06511T0	Puf3	Puf3	Puf3	Puf3	Puf3	Puf3		8	8	514;549;550;585;586;621;622;657;658;693;694;729;730;765;773;808		72;82;264;276	SRQ	NYQ	CRQ	NHQ	CRQ	NYQ	SNE	NYQ	SRQNYQCRQNHQCRQNYQSNENYQ	24	Puf3			Puf3		SRQNYQCRQNHQCRQNYQSNENYQ	1
B.dermatitidis.fa__BDBG_05830T0	B.dermatitidis.fa	BDBG_05830T0	37		Puf4	Puf4		Puf4		S.cerevisiae.fa__YGL014W	N.crassa.fa__NCU11956T0	Puf4	Puf4	Puf4	Puf4	Puf4	Puf4		8	8	687;722;723;758;759;795;796;831;832;867;868;903;904;939;942;977		17;34;228;239;331;338;360;374;401;418;524;535;588;602;1055;1078	CRQ	NYQ	TRQ	NHQ	CCQ	NYQ	SNE	NYQ	CRQNYQTRQNHQCCQNYQSNENYQ	24	Puf4			Puf4		NA	NA
B.dermatitidis.fa__BDBG_06003T0	B.dermatitidis.fa	BDBG_06003T0	37		Puf6			Puf6		S.cerevisiae.fa__YDR496C	N.crassa.fa__NCU09380T0	Puf6	Puf6	Puf6	Puf6	Puf6	Puf6		4	4	157;192;193;228;229;265;352;387		15;46;51;64;540;547;629;640	VRQ	KFG	SWD	SRS					VRQKFGSWDSRS	12						NA	NA
B.dermatitidis.fa__BDBG_07847T0	B.dermatitidis.fa	BDBG_07847T0	37		Puf8	Puf8		Puf8		NA	N.crassa.fa__NCU01760T0	NA	Puf8	NA	Puf8	Puf8	Puf8		7	7	459;494;495;530;531;566;567;602;621;656;657;692;701;736			SIQ	NFQ	CHQ	CHQ	NWQ	SKE	NYQ		SIQNFQCHQCHQNWQSKENYQ	21		Puf8 - missing rep5		Puf8		NA	NA
P.brasiliensis.fa__PAAG_07209T0	P.brasiliensis.fa	PAAG_07209T0	38		Nop9			Nop9		S.cerevisiae.fa__YJL010C	N.crassa.fa__NCU06118T0	Nop9	Nop9	Nop9	Nop9	Nop9	Nop9		0	0			3;18;175;192;486;494										0						NA	NA
P.brasiliensis.fa__PAAG_02239T0	P.brasiliensis.fa	PAAG_02239T0	38		Puf1	Puf1 or Puf2		Puf1		S.cerevisiae.fa__YJR091C	N.crassa.fa__NCU06199T0	Puf1	Puf1	Puf1	Puf1	Puf1	Puf1		6	6	732;767;768;804;805;839;840;876;878;913;915;950	521;590	17;60;159;178;380;392;408;421;632;644;993;1009;1022;1030;1142;1154;1169;1182;1228;1241	NTQ	TWQ	NYQ	ARR	ALT	YLL			NTQTWQNYQARRALTYLL	18		Puf1 or Puf2	Puf1 or 2 - has RRM	Puf1 or Puf2		NA	NA
P.brasiliensis.fa__PAAG_04622T0	P.brasiliensis.fa	PAAG_04622T0	38		Puf3	Puf3		Puf3		S.cerevisiae.fa__YLL013C	N.crassa.fa__NCU06511T0	Puf3	Puf3	Puf3	Puf3	Puf3	Puf3		8	8	531;566;567;602;603;638;639;674;675;710;711;746;747;782;790;825		58;74;91;105;896;921	SRQ	NYQ	CRQ	NHQ	CRQ	NYQ	SNE	NYQ	SRQNYQCRQNHQCRQNYQSNENYQ	24	Puf3			Puf3		SRQNYQCRQNHQCRQNYQSNENYQ	1
P.brasiliensis.fa__PAAG_08069T0	P.brasiliensis.fa	PAAG_08069T0	38		Puf4	Puf4		Puf4		S.cerevisiae.fa__YGL014W	N.crassa.fa__NCU11956T0	Puf4	Puf4	Puf4	Puf4	Puf4	Puf4		8	8	606;641;642;677;678;714;715;750;751;786;787;822;823;858;861;896		229;241;244;262;279;293;560;573;928;937;944;955	CRQ	NYQ	TRQ	NHQ	CCQ	NYQ	SNE	NYQ	CRQNYQTRQNHQCCQNYQSNENYQ	24	Puf4			Puf4		NA	NA
P.brasiliensis.fa__PAAG_02883T0	P.brasiliensis.fa	PAAG_02883T0	38		Puf6			Puf6		S.cerevisiae.fa__YDR496C	N.crassa.fa__NCU09380T0	Puf6	Puf6	Puf6	Puf6	Puf6	Puf6		0	0			28;42;51;70;74;79;670;683										0						NA	NA
P.brasiliensis.fa__PAAG_09008T0	P.brasiliensis.fa	PAAG_09008T0	38		Puf8	Puf8		Puf8		NA	N.crassa.fa__NCU01760T0	NA	Puf8	NA	Puf8	Puf8	Puf8		8	8	365;400;401;436;437;472;473;508;513;548;549;584;585;620;629;664		2;16;34;43;267;281;290;311;726;739	SIQ	NFQ	CHQ	CHQ	SLQ	NWQ	SKE	NYQ	SIQNFQCHQCHQSLQNWQSKENYQ	24	Puf8			Puf8		NA	NA
A.nidulans.fa__ANID_10618T0	A.nidulans.fa	ANID_10618T0	39		Nop9			Nop9		S.cerevisiae.fa__YJL010C	N.crassa.fa__NCU06118T0	Nop9	Nop9	Nop9	Nop9	Nop9	Nop9		6	6	115;150;151;188;359;394;396;431;545;582;583;620		7;27;249;260	SRE	SHE	SRE	GYL	SRQ	SHD			SRESHESREGYLSRQSHD	18						NA	NA
A.nidulans.fa__ANID_07474T0	A.nidulans.fa	ANID_07474T0	39		Puf1	Puf1 or Puf2		Puf1		S.cerevisiae.fa__YJR091C	N.crassa.fa__NCU06199T0	Puf1	Puf1	Puf1	Puf1	Puf1	Puf1		6	6	680;715;716;752;753;787;788;824;826;861;863;898	480;549	164;177;193;207;245;258;364;377;453;463;1067;1085	NTQ	TWQ	NYQ	ARR	ALT	YLL			NTQTWQNYQARRALTYLL	18		Puf1 or Puf2	Puf1 or 2 - has RRM	Puf1 or Puf2		NA	NA
A.nidulans.fa__ANID_06587T0	A.nidulans.fa	ANID_06587T0	39		Puf3	Puf3		Puf3		S.cerevisiae.fa__YLL013C	N.crassa.fa__NCU06511T0	Puf3	Puf3	Puf3	Puf3	Puf3	Puf3		8	8	477;512;513;548;549;584;585;620;621;656;657;692;693;728;736;771		62;79;229;240;799;815	SRQ	NYQ	CRQ	NHQ	CRQ	NYQ	SNE	NYQ	SRQNYQCRQNHQCRQNYQSNENYQ	24	Puf3			Puf3		SRQNYQCRQNHQCRQNYQSNENYQ	1
A.nidulans.fa__ANID_12073T0	A.nidulans.fa	ANID_12073T0	39		Puf4	Puf4		Puf4		S.cerevisiae.fa__YGL014W	N.crassa.fa__NCU11956T0	Puf4	Puf4	Puf4	Puf4	Puf4	Puf4		8	8	588;623;624;659;660;696;697;732;733;768;769;804;805;840;843;878		15;30;342;352	CRQ	NYQ	TRQ	NHQ	CCQ	NYQ	SNE	NYQ	CRQNYQTRQNHQCCQNYQSNENYQ	24	Puf4			Puf4		NA	NA
A.nidulans.fa__ANID_10173T0	A.nidulans.fa	ANID_10173T0	39		Puf6			Puf6		S.cerevisiae.fa__YDR496C	N.crassa.fa__NCU09380T0	Puf6	Puf6	Puf6	Puf6	Puf6	Puf6		3	3	191;226;227;262;263;299		9;23;47;121	VRQ	KFG	SWD						VRQKFGSWD	9						NA	NA
A.nidulans.fa__ANID_04285T0	A.nidulans.fa	ANID_04285T0	39		Puf8	Puf8		Puf8		NA	N.crassa.fa__NCU01760T0	NA	Puf8	NA	Puf8	Puf8	Puf8		7	7	490;525;526;561;562;597;598;633;638;673;674;709;710;745			SIQ	NFQ	CHQ	CHQ	SLQ	NWQ	SKE		SIQNFQCHQCHQSLQNWQSKE	21		Puf8 - missing rep8		Puf8		NA	NA
A.fumigatus.fa__Afu3g11110	A.fumigatus.fa	Afu3g11110	40		Nop9			Nop9		S.cerevisiae.fa__YJL010C	N.crassa.fa__NCU06118T0	Nop9	Nop9	Nop9	Nop9	Nop9	Nop9		5	5	120;155;156;191;361;396;544;581;582;619		7;28;197;213;274;290;678;698	SRE	SHE	SRE	SRQ	SHD				SRESHESRESRQSHD	15						NA	NA
A.fumigatus.fa__Afu2g05610	A.fumigatus.fa	Afu2g05610	40		Puf1	Puf1 or Puf2		Puf1		S.cerevisiae.fa__YJR091C	N.crassa.fa__NCU06199T0	Puf1	Puf1	Puf1	Puf1	Puf1	Puf1		6	6	677;712;713;749;750;784;785;821;823;858;860;895	475;544	49;67;165;178;246;259;295;315;358;371;443;457;636;645;1069;1087;1170;1179	NTQ	TWQ	NYQ	ARR	ALT	YLL			NTQTWQNYQARRALTYLL	18		Puf1 or Puf2	Puf1 or 2 - has RRM	Puf1 or Puf2		NA	NA
A.fumigatus.fa__Afu6g04310	A.fumigatus.fa	Afu6g04310	40		Puf3	Puf3		Puf3		S.cerevisiae.fa__YLL013C	N.crassa.fa__NCU06511T0	Puf3	Puf3	Puf3	Puf3	Puf3	Puf3		8	8	491;526;527;562;563;598;599;634;635;670;671;706;707;742;750;785		54;70;129;139;822;841;852;865;883;902	SRQ	NYQ	CRQ	NHQ	CRQ	NYQ	SNE	NYQ	SRQNYQCRQNHQCRQNYQSNENYQ	24	Puf3			Puf3		SRQNYQCRQNHQCRQNYQSNENYQ	1
A.fumigatus.fa__Afu1g02510	A.fumigatus.fa	Afu1g02510	40		Puf4	Puf4		Puf4		S.cerevisiae.fa__YGL014W	N.crassa.fa__NCU11956T0	Puf4	Puf4	Puf4	Puf4	Puf4	Puf4		8	8	645;680;681;716;717;753;754;789;790;825;826;861;862;897;900;935		30;39;99;108;371;388;398;408;601;610;983;992;1019;1034	CRQ	NYQ	TRQ	NHQ	CCQ	NYQ	SNE	NYQ	CRQNYQTRQNHQCCQNYQSNENYQ	24	Puf4			Puf4		NA	NA
A.fumigatus.fa__Afu1g10440	A.fumigatus.fa	Afu1g10440	40		Puf6			Puf6		NA	N.crassa.fa__NCU09380T0	NA	Puf6	NA	NA	NA	Puf6		4	4	221;256;257;292;293;329;413;448		30;104;106;117;598;618;685;700	VRQ	KFG	SWD	SRC					VRQKFGSWDSRC	12						NA	NA
A.fumigatus.fa__Afu5g04340	A.fumigatus.fa	Afu5g04340	40		Puf8	Puf8		Puf8		NA	N.crassa.fa__NCU01760T0	NA	Puf8	NA	Puf8	Puf8	Puf8		8	8	411;446;447;482;483;518;519;554;559;594;595;630;631;666;675;710			SIQ	NFQ	CHQ	CHQ	SLQ	NWQ	SKE	NYQ	SIQNFQCHQCHQSLQNWQSKENYQ	24	Puf8			Puf8		NA	NA
N.fischeri.fa__NFIA_066150	N.fischeri.fa	NFIA_066150	41		Nop9			Nop9		S.cerevisiae.fa__YJL010C	N.crassa.fa__NCU06118T0	Nop9	Nop9	Nop9	Nop9	Nop9	Nop9		5	5	120;155;156;191;361;396;544;581;582;619		7;26;197;213;433;444;678;698	SRE	SHE	SRE	SRQ	SHD				SRESHESRESRQSHD	15						NA	NA
N.fischeri.fa__NFIA_082330	N.fischeri.fa	NFIA_082330	41		Puf1	Puf1 or Puf2		Puf1		S.cerevisiae.fa__YJR091C	N.crassa.fa__NCU06199T0	Puf1	Puf1	Puf1	Puf1	Puf1	Puf1		6	6	677;712;713;749;750;784;785;821;823;858;860;895	475;544	48;67;165;178;246;259;295;315;358;371;443;457;1069;1087;1170;1179	NTQ	TWQ	NYQ	ARR	ALT	YLL			NTQTWQNYQARRALTYLL	18		Puf1 or Puf2	Puf1 or 2 - has RRM	Puf1 or Puf2		NA	NA
N.fischeri.fa__NFIA_050840	N.fischeri.fa	NFIA_050840	41		Puf3	Puf3		Puf3		S.cerevisiae.fa__YLL013C	N.crassa.fa__NCU06511T0	Puf3	Puf3	Puf3	Puf3	Puf3	Puf3		8	8	491;526;527;562;563;598;599;634;635;670;671;706;707;742;750;785		54;70;125;139;822;841;852;865	SRQ	NYQ	CRQ	NHQ	CRQ	NYQ	SNE	NYQ	SRQNYQCRQNHQCRQNYQSNENYQ	24	Puf3			Puf3		SRQNYQCRQNHQCRQNYQSNENYQ	1
N.fischeri.fa__NFIA_022100	N.fischeri.fa	NFIA_022100	41		Puf4	Puf4		Puf4		S.cerevisiae.fa__YGL014W	N.crassa.fa__NCU11956T0	Puf4	Puf4	Puf4	Puf4	Puf4	Puf4		8	8	639;674;675;710;711;747;748;783;784;819;820;855;856;891;894;929		30;39;366;382;392;402;593;603;977;986	CRQ	NYQ	TRQ	NHQ	CCQ	NYQ	SNE	NYQ	CRQNYQTRQNHQCCQNYQSNENYQ	24	Puf4			Puf4		NA	NA
N.fischeri.fa__NFIA_015230	N.fischeri.fa	NFIA_015230	41		Puf6			Puf6		S.cerevisiae.fa__YDR496C	N.crassa.fa__NCU09380T0	Puf6	Puf6	Puf6	Puf6	Puf6	Puf6		4	4	186;221;222;257;258;294;378;413		29;92;98;114;566;574;649;666	VRQ	KFG	SWD	SRC					VRQKFGSWDSRC	12						NA	NA
N.fischeri.fa__NFIA_037730	N.fischeri.fa	NFIA_037730	41		Puf8	Puf8		Puf8		NA	N.crassa.fa__NCU01760T0	NA	Puf8	NA	Puf8	Puf8	Puf8		8	8	398;433;434;469;470;505;506;541;546;581;582;617;618;653;662;697			SIQ	NFQ	CHQ	CHQ	SLQ	NWQ	SKE	NYQ	SIQNFQCHQCHQSLQNWQSKENYQ	24	Puf8			Puf8		NA	NA
A.clavatus.fa__ACLA_039030	A.clavatus.fa	ACLA_039030	42		Nop9			Nop9		S.cerevisiae.fa__YJL010C	N.crassa.fa__NCU06118T0	Nop9	Nop9	Nop9	Nop9	Nop9	Nop9		5	5	114;149;150;187;355;390;538;575;576;613		10;28;192;202;489;500;672;691	SRE	SHE	SRE	SRQ	SHD				SRESHESRESRQSHD	15						NA	NA
A.clavatus.fa__ACLA_089090	A.clavatus.fa	ACLA_089090	42		Puf1	Puf1 or Puf2		Puf1		S.cerevisiae.fa__YJR091C	N.crassa.fa__NCU06199T0	Puf1	Puf1	Puf1	Puf1	Puf1	Puf1		6	6	682;717;718;753;755;789;790;826;828;863;865;900	480;549	48;66;163;178;185;202;246;259;296;316;359;372;1083;1095	NTQ	TWQ	NYQ	ARR	ALT	YLL			NTQTWQNYQARRALTYLL	18		Puf1 or Puf2	Puf1 or 2 - has RRM	Puf1 or Puf2		NA	NA
A.clavatus.fa__ACLA_096290	A.clavatus.fa	ACLA_096290	42		Puf3	Puf3		Puf3		S.cerevisiae.fa__YLL013C	N.crassa.fa__NCU06511T0	Puf3	Puf3	Puf3	Puf3	Puf3	Puf3		8	8	489;524;525;560;561;596;597;632;633;668;669;704;705;740;748;783		54;68;125;140;227;240;811;840;848;864;865;877	SRQ	NYQ	CRQ	NHQ	CRQ	NYQ	SNE	NYQ	SRQNYQCRQNHQCRQNYQSNENYQ	24	Puf3			Puf3		SRQNYQCRQNHQCRQNYQSNENYQ	1
A.clavatus.fa__ACLA_031910	A.clavatus.fa	ACLA_031910	42		Puf4	Puf4		Puf4		S.cerevisiae.fa__YGL014W	N.crassa.fa__NCU11956T0	Puf4	Puf4	Puf4	Puf4	Puf4	Puf4		8	8	585;620;621;656;657;693;694;729;730;765;766;801;802;837;840;875		17;26;314;331;538;551;923;932;959;979	CRQ	NYQ	TRQ	NHQ	CCQ	NYQ	SNE	NYQ	CRQNYQTRQNHQCCQNYQSNENYQ	24	Puf4			Puf4		NA	NA
A.clavatus.fa__ACLA_025090	A.clavatus.fa	ACLA_025090	42		Puf6			Puf6		S.cerevisiae.fa__YDR496C	N.crassa.fa__NCU09380T0	Puf6	Puf6	Puf6	Puf6	Puf6	Puf6		4	4	190;225;226;261;262;298;382;417		17;96;104;114;567;581;653;678	VRQ	KFG	SWD	SRC					VRQKFGSWDSRC	12						NA	NA
A.clavatus.fa__ACLA_000790	A.clavatus.fa	ACLA_000790	42		Puf8	Puf8		Puf8		NA	N.crassa.fa__NCU01760T0	NA	Puf8	NA	Puf8	Puf8	Puf8		8	8	398;433;434;469;470;505;506;541;546;581;582;617;618;653;662;697		169;180	SIQ	NFQ	CHQ	CHQ	SLQ	NWQ	SKE	NYQ	SIQNFQCHQCHQSLQNWQSKENYQ	24	Puf8			Puf8		NA	NA
A.niger.fa__fge1_pg_C_8000312.1	A.niger.fa	fge1_pg_C_8000312.1	43		Nop9			Nop9		S.cerevisiae.fa__YJL010C	N.crassa.fa__NCU06118T0	Nop9	Nop9	Nop9	Nop9	Nop9	Nop9		7	7	114;149;150;186;214;249;353;388;390;425;557;593;595;632		57;71;191;201;492;505;688;705	SRE	SHE	SHR	SRE	GYL	SHQ	SRD		SRESHESHRSREGYLSHQSRD	21						NA	NA
A.niger.fa__est_GWPlus_C_22468.1	A.niger.fa	est_GWPlus_C_22468.1	43		Puf1	Puf1 or Puf2		Puf1		S.cerevisiae.fa__YJR091C	N.crassa.fa__NCU06199T0	Puf1	Puf1	Puf1	Puf1	Puf1	Puf1		6	6	680;715;716;752;753;787;788;824;826;861;863;898	481;550	165;178;194;208;246;259;364;377;1058;1077;1080;1098;1101;1115	NTQ	TWQ	NYQ	ARR	ALT	YLL			NTQTWQNYQARRALTYLL	18		Puf1 or Puf2	Puf1 or 2 - has RRM	Puf1 or Puf2		NA	NA
A.niger.fa__est_fge1_pm_C_10386.1	A.niger.fa	est_fge1_pm_C_10386.1	43		Puf4	Puf4		Puf4		S.cerevisiae.fa__YGL014W	N.crassa.fa__NCU11956T0	Puf4	Puf4	Puf4	Puf4	Puf4	Puf4		8	8	589;624;625;660;661;697;698;733;734;769;770;805;806;841;844;879		15;29;315;332;371;386;540;554;1271;1291;1312;1322;1369;1389;1451;1468	CRQ	NYQ	TRQ	NHQ	CCQ	NYQ	SNE	NYQ	CRQNYQTRQNHQCCQNYQSNENYQ	24	Puf4			Puf4		NA	NA
A.niger.fa__e_gw1_3.2058.1	A.niger.fa	e_gw1_3.2058.1	43		Puf6			Puf6		S.cerevisiae.fa__YDR496C	N.crassa.fa__NCU09380T0	Puf6	Puf6	Puf6	Puf6	Puf6	Puf6		4	4	57;92;93;128;129;165;252;287		439;452;523;542	VRQ	KFG	SWD	ARS					VRQKFGSWDARS	12						NA	NA
A.niger.fa__e_gw1_11.955.1	A.niger.fa	e_gw1_11.955.1	43		Puf8	Puf8		Puf8		NA	N.crassa.fa__NCU01760T0	NA	Puf8	NA	Puf8	Puf8	Puf8		8	8	288;323;324;359;360;395;396;431;436;471;472;507;508;543;552;587		79;93;190;209	SIQ	NFQ	CHQ	CHQ	SLQ	NWQ	SKE	NYQ	SIQNFQCHQCHQSLQNWQSKENYQ	24	Puf8			Puf8		NA	NA
A.terreus.fa__ATET_04644	A.terreus.fa	ATET_04644	44		Nop9			Nop9		S.cerevisiae.fa__YJL010C	NA	Nop9	NA	NA	NA	NA	Nop9		7	7	710;745;746;781;813;848;953;988;990;1025;1136;1173;1174;1211		42;51;642;658;792;800;1269;1288	SRE	SHE	SHR	SRE	GYL	TRQ	SRD		SRESHESHRSREGYLTRQSRD	21						NA	NA
A.terreus.fa__ATET_06748	A.terreus.fa	ATET_06748	44		Puf1	Puf1 or Puf2		Puf1		S.cerevisiae.fa__YJR091C	N.crassa.fa__NCU06199T0	Puf1	Puf1	Puf1	Puf1	Puf1	Puf1		6	6	681;716;717;753;754;788;789;825;827;862;864;899	482;551	26;38;163;177;185;208;213;230;246;259;366;383;1081;1094;1096;1115;1125;1139;1161;1179	NTQ	TWQ	NYQ	ARR	ALT	YLL			NTQTWQNYQARRALTYLL	18		Puf1 or Puf2	Puf1 or 2 - has RRM	Puf1 or Puf2		NA	NA
A.terreus.fa__ATET_07024	A.terreus.fa	ATET_07024	44		Puf3	Puf3		Puf3		S.cerevisiae.fa__YLL013C	N.crassa.fa__NCU06511T0	Puf3	Puf3	Puf3	Puf3	Puf3	Puf3		8	8	486;521;522;557;558;593;594;629;630;665;666;701;702;737;762;797		67;81;164;183;430;444	SRQ	NYQ	CRQ	NHQ	CRQ	NYQ	SNE	NYQ	SRQNYQCRQNHQCRQNYQSNENYQ	24	Puf3			Puf3		SRQNYQCRQNHQCRQNYQSNENYQ	1
A.terreus.fa__ATET_04843	A.terreus.fa	ATET_04843	44		Puf4	Puf4		Puf4		S.cerevisiae.fa__YGL014W	N.crassa.fa__NCU11956T0	Puf4	Puf4	Puf4	Puf4	Puf4	Puf4		8	8	604;639;640;675;676;712;713;748;749;784;785;820;821;856;859;894		15;29;337;354;363;374;517;532;557;571	CRQ	NYQ	TRQ	NHQ	CCQ	NYQ	SNE	NYQ	CRQNYQTRQNHQCCQNYQSNENYQ	24	Puf4			Puf4		NA	NA
A.terreus.fa__ATET_00235	A.terreus.fa	ATET_00235	44		Puf6			Puf6		S.cerevisiae.fa__YDR496C	N.crassa.fa__NCU09380T0	Puf6	Puf6	Puf6	Puf6	Puf6	Puf6		4	4	188;223;224;259;260;296;383;418		19;86;568;583;654;676	VRQ	KFG	SWD	SRC					VRQKFGSWDSRC	12						NA	NA
A.terreus.fa__ATET_07977	A.terreus.fa	ATET_07977	44		Puf8	Puf8		Puf8		NA	N.crassa.fa__NCU01760T0	NA	Puf8	NA	Puf8	Puf8	Puf8		7	7	391;426;427;462;463;498;499;534;539;574;575;610;611;646		157;175	SIQ	NFQ	CHQ	CHQ	SLQ	NWQ	SKE		SIQNFQCHQCHQSLQNWQSKE	21		Puf8 - missing rep8		Puf8		NA	NA
A.flavus.fa__AFL2T_02342	A.flavus.fa	AFL2T_02342	45		Nop9			Nop9		S.cerevisiae.fa__YJL010C	N.crassa.fa__NCU06118T0	Nop9	Nop9	Nop9	Nop9	Nop9	Nop9		6	6	122;157;158;193;365;400;402;437;552;588;590;627		7;27;57;71;255;266;683;703	SRE	SHE	SRE	GYL	SRQ	SHD			SRESHESREGYLSRQSHD	18						NA	NA
A.flavus.fa__AFL2T_09308	A.flavus.fa	AFL2T_09308	45		Puf1	Puf1 or Puf2		Puf1		S.cerevisiae.fa__YJR091C	N.crassa.fa__NCU06199T0	Puf1	Puf1	Puf1	Puf1	Puf1	Puf1		6	6	679;714;715;751;752;786;787;823;825;860;862;897	478;547	164;177;184;194;214;227;245;258;296;307;362;375;593;604;1072;1088;1159;1185	NTQ	TWQ	NYQ	ARR	ALT	YLL			NTQTWQNYQARRALTYLL	18		Puf1 or Puf2	Puf1 or 2 - has RRM	Puf1 or Puf2		NA	NA
A.flavus.fa__AFL2T_05767	A.flavus.fa	AFL2T_05767	45		Puf3	Puf3		Puf3		S.cerevisiae.fa__YLL013C	N.crassa.fa__NCU06511T0	Puf3	Puf3	Puf3	Puf3	Puf3	Puf3		8	8	195;230;231;266;267;302;303;338;339;374;375;410;411;446;454;489		94;120;520;541;556;568	SRQ	NYQ	CRQ	NHQ	CRQ	NYQ	SNE	NYQ	SRQNYQCRQNHQCRQNYQSNENYQ	24	Puf3			Puf3		SRQNYQCRQNHQCRQNYQSNENYQ	1
A.flavus.fa__AFL2T_00826	A.flavus.fa	AFL2T_00826	45		Puf4	Puf4		Puf4		S.cerevisiae.fa__YGL014W	N.crassa.fa__NCU11956T0	Puf4	Puf4	Puf4	Puf4	Puf4	Puf4		8	8	505;540;541;576;577;613;614;649;650;685;686;721;722;757;760;795		233;250;260;270;414;426	CRQ	NYQ	TRQ	NHQ	CCQ	NYQ	SNE	NYQ	CRQNYQTRQNHQCCQNYQSNENYQ	24	Puf4			Puf4		NA	NA
A.flavus.fa__AFL2T_07724	A.flavus.fa	AFL2T_07724	45		Puf6			Puf6		S.cerevisiae.fa__YDR496C	N.crassa.fa__NCU09380T0	Puf6	Puf6	Puf6	Puf6	Puf6	Puf6		4	4	187;222;223;258;259;295;382;417		19;62;63;115;651;675	VRQ	KFG	SWD	SRC					VRQKFGSWDSRC	12						NA	NA
A.flavus.fa__AFL2T_10014	A.flavus.fa	AFL2T_10014	45		Puf8	Puf8		Puf8		NA	N.crassa.fa__NCU01760T0	NA	Puf8	NA	Puf8	Puf8	Puf8		8	8	399;434;435;470;471;506;507;542;547;582;583;618;619;654;663;698		352;377	SIQ	NFQ	CHQ	CHQ	SLQ	NWQ	SKE	NYQ	SIQNFQCHQCHQSLQNWQSKENYQ	24	Puf8			Puf8		NA	NA
A.oryzae.fa__AO090003000665	A.oryzae.fa	AO090003000665	46		Nop9			Nop9		S.cerevisiae.fa__YJL010C	N.crassa.fa__NCU06118T0	Nop9	Nop9	Nop9	Nop9	Nop9	Nop9		6	6	122;157;158;193;365;400;402;437;552;588;590;627		7;27;57;71;255;266;683;703	SRE	SHE	SRE	GYL	SRQ	SHD			SRESHESREGYLSRQSHD	18						NA	NA
A.oryzae.fa__AO090001000672	A.oryzae.fa	AO090001000672	46		Puf1	Puf1 or Puf2		Puf1		S.cerevisiae.fa__YJR091C	N.crassa.fa__NCU06199T0	Puf1	Puf1	Puf1	Puf1	Puf1	Puf1		6	6	679;714;715;751;752;786;787;823;825;860;862;897	478;547	164;177;184;194;214;227;245;258;296;307;362;375;593;604;1072;1088;1159;1188	NTQ	TWQ	NYQ	ARR	ALT	YLL			NTQTWQNYQARRALTYLL	18		Puf1 or Puf2	Puf1 or 2 - has RRM	Puf1 or Puf2		NA	NA
A.oryzae.fa__AO090701000120	A.oryzae.fa	AO090701000120	46		Puf3	Puf3		Puf3		S.cerevisiae.fa__YLL013C	N.crassa.fa__NCU06511T0	Puf3	Puf3	Puf3	Puf3	Puf3	Puf3		8	8	445;480;481;516;517;552;553;588;589;624;625;660;661;696;704;739		48;57;344;370;770;791;806;818	SRQ	NYQ	CRQ	NHQ	CRQ	NYQ	SNE	NYQ	SRQNYQCRQNHQCRQNYQSNENYQ	24	Puf3			Puf3		SRQNYQCRQNHQCRQNYQSNENYQ	1
A.oryzae.fa__AO090005000845	A.oryzae.fa	AO090005000845	46		Puf4	Puf4		Puf4		S.cerevisiae.fa__YGL014W	N.crassa.fa__NCU11956T0	Puf4	Puf4	Puf4	Puf4	Puf4	Puf4		8	8	235;270;271;306;307;343;344;379;380;415;416;451;452;487;490;525		144;156	CRQ	NYQ	TRQ	NHQ	CCQ	NYQ	SNE	NYQ	CRQNYQTRQNHQCCQNYQSNENYQ	24	Puf4			Puf4		NA	NA
A.oryzae.fa__AO090038000383	A.oryzae.fa	AO090038000383	46		Puf6			Puf6		S.cerevisiae.fa__YDR496C	N.crassa.fa__NCU09380T0	Puf6	Puf6	Puf6	Puf6	Puf6	Puf6		4	4	187;222;223;258;259;295;382;417		19;62;63;115;651;675	VRQ	KFG	SWD	SRC					VRQKFGSWDSRC	12						NA	NA
A.oryzae.fa__AO090102000642	A.oryzae.fa	AO090102000642	46		Puf8	Puf8		Puf8		NA	N.crassa.fa__NCU01760T0	NA	Puf8	NA	Puf8	Puf8	Puf8		8	8	375;410;411;446;447;482;483;518;523;558;559;594;595;630;639;674			SIQ	NFQ	CHQ	CHQ	SLQ	NWQ	SKE	NYQ	SIQNFQCHQCHQSLQNWQSKENYQ	24	Puf8			Puf8		NA	NA
M.fijiensis.fa__33582	M.fijiensis.fa	33582	47		Nop9			Nop9		S.cerevisiae.fa__YJL010C	N.crassa.fa__NCU06118T0	Nop9	Nop9	Nop9	Nop9	Nop9	Nop9		6	6	106;141;142;176;343;378;380;418;516;553;554;591		675;686;688;706;707;719	SRE	SHE	SHE	THC	TRQ	SHD			SRESHESHETHCTRQSHD	18						NA	NA
M.fijiensis.fa__114365	M.fijiensis.fa	114365	47		Puf1	Puf1 or Puf2		Puf1		S.cerevisiae.fa__YJR091C	N.crassa.fa__NCU06199T0	Puf1	Puf1	Puf1	Puf1	Puf1	Puf1		6	6	664;699;700;736;737;771;772;808;810;845;847;883	456;525	191;202;325;340;350;357	NTQ	TWQ	NYQ	ARR	ALT	YLL			NTQTWQNYQARRALTYLL	18		Puf1 or Puf2	Puf1 or 2 - has RRM	Puf1 or Puf2		NA	NA
M.fijiensis.fa__161146	M.fijiensis.fa	161146	47	possibly missing N-terminus, Puf domain truncated	Puf3			Puf3		S.cerevisiae.fa__YLL013C	N.crassa.fa__NCU06511T0	Puf3	Puf3	Puf3	Puf3	Puf3	Puf3		6	6	1;35;36;71;72;107;108;143;144;179;190;225			RVK	NHQ	CRQ	NYQ	SNE	NYQ			RVKNHQCRQNYQSNENYQ	18						------CRQNHQCRQNYQSNENYQ	0
M.fijiensis.fa__150818	M.fijiensis.fa	150818	47	possibly missing N-terminus, Puf domain intact	Puf4	Puf4		Puf4		S.cerevisiae.fa__YGL014W	N.crassa.fa__NCU11956T0	Puf4	Puf4	Puf4	Puf4	Puf4	Puf4		8	8	85;120;121;156;157;193;194;229;230;265;266;301;302;337;340;375		31;51;60;76	CRQ	NYQ	TRQ	NHQ	CCQ	NYQ	SNE	NYQ	CRQNYQTRQNHQCCQNYQSNENYQ	24	Puf4			Puf4		NA	NA
M.fijiensis.fa__107613	M.fijiensis.fa	107613	47		Puf6			Puf6		S.cerevisiae.fa__YDR496C	N.crassa.fa__NCU09380T0	Puf6	Puf6	Puf6	Puf6	Puf6	Puf6		5	5	102;137;138;173;174;210;309;344;345;382		582;601	VRQ	KFA	SWD	AHC	KIV				VRQKFASWDAHCKIV	15						NA	NA
M.fijiensis.fa__151195	M.fijiensis.fa	151195	47	possibly missing N-terminus, Puf domain intact	Puf8	Puf8		Puf8		NA	N.crassa.fa__NCU01760T0	NA	Puf8	NA	Puf8	Puf8	Puf8		8	8	74;109;110;145;146;181;182;220;222;257;258;293;294;329;338;372		2;22;417;428	SIQ	NFQ	CHQ	CHQ	SLQ	NWQ	SKE	NYQ	SIQNFQCHQCHQSLQNWQSKENYQ	24	Puf8			Puf8		NA	NA
M.graminicola.fa__111327	M.graminicola.fa	111327	48		Nop9			Nop9		S.cerevisiae.fa__YJL010C	NA	Nop9	NA	NA	NA	NA	Nop9		5	0	104;139;140;175;202;238;342;377;570;607		304;314;415;424;672;692;813;826	SRE	SHE	SHR	AHE	SHD				SRESHESHRAHESHD	15						NA	NA
M.graminicola.fa__85217	M.graminicola.fa	85217	48		Puf1	Puf1 or Puf2		Puf1		S.cerevisiae.fa__YJR091C	N.crassa.fa__NCU06199T0	Puf1	Puf1	Puf1	Puf1	Puf1	Puf1		5	5	658;693;694;730;731;765;766;802;841;877	448;517	162;178;185;205;339;351;548;579;1039;1051;1078;1099;1103;1113	NTQ	TWQ	NYQ	ARR	YLL				NTQTWQNYQARRYLL	15		Puf1 or Puf2	Puf1 or 2 - has RRM	Puf1 or Puf2		NA	NA
M.graminicola.fa__37332	M.graminicola.fa	37332	48	possibly missing both N and C-terminus, Puf domain truncated	Puf3	Puf3		Puf3		S.cerevisiae.fa__YLL013C	N.crassa.fa__NCU06511T0	Puf3	Puf3	Puf3	Puf3	Puf3	Puf3		6	6	36;71;72;107;108;143;144;179;180;215;216;251			SRQ	NYQ	CRQ	NHQ	CRQ	NYQ			SRQNYQCRQNHQCRQNYQ	18		Puf3 - missing rep7-8		Puf3		SRQNYQCRQNHQCRQNYQSNE---	0
M.graminicola.fa__14505	M.graminicola.fa	14505	48	possibly missing N-terminus, Puf domain intact	Puf4	Puf4		Puf4		S.cerevisiae.fa__YGL014W	N.crassa.fa__NCU11956T0	Puf4	Puf4	Puf4	Puf4	Puf4	Puf4		8	8	19;54;55;90;91;127;128;163;164;199;200;235;236;271;274;309			CRQ	NYQ	TRQ	NHQ	CCQ	NYQ	SNE	NYQ	CRQNYQTRQNHQCCQNYQSNENYQ	24	Puf4			Puf4		NA	NA
M.graminicola.fa__98854	M.graminicola.fa	98854	48		Puf6			Puf6		S.cerevisiae.fa__YDR496C	N.crassa.fa__NCU09380T0	Puf6	Puf6	Puf6	Puf6	Puf6	Puf6		5	5	157;192;193;228;229;264;371;406;407;444		53;66;633;655;671;695	VRQ	KFA	SWD	SRC	KMV				VRQKFASWDSRCKMV	15						NA	NA
M.graminicola.fa__37042	M.graminicola.fa	37042	48	possibly missing N-terminus, Puf domain intact	Puf8	Puf8		Puf8		NA	N.crassa.fa__NCU01760T0	NA	Puf8	NA	Puf8	Puf8	Puf8		7	7	94;129;130;165;166;204;206;241;242;277;278;313;322;356		419;430	NFQ	CHQ	CHQ	SLQ	NWQ	SKE	NYQ		NFQCHQCHQSLQNWQSKENYQ	21		Puf8 - missing rep1		Puf8		NA	NA
S.nodorum.fa__SNOT_14567	S.nodorum.fa	SNOT_14567	49		Nop9			Nop9		S.cerevisiae.fa__YJL010C	N.crassa.fa__NCU06118T0	Nop9	Nop9	Nop9	Nop9	Nop9	Nop9		5	5	103;138;139;174;203;238;343;378;520;557		3;19;681;694;698;707	SRE	SHE	SHR	SRE	SRQ				SRESHESHRSRESRQ	15						NA	NA
S.nodorum.fa__SNOT_13737	S.nodorum.fa	SNOT_13737	49		Puf1	Puf1 or Puf2		Puf1		S.cerevisiae.fa__YJR091C	N.crassa.fa__NCU06199T0	Puf1	Puf1	Puf1	Puf1	Puf1	Puf1		6	6	657;692;693;729;730;763;764;800;802;837;839;875	448;517	52;69;155;166;171;187;198;210;967;980;1000;1032;1071;1106	NTQ	TWQ	NYQ	ARR	ALT	YLL			NTQTWQNYQARRALTYLL	18		Puf1 or Puf2	Puf1 or 2 - has RRM	Puf1 or Puf2		NA	NA
S.nodorum.fa__SNOT_01515	S.nodorum.fa	SNOT_01515	49		Puf3	Puf3		Puf3		S.cerevisiae.fa__YLL013C	N.crassa.fa__NCU06511T0	Puf3	Puf3	Puf3	Puf3	Puf3	Puf3		8	8	522;557;558;593;594;629;630;665;666;701;702;737;738;773;781;816		33;40;434;441;491;502	SRQ	NYQ	CRQ	NHQ	CRQ	NYQ	SNE	NYQ	SRQNYQCRQNHQCRQNYQSNENYQ	24	Puf3			Puf3		SRQNYQCRQNHQCRQNYQSNENYQ	1
S.nodorum.fa__SNOT_01219	S.nodorum.fa	SNOT_01219	49		Puf4	Puf4		Puf4		S.cerevisiae.fa__YGL014W	N.crassa.fa__NCU11956T0	Puf4	Puf4	Puf4	Puf4	Puf4	Puf4		8	8	649;684;685;720;721;757;758;793;794;829;830;865;866;901;904;939		108;120;254;264;353;365;464;478;555;569;582;616	CRQ	NYQ	TRQ	NHQ	CCQ	NYQ	SNE	NYQ	CRQNYQTRQNHQCCQNYQSNENYQ	24	Puf4			Puf4		NA	NA
S.nodorum.fa__SNOT_06976	S.nodorum.fa	SNOT_06976	49		Puf6			Puf6		S.cerevisiae.fa__YDR496C	N.crassa.fa__NCU09380T0	Puf6	Puf6	Puf6	Puf6	Puf6	Puf6		5	5	186;221;222;257;258;294;390;425;426;463		11;35;42;64;615;626;663;702	VRQ	KFA	AWD	SRS	HHL				VRQKFAAWDSRSHHL	15						NA	NA
S.nodorum.fa__SNOT_01615	S.nodorum.fa	SNOT_01615	49		Puf8	Puf8		Puf8		NA	N.crassa.fa__NCU01760T0	NA	Puf8	NA	Puf8	Puf8	Puf8		8	8	399;434;435;470;471;506;507;545;547;582;583;618;619;654;663;698		276;308	SIQ	NFQ	CHQ	CHQ	SLQ	NWQ	SKE	NYQ	SIQNFQCHQCHQSLQNWQSKENYQ	24	Puf8			Puf8		NA	NA
P.tritici-repentis.fa__PTRT_06436	P.tritici-repentis.fa	PTRT_06436	50		Nop9			Nop9		S.cerevisiae.fa__YJL010C	N.crassa.fa__NCU06118T0	Nop9	Nop9	Nop9	Nop9	Nop9	Nop9		0	0			293;307;662;682										0						NA	NA
P.tritici-repentis.fa__PTRT_10794	P.tritici-repentis.fa	PTRT_10794	50		Puf1	Puf1 or Puf2		Puf1		S.cerevisiae.fa__YJR091C	N.crassa.fa__NCU06199T0	Puf1	Puf1	Puf1	Puf1	Puf1	Puf1		6	6	654;689;690;726;727;760;761;797;799;834;836;872	448;517	46;68;163;180;199;211;305;319;1000;1034;1076;1107	NTQ	TWQ	NYQ	ARR	ALT	YLL			NTQTWQNYQARRALTYLL	18		Puf1 or Puf2	Puf1 or 2 - has RRM	Puf1 or Puf2		NA	NA
P.tritici-repentis.fa__PTRT_03780	P.tritici-repentis.fa	PTRT_03780	50		Puf3	Puf3		Puf3		S.cerevisiae.fa__YLL013C	N.crassa.fa__NCU06511T0	Puf3	Puf3	Puf3	Puf3	Puf3	Puf3		8	8	511;546;547;582;583;618;619;654;655;690;691;726;727;762;770;805		207;223;418;434;456;475;842;861	SRQ	NYQ	CRQ	NHQ	CRQ	NYQ	SNE	NYQ	SRQNYQCRQNHQCRQNYQSNENYQ	24	Puf3			Puf3		SRQNYQCRQNHQCRQNYQSNENYQ	1
P.tritici-repentis.fa__PTRT_03592	P.tritici-repentis.fa	PTRT_03592	50		Puf4	Puf4		Puf4		S.cerevisiae.fa__YGL014W	N.crassa.fa__NCU11956T0	Puf4	Puf4	Puf4	Puf4	Puf4	Puf4		8	8	591;626;627;662;663;699;700;735;736;771;772;807;808;843;846;881		195;206;293;305;428;447;524;543;975;987	CRQ	NYQ	TRQ	NHQ	CCQ	NYQ	SNE	NYQ	CRQNYQTRQNHQCCQNYQSNENYQ	24	Puf4			Puf4		NA	NA
P.tritici-repentis.fa__PTRT_00724	P.tritici-repentis.fa	PTRT_00724	50		Puf6			Puf6		S.cerevisiae.fa__YDR496C	N.crassa.fa__NCU09380T0	Puf6	Puf6	Puf6	Puf6	Puf6	Puf6		5	5	128;163;164;199;200;236;332;367;368;405		17;31;39;52;618;633;638;656	VRQ	KFA	AWD	SRS	HHL				VRQKFAAWDSRSHHL	15						NA	NA
P.tritici-repentis.fa__PTRT_03495	P.tritici-repentis.fa	PTRT_03495	50		Puf8	Puf8		Puf8		NA	N.crassa.fa__NCU01760T0	NA	Puf8	NA	Puf8	Puf8	Puf8		8	8	405;440;441;476;477;512;513;551;553;588;589;624;625;660;669;704		248;261	SIQ	NFQ	CHQ	CHQ	SLQ	NWQ	SKE	NYQ	SIQNFQCHQCHQSLQNWQSKENYQ	24	Puf8			Puf8		NA	NA
B.cinerea.fa__BC1T_06925	B.cinerea.fa	BC1T_06925	51		Nop9			Nop9		S.cerevisiae.fa__YJL010C	N.crassa.fa__NCU06118T0	Nop9	Nop9	Nop9	Nop9	Nop9	Nop9		5	5	118;153;154;189;230;265;372;407;409;444		333;341;505;528;583;596;633;654;732;752	SRE	SHE	SHR	SRE	SYI				SRESHESHRSRESYI	15						NA	NA
B.cinerea.fa__BC1T_15545	B.cinerea.fa	BC1T_15545	51		Puf1	Puf1 or Puf2		Puf1		S.cerevisiae.fa__YJR091C	N.crassa.fa__NCU06199T0	Puf1	Puf1	Puf1	Puf1	Puf1	Puf1		6	6	662;697;698;734;735;769;770;806;808;843;845;881	454;523	157;168;169;181;314;327;336;354;358;368;923;934;995;1010;1039;1064;1101;1114	NTQ	TWQ	NYQ	ARR	ALT	YLL			NTQTWQNYQARRALTYLL	18		Puf1 or Puf2	Puf1 or 2 - has RRM	Puf1 or Puf2		NA	NA
B.cinerea.fa__BC1T_11734	B.cinerea.fa	BC1T_11734	51		Puf3	Puf3		Puf3		S.cerevisiae.fa__YLL013C	N.crassa.fa__NCU06511T0	Puf3	Puf3	Puf3	Puf3	Puf3	Puf3		8	8	559;594;595;630;631;666;667;702;703;738;739;774;775;810;818;853		1;15;105;121;137;153;271;289;508;519	SRQ	NYQ	CRQ	NHQ	CRQ	NYQ	SNE	NYQ	SRQNYQCRQNHQCRQNYQSNENYQ	24	Puf3			Puf3		SRQNYQCRQNHQCRQNYQSNENYQ	1
B.cinerea.fa__BC1T_04124	B.cinerea.fa	BC1T_04124	51		Puf4	Puf4		Puf4		S.cerevisiae.fa__YGL014W	N.crassa.fa__NCU11956T0	Puf4	Puf4	Puf4	Puf4	Puf4	Puf4		8	8	666;701;702;737;738;774;775;810;811;846;847;882;883;918;921;956		373;390;489;502;547;558;601;615;1071;1084	CRQ	NYQ	TRQ	NHQ	CCQ	NYQ	SNE	NYQ	CRQNYQTRQNHQCCQNYQSNENYQ	24	Puf4			Puf4		NA	NA
B.cinerea.fa__BC1T_04006	B.cinerea.fa	BC1T_04006	51		Puf6			Puf6		S.cerevisiae.fa__YDR496C	N.crassa.fa__NCU09380T0	Puf6	Puf6	Puf6	Puf6	Puf6	Puf6		0	0			30;81;542;550										0						NA	NA
B.cinerea.fa__BC1T_02637	B.cinerea.fa	BC1T_02637	51		Puf8	Puf8		Puf8		NA	N.crassa.fa__NCU01760T0	NA	Puf8	NA	Puf8	Puf8	Puf8		8	8	454;489;490;525;526;561;562;597;602;637;638;673;674;709;718;753		66;73;243;255;348;367;382;392	SIQ	NFQ	CHQ	CHQ	SLQ	NWQ	SKE	NYQ	SIQNFQCHQCHQSLQNWQSKENYQ	24	Puf8			Puf8		NA	NA
S.sclerotiorum.fa__SS1T_11737	S.sclerotiorum.fa	SS1T_11737	52				?	?		NA	NA	NA	NA	NA	NA	NA			0	0													0						NA	NA
S.sclerotiorum.fa__SS1T_11736	S.sclerotiorum.fa	SS1T_11736	52		Nop9			Nop9		S.cerevisiae.fa__YJL010C	N.crassa.fa__NCU06118T0	Nop9	Nop9	Nop9	Nop9	Nop9	Nop9		5	5	117;152;153;188;227;262;369;404;406;441		15;32;330;338;502;511	SRE	SHE	SHR	SRE	SYI				SRESHESHRSRESYI	15						NA	NA
S.sclerotiorum.fa__SS1T_13666	S.sclerotiorum.fa	SS1T_13666	52		Puf1	Puf1 or Puf2		Puf1		S.cerevisiae.fa__YJR091C	N.crassa.fa__NCU06199T0	Puf1	Puf1	Puf1	Puf1	Puf1	Puf1		6	6	658;693;694;730;731;765;766;802;804;839;841;877	450;519	169;184;242;261;314;327;337;352;990;1008;1094;1108;1114;1133	NTQ	TWQ	NYQ	ARR	ALT	YLL			NTQTWQNYQARRALTYLL	18		Puf1 or Puf2	Puf1 or 2 - has RRM	Puf1 or Puf2		NA	NA
S.sclerotiorum.fa__SS1T_00079	S.sclerotiorum.fa	SS1T_00079	52		Puf3	Puf3		Puf3		S.cerevisiae.fa__YLL013C	N.crassa.fa__NCU06511T0	Puf3	Puf3	Puf3	Puf3	Puf3	Puf3		8	8	559;594;595;630;631;666;667;702;703;738;739;774;775;810;818;853		105;121;138;154;216;227;362;373;507;519	SRQ	NYQ	CRQ	NHQ	CRQ	NYQ	SNE	NYQ	SRQNYQCRQNHQCRQNYQSNENYQ	24	Puf3			Puf3		SRQNYQCRQNHQCRQNYQSNENYQ	1
S.sclerotiorum.fa__SS1T_03751	S.sclerotiorum.fa	SS1T_03751	52		Puf4	Puf4		Puf4		S.cerevisiae.fa__YGL014W	N.crassa.fa__NCU11956T0	Puf4	Puf4	Puf4	Puf4	Puf4	Puf4		8	8	663;698;699;734;735;771;772;807;808;843;844;879;880;915;918;953		263;273;366;383;541;552;612;628;1068;1081	CRQ	NYQ	TRQ	NHQ	CCQ	NYQ	SNE	NYQ	CRQNYQTRQNHQCCQNYQSNENYQ	24	Puf4			Puf4		NA	NA
S.sclerotiorum.fa__SS1T_06776	S.sclerotiorum.fa	SS1T_06776	52		Puf6			Puf6		S.cerevisiae.fa__YDR496C	N.crassa.fa__NCU09380T0	Puf6	Puf6	Puf6	Puf6	Puf6	Puf6		0	0			35;81;541;550										0						NA	NA
S.sclerotiorum.fa__SS1T_01761	S.sclerotiorum.fa	SS1T_01761	52		Puf8	Puf8		Puf8		NA	N.crassa.fa__NCU01760T0	NA	Puf8	NA	Puf8	Puf8	Puf8		8	8	452;487;488;523;524;559;560;595;600;635;636;671;672;707;716;751		67;75;242;254;345;366;782;796	SIQ	NFQ	CHQ	CHQ	SLQ	NWQ	SKE	NYQ	SIQNFQCHQCHQSLQNWQSKENYQ	24	Puf8			Puf8		NA	NA
C.globosum.fa__CHGT_09707	C.globosum.fa	CHGT_09707	53		Nop9			Nop9		S.cerevisiae.fa__YJL010C	N.crassa.fa__NCU06118T0	Nop9	Nop9	Nop9	Nop9	Nop9	Nop9		0	0			13;33;199;210;214;231;348;381;539;550;585;597;705;727										0						NA	NA
C.globosum.fa__CHGT_03262	C.globosum.fa	CHGT_03262	53		Puf1	Puf1 or Puf2		Puf1		S.cerevisiae.fa__YJR091C	N.crassa.fa__NCU06199T0	Puf1	Puf1	Puf1	Puf1	Puf1	Puf1		6	6	665;700;701;736;738;772;773;809;811;846;848;884	456;525	57;71;93;106;323;337;953;965;982;1019;1122;1177	NTQ	TWQ	NYQ	ARR	ALT	YLL			NTQTWQNYQARRALTYLL	18		Puf1 or Puf2	Puf1 or 2 - has RRM	Puf1 or Puf2		NA	NA
C.globosum.fa__CHGT_03277	C.globosum.fa	CHGT_03277	53		Puf3	Puf3		Puf3		S.cerevisiae.fa__YLL013C	N.crassa.fa__NCU06511T0	Puf3	Puf3	Puf3	Puf3	Puf3	Puf3		7	7	436;471;472;507;508;543;544;579;580;615;616;651;652;687		363;376;784;796	SRQ	NYQ	CRQ	NHQ	CRQ	NYQ	SNE		SRQNYQCRQNHQCRQNYQSNE	21		Puf3 - missing rep8		Puf3		SRQNYQCRQNHQCRQNYQSNEDDK	0
C.globosum.fa__CHGT_07853	C.globosum.fa	CHGT_07853	53		Puf4	Puf4		Puf4		S.cerevisiae.fa__YGL014W	N.crassa.fa__NCU11956T0	Puf4	Puf4	Puf4	Puf4	Puf4	Puf4		8	8	596;631;632;667;668;704;705;740;741;776;777;812;813;848;851;886		160;178;285;291;417;431;491;504;953;964	CRQ	NYQ	TRQ	NHQ	CCQ	NYQ	SNE	NYQ	CRQNYQTRQNHQCCQNYQSNENYQ	24	Puf4			Puf4		NA	NA
C.globosum.fa__CHGT_02739	C.globosum.fa	CHGT_02739	53		Puf6			Puf6		S.cerevisiae.fa__YDR496C	N.crassa.fa__NCU09380T0	Puf6	Puf6	Puf6	Puf6	Puf6	Puf6		0	0			2;21;28;38;50;64;535;545										0						NA	NA
C.globosum.fa__CHGT_10227	C.globosum.fa	CHGT_10227	53		Puf8	Puf8		Puf8		NA	N.crassa.fa__NCU01760T0	NA	Puf8	NA	Puf8	Puf8	Puf8		8	8	422;457;458;493;494;529;530;565;570;605;606;641;642;677;686;721		118;132;318;330	SIQ	NFQ	CHQ	CHQ	SLQ	NWQ	SKE	NYQ	SIQNFQCHQCHQSLQNWQSKENYQ	24	Puf8			Puf8		NA	NA
P.anserina.fa__Pans_DSM_980:PODANSg1703.t1	P.anserina.fa	Pans_DSM_980:PODANSg1703.t1	54		Nop9			Nop9		S.cerevisiae.fa__YJL010C	N.crassa.fa__NCU06118T0	Nop9	Nop9	Nop9	Nop9	Nop9	Nop9		0	0			87;99;213;234;241;253;267;280;366;386;508;522;538;550										0						NA	NA
P.anserina.fa__Pans_DSM_980:PODANSg5234.t1	P.anserina.fa	Pans_DSM_980:PODANSg5234.t1	54		Puf1	Puf1 or Puf2		Puf1		S.cerevisiae.fa__YJR091C	N.crassa.fa__NCU06199T0	Puf1	Puf1	Puf1	Puf1	Puf1	Puf1		6	6	621;656;657;693;694;728;729;765;767;802;804;840		25;34;326;338;374;385;940;972;1080;1092;1118;1129	NTQ	TWQ	NYQ	ARR	ALT	YLL			NTQTWQNYQARRALTYLL	18		Puf1 or Puf2		Puf1 or Puf2		NA	NA
P.anserina.fa__Pans_DSM_980:PODANSg5222.t1	P.anserina.fa	Pans_DSM_980:PODANSg5222.t1	54		Puf3	Puf3		Puf3		S.cerevisiae.fa__YLL013C	N.crassa.fa__NCU06511T0	Puf3	Puf3	Puf3	Puf3	Puf3	Puf3		8	8	356;391;392;427;428;463;464;499;500;535;536;571;572;607;615;650		157;172;679;691;710;723	SRQ	NYQ	CRQ	NHQ	CRQ	NYQ	SNE	NYQ	SRQNYQCRQNHQCRQNYQSNENYQ	24	Puf3			Puf3		SRQNYQCRQNHQCRQNYQSNENYQ	1
P.anserina.fa__Pans_DSM_980:PODANSg6621.t1	P.anserina.fa	Pans_DSM_980:PODANSg6621.t1	54		Puf4	Puf4		Puf4		S.cerevisiae.fa__YGL014W	N.crassa.fa__NCU11956T0	Puf4	Puf4	Puf4	Puf4	Puf4	Puf4		8	8	285;320;321;356;357;393;394;429;430;465;466;501;502;537;541;576		53;69;152;173;239;255;636;645;648;666;670;691	CRQ	NYQ	TRQ	NHQ	CCQ	NYQ	SNE	NYQ	CRQNYQTRQNHQCCQNYQSNENYQ	24	Puf4			Puf4		NA	NA
P.anserina.fa__Pans_DSM_980:PODANSg2141.t1	P.anserina.fa	Pans_DSM_980:PODANSg2141.t1	54		Puf6			Puf6		S.cerevisiae.fa__YDR496C	N.crassa.fa__NCU09380T0	Puf6	Puf6	Puf6	Puf6	Puf6	Puf6		0	0			515;545										0						NA	NA
P.anserina.fa__Pans_DSM_980:PODANSg6324.t1	P.anserina.fa	Pans_DSM_980:PODANSg6324.t1	54		Puf8	Puf8		Puf8		NA	N.crassa.fa__NCU01760T0	NA	Puf8	NA	Puf8	Puf8	Puf8		8	8	359;394;395;430;431;466;467;502;507;542;543;578;579;614;623;658		285;300	SIQ	NFQ	CHQ	CHQ	SLQ	NWQ	SKE	NYQ	SIQNFQCHQCHQSLQNWQSKENYQ	24	Puf8			Puf8		NA	NA
N.crassa.fa__NCU06118T0	N.crassa.fa	NCU06118T0	55		Nop9			Nop9		S.cerevisiae.fa__YJL010C	NA	Nop9	NA	NA	Nop9	Nop9	Nop9		0	0			197;211;218;232;330;338;523;560;725;747										0						NA	NA
N.crassa.fa__NCU06199T0	N.crassa.fa	NCU06199T0	55		Puf1	Puf1 or Puf2		Puf1		S.cerevisiae.fa__YJR091C	NA	Puf1	NA	NA	Puf1	Puf1	Puf1		6	6	653;688;689;725;726;760;761;797;799;834;836;872	444;513	25;38;313;326;419;432;946;956;962;971;980;1023;1059;1084;1129;1160	NTQ	TWQ	NYQ	ARR	ALT	YLL			NTQTWQNYQARRALTYLL	18		Puf1 or Puf2	Puf1 or 2 - has RRM	Puf1 or Puf2		NA	NA
N.crassa.fa__NCU06511T0	N.crassa.fa	NCU06511T0	55		Puf3	Puf3		Puf3		S.cerevisiae.fa__YLL013C	NA	Puf3	NA	NA	Puf3	Puf3	Puf3		8	8	387;422;423;458;459;494;495;530;533;568;569;604;605;640;658;695		50;64;354;368;744;757	SRQ	NYQ	CRQ	NHQ	CRQ	NYQ	SNE	NYQ	SRQNYQCRQNHQCRQNYQSNENYQ	24	Puf3			Puf3		SRQNYQCRQNHQCRQNYQSNENYQ	1
N.crassa.fa__NCU11956T0	N.crassa.fa	NCU11956T0	55		Puf4	Puf4		Puf4		S.cerevisiae.fa__YGL014W	NA	Puf4	NA	NA	Puf4	Puf4	Puf4		8	8	581;616;617;652;653;689;690;725;726;761;762;797;798;833;836;871		405;418;493;511;899;909;933;955	CRQ	NYQ	TRQ	NHQ	CCQ	NYQ	SNE	NYQ	CRQNYQTRQNHQCCQNYQSNENYQ	24	Puf4			Puf4		NA	NA
N.crassa.fa__NCU09380T0	N.crassa.fa	NCU09380T0	55		Puf6			Puf6		S.cerevisiae.fa__YDR496C	NA	Puf6	NA	NA	Puf6	Puf6	Puf6		0	0			2;20;41;56;318;334;618;632;640;667										0						NA	NA
N.crassa.fa__NCU01760T0	N.crassa.fa	NCU01760T0	55		Puf8	Puf8		Puf8		NA	NA	NA	NA	NA	Puf8	Puf8	Puf8		8	8	422;457;458;493;494;529;530;565;570;605;606;641;642;677;686;721		14;26;114;127;320;332;343;362	SIQ	NFQ	CHQ	CHQ	SLQ	NWQ	SKE	NYQ	SIQNFQCHQCHQSLQNWQSKENYQ	24	Puf8			Puf8		NA	NA
N.discreta.fa__100837	N.discreta.fa	100837	56		Nop9			Nop9		S.cerevisiae.fa__YJL010C	N.crassa.fa__NCU06118T0	Nop9	Nop9	Nop9	Nop9	Nop9	Nop9		6	6	129;164;165;200;231;266;394;429;431;466;623;660		201;215;334;342;527;543;718;737	SRE	SHE	SHR	SRE	CYI	SAN			SRESHESHRSRECYISAN	18						NA	NA
N.discreta.fa__155703	N.discreta.fa	155703	56		Puf1 or Puf2	Puf1 or Puf2		Puf1		S.cerevisiae.fa__YPR042C	N.crassa.fa__NCU06199T0	Puf2	Puf1	not the same	not the same	not the same	Puf1 or Puf2		6	6	658;693;694;730;731;765;766;802;804;839;841;877	449;518	318;331;424;437;952;961;967;976;978;1027;1063;1088;1133;1164	NTQ	TWQ	NYQ	ARR	ALT	YLL			NTQTWQNYQARRALTYLL	18		Puf1 or Puf2	Puf1 or 2 - has RRM	Puf1 or Puf2		NA	NA
N.discreta.fa__126277	N.discreta.fa	126277	56		Puf3	Puf3		Puf3		S.cerevisiae.fa__YLL013C	N.crassa.fa__NCU06511T0	Puf3	Puf3	Puf3	Puf3	Puf3	Puf3		8	8	380;415;416;451;452;487;488;523;526;561;562;597;598;633;651;688		737;750	SRQ	NYQ	CRQ	NHQ	CRQ	NYQ	SNE	NYQ	SRQNYQCRQNHQCRQNYQSNENYQ	24	Puf3			Puf3		SRQNYQCRQNHQCRQNYQSNENYQ	1
N.discreta.fa__65410	N.discreta.fa	65410	56		Puf4	Puf4		Puf4		S.cerevisiae.fa__YGL014W	N.crassa.fa__NCU11956T0	Puf4	Puf4	Puf4	Puf4	Puf4	Puf4		8	8	261;296;297;332;333;369;370;405;406;441;442;477;478;513;516;551		90;103;165;187;621;635;665;672	CRQ	NYQ	TRQ	NHQ	CCQ	NYQ	SNE	NYQ	CRQNYQTRQNHQCCQNYQSNENYQ	24	Puf4			Puf4		NA	NA
N.discreta.fa__92657	N.discreta.fa	92657	56		Puf6			Puf6		S.cerevisiae.fa__YDR496C	N.crassa.fa__NCU09380T0	Puf6	Puf6	Puf6	Puf6	Puf6	Puf6		4	0	138;173;174;209;210;246;333;368		2;20;42;56;631;665	VRQ	KFG	SWD	ARC					VRQKFGSWDARC	12						NA	NA
N.discreta.fa__141508	N.discreta.fa	141508	56		Puf8	Puf8		Puf8		NA	N.crassa.fa__NCU01760T0	NA	Puf8	NA	Puf8	Puf8	Puf8		8	8	422;457;458;493;494;529;530;565;570;605;606;641;642;677;686;721		14;26;114;127;320;331;344;357	SIQ	NFQ	CHQ	CHQ	SLQ	NWQ	SKE	NYQ	SIQNFQCHQCHQSLQNWQSKENYQ	24	Puf8			Puf8		NA	NA
N.tetrasperma.fa__66960	N.tetrasperma.fa	66960	57		Nop9			Nop9		S.cerevisiae.fa__YJL010C	N.crassa.fa__NCU06118T0	Nop9	Nop9	Nop9	Nop9	Nop9	Nop9		6	0	125;160;161;196;227;262;390;425;427;462;633;670		197;211;218;232;330;338;536;558;728;747;757;772	SRE	SHE	SHR	SRE	CYI	SAN			SRESHESHRSRECYISAN	18						NA	NA
N.tetrasperma.fa__146166	N.tetrasperma.fa	146166	57		Puf1 or Puf2	Puf1 or Puf2		Puf1		S.cerevisiae.fa__YPR042C	N.crassa.fa__NCU06199T0	Puf2	Puf1	not the same	not the same	not the same	Puf1 or Puf2		6	6	653;688;689;725;726;760;761;797;799;834;836;872	444;513	25;38;313;326;419;432;946;956;962;971;973;1018;1054;1079;1124;1155	NTQ	TWQ	NYQ	ARR	ALT	YLL			NTQTWQNYQARRALTYLL	18		Puf1 or Puf2	Puf1 or 2 - has RRM	Puf1 or Puf2		NA	NA
N.tetrasperma.fa__121965	N.tetrasperma.fa	121965	57		Puf3	Puf3		Puf3		S.cerevisiae.fa__YLL013C	N.crassa.fa__NCU06511T0	Puf3	Puf3	Puf3	Puf3	Puf3	Puf3		8	8	383;418;419;454;455;490;491;526;529;564;565;600;601;636;654;691		58;72;350;364	SRQ	NYQ	CRQ	NHQ	CRQ	NYQ	SNE	NYQ	SRQNYQCRQNHQCRQNYQSNENYQ	24	Puf3			Puf3		SRQNYQCRQNHQCRQNYQSNENYQ	1
N.tetrasperma.fa__65206	N.tetrasperma.fa	65206	57		Puf4	Puf4		Puf4		S.cerevisiae.fa__YGL014W	N.crassa.fa__NCU11956T0	Puf4	Puf4	Puf4	Puf4	Puf4	Puf4		8	8	265;300;301;336;337;373;374;409;410;445;446;481;482;517;520;555		90;103;178;196;583;593;619;639	CRQ	NYQ	TRQ	NHQ	CCQ	NYQ	SNE	NYQ	CRQNYQTRQNHQCCQNYQSNENYQ	24	Puf4			Puf4		NA	NA
N.tetrasperma.fa__150323	N.tetrasperma.fa	150323	57		Puf6			Puf6		S.cerevisiae.fa__YDR496C	N.crassa.fa__NCU09380T0	Puf6	Puf6	Puf6	Puf6	Puf6	Puf6		4	0	138;173;174;209;210;246;333;368		2;20;41;56;318;334;618;632;640;659	VRQ	KFG	SWD	ARC					VRQKFGSWDARC	12						NA	NA
N.tetrasperma.fa__65175	N.tetrasperma.fa	65175	57		Puf8	Puf8		Puf8		NA	N.crassa.fa__NCU01760T0	NA	Puf8	NA	Puf8	Puf8	Puf8		8	8	422;457;458;493;494;529;530;565;570;605;606;641;642;677;686;721		14;26;114;127;320;331	SIQ	NFQ	CHQ	CHQ	SLQ	NWQ	SKE	NYQ	SIQNFQCHQCHQSLQNWQSKENYQ	24	Puf8			Puf8		NA	NA
M.oryzae.fa__MGG_03872T0	M.oryzae.fa	MGG_03872T0	58		Nop9			Nop9		S.cerevisiae.fa__YJL010C	N.crassa.fa__NCU06118T0	Nop9	Nop9	Nop9	Nop9	Nop9	Nop9		4	4	106;141;142;177;213;248;418;454		316;326;768;780	SRE	SHE	SHR	TYM					SRESHESHRTYM	12						NA	NA
M.oryzae.fa__MGG_06318T0	M.oryzae.fa	MGG_06318T0	58		Puf1	Puf1 or Puf2		Puf1		S.cerevisiae.fa__YJR091C	N.crassa.fa__NCU06199T0	Puf1	Puf1	Puf1	Puf1	Puf1	Puf1		6	6	640;675;676;712;713;747;748;784;786;821;823;859	431;500	15;33;299;309;315;332;339;351;416;427;963;998;1060;1071	NTQ	TWQ	NYQ	ARR	ALT	YLL			NTQTWQNYQARRALTYLL	18		Puf1 or Puf2	Puf1 or 2 - has RRM	Puf1 or Puf2		NA	NA
M.oryzae.fa__MGG_04985T0	M.oryzae.fa	MGG_04985T0	58		Puf3	Puf3		Puf3		S.cerevisiae.fa__YLL013C	N.crassa.fa__NCU06511T0	Puf3	Puf3	Puf3	Puf3	Puf3	Puf3		8	8	480;515;516;551;552;587;588;623;624;659;660;695;696;731;739;774		800;811;829;853	SRQ	NYQ	CRQ	NHQ	CRQ	NYQ	SNE	NYQ	SRQNYQCRQNHQCRQNYQSNENYQ	24	Puf3			Puf3		SRQNYQCRQNHQCRQNYQSNENYQ	1
M.oryzae.fa__MGG_14563T0	M.oryzae.fa	MGG_14563T0	58		Puf4	Puf4		Puf4		S.cerevisiae.fa__YGL014W	N.crassa.fa__NCU11956T0	Puf4	Puf4	Puf4	Puf4	Puf4	Puf4		8	8	592;627;628;663;664;700;701;736;737;772;773;808;809;844;847;882		60;77;371;383;402;415;435;451;475;482;941;965;981;996;1016;1029	CRQ	NYQ	TRQ	NHQ	CCQ	NYQ	SNE	NYQ	CRQNYQTRQNHQCCQNYQSNENYQ	24	Puf4			Puf4		NA	NA
M.oryzae.fa__MGG_13803T0	M.oryzae.fa	MGG_13803T0	58		Puf6			Puf6		S.cerevisiae.fa__YDR496C	N.crassa.fa__NCU09380T0	Puf6	Puf6	Puf6	Puf6	Puf6	Puf6		0	0			11;29;647;664;691;708										0						NA	NA
M.oryzae.fa__MGG_03158T0	M.oryzae.fa	MGG_03158T0	58		Puf8	Puf8		Puf8		NA	N.crassa.fa__NCU01760T0	NA	Puf8	NA	Puf8	Puf8	Puf8		8	8	423;458;459;494;495;530;531;566;571;606;607;642;643;678;687;722		12;28;215;226;342;357	SIQ	NFQ	CHQ	CHQ	SLQ	NWQ	SKE	NYQ	SIQNFQCHQCHQSLQNWQSKENYQ	24	Puf8			Puf8		NA	NA
V.albo-atrum.fa__VDBG_06774T0	V.albo-atrum.fa	VDBG_06774T0	59		Puf1 or Puf2	Puf1 or Puf2		Puf1		S.cerevisiae.fa__YPR042C	N.crassa.fa__NCU06199T0	Puf2	Puf1	not the same	not the same	not the same	Puf1 or Puf2		5	5	615;650;651;686;688;722;723;759;761;796	403;472	62;75;124;133;159;171;270;287;291;306;883;895;932;985	NTQ	TWQ	NYQ	ARR	ALT				NTQTWQNYQARRALT	15			Puf1 or 2 - has RRM	Puf1 or Puf2		NA	NA
V.albo-atrum.fa__VDBG_06846T0	V.albo-atrum.fa	VDBG_06846T0	59		Puf3	Puf3		Puf3		S.cerevisiae.fa__YLL013C	N.crassa.fa__NCU06511T0	Puf3	Puf3	Puf3	Puf3	Puf3	Puf3		8	8	451;486;487;522;523;558;559;594;595;630;631;666;667;702;710;745		81;97;175;188;219;241;772;786;810;825	SRQ	NYQ	CRQ	NHQ	CRQ	NYQ	SNE	NYQ	SRQNYQCRQNHQCRQNYQSNENYQ	24	Puf3			Puf3		SRQNYQCRQNHQCRQNYQSNENYQ	1
V.albo-atrum.fa__VDBG_05326T0	V.albo-atrum.fa	VDBG_05326T0	59		Puf4	Puf4		Puf4		S.cerevisiae.fa__YGL014W	N.crassa.fa__NCU11956T0	Puf4	Puf4	Puf4	Puf4	Puf4	Puf4		8	8	764;799;800;835;836;872;873;908;909;944;945;980;981;1016;1019;1054		68;81;445;467;560;573;630;654	CRQ	NYQ	TRQ	NHQ	CCQ	NYQ	SNE	NYQ	CRQNYQTRQNHQCCQNYQSNENYQ	24	Puf4			Puf4		NA	NA
V.albo-atrum.fa__VDBG_05132T0	V.albo-atrum.fa	VDBG_05132T0	59		Puf6			Puf6		S.cerevisiae.fa__YDR496C	N.crassa.fa__NCU09380T0	Puf6	Puf6	Puf6	Puf6	Puf6	Puf6		0	0			24;41;48;64										0						NA	NA
V.albo-atrum.fa__VDBG_05223T0	V.albo-atrum.fa	VDBG_05223T0	59		Puf8	Puf8		Puf8		NA	N.crassa.fa__NCU01760T0	NA	Puf8	NA	Puf8	Puf8	Puf8		8	8	408;442;443;478;479;514;515;550;555;590;591;626;627;662;671;706		278;293;304;324;736;751	IFQ	NFQ	CHQ	CHQ	SLQ	NWQ	SKE	NYQ	IFQNFQCHQCHQSLQNWQSKENYQ	24		Puf8 - 2 a.a. different		Puf8		NA	NA
V.dahliae.fa__VDAG_02260T0	V.dahliae.fa	VDAG_02260T0	60		Nop9			Nop9		S.cerevisiae.fa__YJL010C	N.crassa.fa__NCU06118T0	Nop9	Nop9	Nop9	Nop9	Nop9	Nop9		5	0	129;164;165;200;324;360;387;422;612;648		64;75;209;222;341;352;355;366;493;504;687;705;720;738	SRE	SHE	NPQ	SRE	HNN				SRESHENPQSREHNN	15						NA	NA
V.dahliae.fa__VDAG_05840T0	V.dahliae.fa	VDAG_05840T0	60		Puf1	Puf1 or Puf2		Puf1		S.cerevisiae.fa__YJR091C	N.crassa.fa__NCU06199T0	Puf1	Puf1	Puf1	Puf1	Puf1	Puf1		6	6	617;652;653;688;690;724;725;761;763;798;800;836	405;474	47;60;109;118;144;156;272;289;293;308;346;358;1003;1014;1057;1104	NTQ	TWQ	NYQ	ARR	ALT	YLL			NTQTWQNYQARRALTYLL	18		Puf1 or Puf2	Puf1 or 2 - has RRM	Puf1 or Puf2		NA	NA
V.dahliae.fa__VDAG_05909T0	V.dahliae.fa	VDAG_05909T0	60		Puf3	Puf3		Puf3		S.cerevisiae.fa__YLL013C	N.crassa.fa__NCU06511T0	Puf3	Puf3	Puf3	Puf3	Puf3	Puf3		8	8	424;459;460;495;496;531;532;567;568;603;604;639;640;675;683;718		67;83;184;210;745;759;783;798	SRQ	NYQ	CRQ	NHQ	CRQ	NYQ	SNE	NYQ	SRQNYQCRQNHQCRQNYQSNENYQ	24	Puf3			Puf3		SRQNYQCRQNHQCRQNYQSNENYQ	1
V.dahliae.fa__VDAG_06977T0	V.dahliae.fa	VDAG_06977T0	60		Puf4	Puf4		Puf4		S.cerevisiae.fa__YGL014W	N.crassa.fa__NCU11956T0	Puf4	Puf4	Puf4	Puf4	Puf4	Puf4		8	8	443;478;479;514;515;551;552;587;588;623;624;659;660;695;698;733		117;146;239;252;831;844;848;892	CRQ	NYQ	TRQ	NHQ	CCQ	NYQ	SNE	NYQ	CRQNYQTRQNHQCCQNYQSNENYQ	24	Puf4			Puf4		NA	NA
V.dahliae.fa__VDAG_08809T0	V.dahliae.fa	VDAG_08809T0	60		Puf6			Puf6		S.cerevisiae.fa__YDR496C	N.crassa.fa__NCU09380T0	Puf6	Puf6	Puf6	Puf6	Puf6	Puf6		5	0	154;189;190;225;226;262;349;384;385;422		24;40;47;63;73;85	VRQ	KFA	SWD	SRC	HML				VRQKFASWDSRCHML	15						NA	NA
V.dahliae.fa__VDAG_08882T0	V.dahliae.fa	VDAG_08882T0	60		Puf8	Puf8		Puf8		NA	N.crassa.fa__NCU01760T0	NA	Puf8	NA	Puf8	Puf8	Puf8		8	8	408;442;443;478;479;514;515;550;555;590;591;626;627;662;671;706		278;293;307;324;731;759	IFQ	NFQ	CHQ	CHQ	SLQ	NWQ	SKE	NYQ	IFQNFQCHQCHQSLQNWQSKENYQ	24		Puf8 - 2 a.a. different		Puf8		NA	NA
T.reesei.fa__60879	T.reesei.fa	60879	61		Nop9			Nop9		S.cerevisiae.fa__YJL010C	N.crassa.fa__NCU06118T0	Nop9	Nop9	Nop9	Nop9	Nop9	Nop9		5	0	48;83;84;119;236;271;305;340;527;561		254;264;266;279;440;448	SRE	SHE	NPQ	SRE	HNN				SRESHENPQSREHNN	15						NA	NA
T.reesei.fa__35183	T.reesei.fa	35183	61		Puf1 or Puf2	Puf1 or Puf2		Puf1		S.cerevisiae.fa__YPR042C	N.crassa.fa__NCU06199T0	Puf2	Puf1	not the same	not the same	not the same	Puf1 or Puf2		6	6	607;642;643;679;680;714;715;751;753;788;790;826	396;465	264;282;307;321	NTQ	TWQ	NYQ	ARR	ALT	YLL			NTQTWQNYQARRALTYLL	18		Puf1 or Puf2	Puf1 or 2 - has RRM	Puf1 or Puf2		NA	NA
T.reesei.fa__61532	T.reesei.fa	61532	61	possibly missing N-terminus, Puf domain intact	Puf3	Puf3		Puf3		S.cerevisiae.fa__YLL013C	N.crassa.fa__NCU06511T0	Puf3	Puf3	Puf3	Puf3	Puf3	Puf3		8	8	24;59;60;95;96;131;132;167;168;203;204;239;240;275;283;318			SRQ	NYQ	CRQ	NHQ	CRQ	NYQ	SNE	NYQ	SRQNYQCRQNHQCRQNYQSNENYQ	24	Puf3			Puf3		SRQNYQCRQNHQCRQNYQSNENYQ	1
T.reesei.fa__62880	T.reesei.fa	62880	61		Puf4	Puf4		Puf4		S.cerevisiae.fa__YGL014W	N.crassa.fa__NCU11956T0	Puf4	Puf4	Puf4	Puf4	Puf4	Puf4		8	8	313;349;350;385;386;422;423;458;459;494;495;530;531;566;567;602		129;145;188;226;248;263	CRQ	NYQ	TRQ	NHQ	CCQ	NYQ	SNE	NYQ	CRQNYQTRQNHQCCQNYQSNENYQ	24	Puf4			Puf4		NA	NA
T.reesei.fa__109443	T.reesei.fa	109443	61		Puf6			Puf6		S.cerevisiae.fa__YDR496C	N.crassa.fa__NCU09380T0	Puf6	Puf6	Puf6	Puf6	Puf6	Puf6		5	0	101;136;137;172;173;209;296;331;332;369		382;392;441;458;605;628	VRQ	KFG	SWD	AKC	HLL				VRQKFGSWDAKCHLL	15						NA	NA
T.reesei.fa__53314	T.reesei.fa	53314	61		Puf8	Puf8		Puf8		NA	N.crassa.fa__NCU01760T0	NA	Puf8	NA	Puf8	Puf8	Puf8		8	8	388;423;424;459;460;495;496;531;536;571;572;607;608;643;652;687		160;176;198;207;282;301;718;736	SIQ	NFQ	CHQ	CHQ	SLQ	NWQ	SKE	NYQ	SIQNFQCHQCHQSLQNWQSKENYQ	24	Puf8			Puf8		NA	NA
T.virens.fa__12335	T.virens.fa	12335	62		Nop9			Nop9		S.cerevisiae.fa__YJL010C	N.crassa.fa__NCU06118T0	Nop9	Nop9	Nop9	Nop9	Nop9	Nop9		4	0	48;83;84;119;300;335;337;372		253;263;435;443	SRE	SHE	SRE	CYI					SRESHESRECYI	12						NA	NA
T.virens.fa__168508	T.virens.fa	168508	62		Puf1	Puf1 or Puf2		Puf1		S.cerevisiae.fa__YJR091C	N.crassa.fa__NCU06199T0	Puf1	Puf1	Puf1	Puf1	Puf1	Puf1		6	6	663;698;699;735;736;770;771;807;809;844;846;882	452;521	14;28;90;103;129;143;319;334;340;354;363;377;564;582;981;990;1028;1045;1095;1138	NTQ	TWQ	NYQ	ARR	ALT	YLL			NTQTWQNYQARRALTYLL	18		Puf1 or Puf2	Puf1 or 2 - has RRM	Puf1 or Puf2		NA	NA
T.virens.fa__165243	T.virens.fa	165243	62	possibly missing N-terminus, Puf domain intact	Puf3	Puf3		Puf3		S.cerevisiae.fa__YLL013C	N.crassa.fa__NCU06511T0	Puf3	Puf3	Puf3	Puf3	Puf3	Puf3		7	7	24;59;60;95;96;131;132;167;168;203;204;239;240;275			SRQ	NYQ	CRQ	NHQ	CRQ	NYQ	SNE		SRQNYQCRQNHQCRQNYQSNE	21		Puf3 - missing rep8		Puf3		SRQNYQCRQNHQCRQNYQSNENYR	0
T.virens.fa__164108	T.virens.fa	164108	62		Puf4	Puf4		Puf4		S.cerevisiae.fa__YGL014W	N.crassa.fa__NCU11956T0	Puf4	Puf4	Puf4	Puf4	Puf4	Puf4		8	8	323;358;359;394;395;431;432;467;468;503;504;539;540;575;576;611		138;151;201;228;242;251;275;291;676;692;697;715	CRQ	NYQ	TRQ	NHQ	CCQ	NYQ	SNE	NYQ	CRQNYQTRQNHQCCQNYQSNENYQ	24	Puf4			Puf4		NA	NA
T.virens.fa__72226	T.virens.fa	72226	62		Puf6			Puf6		S.cerevisiae.fa__YDR496C	N.crassa.fa__NCU09380T0	Puf6	Puf6	Puf6	Puf6	Puf6	Puf6		5	1	102;137;138;173;174;210;297;332;333;370		386;393	VRQ	KFG	SWD	ARC	HLL				VRQKFGSWDARCHLL	15						NA	NA
T.virens.fa__189802	T.virens.fa	189802	62		Puf8	Puf8		Puf8		NA	N.crassa.fa__NCU01760T0	NA	Puf8	NA	Puf8	Puf8	Puf8		8	8	388;423;424;459;460;495;496;531;536;571;572;607;608;643;652;687		160;176;283;293;718;725	SIQ	NFQ	CHQ	CHQ	SLQ	NWQ	SKE	NYQ	SIQNFQCHQCHQSLQNWQSKENYQ	24	Puf8			Puf8		NA	NA
T.atroviride.fa__222809	T.atroviride.fa	222809	63		Nop9			Nop9		S.cerevisiae.fa__YJL010C	N.crassa.fa__NCU06118T0	Nop9	Nop9	Nop9	Nop9	Nop9	Nop9		5	0	101;136;137;172;288;323;354;389;575;609		35;46;306;316;318;330;331;342;489;497;544;558;671;689	SRE	SHE	NPQ	SRE	HNN				SRESHENPQSREHNN	15						NA	NA
T.atroviride.fa__171818	T.atroviride.fa	171818	63		Puf1 or Puf2	Puf1 or Puf2		Puf1		S.cerevisiae.fa__YPR042C	N.crassa.fa__NCU06199T0	Puf2	Puf1	not the same	not the same	not the same	Puf1 or Puf2		6	6	665;700;701;737;738;772;773;809;811;846;848;884	454;523	14;28;49;66;90;103;192;206;324;339;345;359;557;577;982;990;1016;1027;1056;1070;1097;1134	NTQ	TWQ	NYQ	ARR	ALT	YLL			NTQTWQNYQARRALTYLL	18		Puf1 or Puf2	Puf1 or 2 - has RRM	Puf1 or Puf2		NA	NA
T.atroviride.fa__147678	T.atroviride.fa	147678	63	possibly missing N-terminus, Puf domain intact	Puf3	Puf3		Puf3		S.cerevisiae.fa__YLL013C	N.crassa.fa__NCU06511T0	Puf3	Puf3	Puf3	Puf3	Puf3	Puf3		8	8	24;59;60;95;96;131;132;167;168;203;204;239;240;275;283;318		339;354;372;381	SRQ	NYQ	CRQ	NHQ	CRQ	NYQ	SNE	NYQ	SRQNYQCRQNHQCRQNYQSNENYQ	24	Puf3			Puf3		SRQNYQCRQNHQCRQNYQSNENYQ	1
T.atroviride.fa__153608	T.atroviride.fa	153608	63		Puf4	Puf4		Puf4		S.cerevisiae.fa__YGL014W	N.crassa.fa__NCU11956T0	Puf4	Puf4	Puf4	Puf4	Puf4	Puf4		8	8	323;358;359;394;395;431;432;467;470;505;506;541;542;577;580;615		134;147;233;246;256;273;707;725	CRQ	NYQ	TRQ	NHQ	CCQ	NYQ	SNE	NYQ	CRQNYQTRQNHQCCQNYQSNENYQ	24	Puf4			Puf4		NA	NA
T.atroviride.fa__148795	T.atroviride.fa	148795	63		Puf6			Puf6		S.cerevisiae.fa__YDR496C	N.crassa.fa__NCU09380T0	Puf6	Puf6	Puf6	Puf6	Puf6	Puf6		5	0	101;136;137;172;173;209;296;331;332;369		382;392;440;458	VRQ	KFG	SWD	AKC	HIL				VRQKFGSWDAKCHIL	15						NA	NA
T.atroviride.fa__271011	T.atroviride.fa	271011	63		Puf8	Puf8		Puf8		NA	N.crassa.fa__NCU01760T0	NA	Puf8	NA	Puf8	Puf8	Puf8		8	8	406;441;442;477;478;513;514;549;554;589;590;625;626;661;670;705		2;10;180;192;213;225;300;318;736;745	SIQ	NFQ	CHQ	CHQ	SLQ	NWQ	SKE	NYQ	SIQNFQCHQCHQSLQNWQSKENYQ	24	Puf8			Puf8		NA	NA
N.haematococca.fa__92643	N.haematococca.fa	92643	64		Nop9			Nop9		S.cerevisiae.fa__YJL010C	N.crassa.fa__NCU06118T0	Nop9	Nop9	Nop9	Nop9	Nop9	Nop9		0	0			12;22;305;315;479;487;536;554										0						NA	NA
N.haematococca.fa__37587	N.haematococca.fa	37587	64		Puf1 or Puf2	Puf1 or Puf2		Puf1		S.cerevisiae.fa__YPR042C	N.crassa.fa__NCU06199T0	Puf2	Puf1	not the same	not the same	not the same	Puf1 or Puf2		6	6	663;698;699;735;736;770;771;807;809;844;846;882	453;522	320;333;556;577;1047;1055;1116;1141	NTQ	TWQ	NYQ	ARR	ALT	YLL			NTQTWQNYQARRALTYLL	18		Puf1 or Puf2	Puf1 or 2 - has RRM	Puf1 or Puf2		NA	NA
N.haematococca.fa__38196	N.haematococca.fa	38196	64		Puf3	Puf3		Puf3		S.cerevisiae.fa__YLL013C	N.crassa.fa__NCU06511T0	Puf3	Puf3	Puf3	Puf3	Puf3	Puf3		8	8	77;112;113;148;149;184;185;220;221;256;257;292;293;328;336;368		64;72	SRQ	NYQ	CRQ	NHQ	CRQ	NYQ	SNE	NYR	SRQNYQCRQNHQCRQNYQSNENYR	24		Puf3 - 1 a.a. different		Puf3		SRQNYQCRQNHQCRQNYQSNENYR	0
N.haematococca.fa__65753	N.haematococca.fa	65753	64		Puf4	Puf4		Puf4		S.cerevisiae.fa__YGL014W	N.crassa.fa__NCU11956T0	Puf4	Puf4	Puf4	Puf4	Puf4	Puf4		8	8	360;395;396;431;432;468;469;504;505;540;541;576;577;612;615;650		164;184;226;275;296;310;720;729;777;795;815;825	CRQ	NYQ	TRQ	NHQ	CCQ	NYQ	SNE	NYQ	CRQNYQTRQNHQCCQNYQSNENYQ	24	Puf4			Puf4		NA	NA
N.haematococca.fa__57318	N.haematococca.fa	57318	64		Puf6			Puf6		S.cerevisiae.fa__YDR496C	N.crassa.fa__NCU09380T0	Puf6	Puf6	Puf6	Puf6	Puf6	Puf6		0	0			410;421;475;496;651;662										0						NA	NA
N.haematococca.fa__92532	N.haematococca.fa	92532	64		Puf8	Puf8		Puf8		NA	N.crassa.fa__NCU01760T0	NA	Puf8	NA	Puf8	Puf8	Puf8		8	8	385;420;421;456;457;492;493;528;533;568;569;604;605;640;649;684		88;102;248;267;272;282	SIQ	NFQ	CHQ	CHQ	SLQ	NWQ	SKE	NYQ	SIQNFQCHQCHQSLQNWQSKENYQ	24	Puf8			Puf8		NA	NA
F.graminearum.fa__FGSG_07038T0	F.graminearum.fa	FGSG_07038T0	65		Nop9			Nop9		S.cerevisiae.fa__YJL010C	N.crassa.fa__NCU06118T0	Nop9	Nop9	Nop9	Nop9	Nop9	Nop9		0	0			308;318;482;493;539;550;677;698										0						NA	NA
F.graminearum.fa__FGSG_13028T0	F.graminearum.fa	FGSG_13028T0	65		Puf1 or Puf2	Puf1 or Puf2		Puf1		S.cerevisiae.fa__YPR042C	N.crassa.fa__NCU06199T0	Puf2	Puf1	not the same	not the same	not the same	Puf1 or Puf2		6	6	274;309;310;345;347;381;382;418;420;455;457;493	64;133	178;192;652;666;670;680;724;751	NTQ	TWQ	NYQ	ARR	ALT	YLL			NTQTWQNYQARRALTYLL	18		Puf1 or Puf2	Puf1 or 2 - has RRM	Puf1 or Puf2		NA	NA
F.graminearum.fa__FGSG_06710T0	F.graminearum.fa	FGSG_06710T0	65		Puf3	Puf3		Puf3		NA	N.crassa.fa__NCU06511T0	NA	Puf3	NA	NA	NA	Puf3		8	8	233;268;269;304;305;340;343;378;379;414;415;450;451;486;493;528		27;38;94;107	SRQ	NYQ	CRQ	NHQ	CRQ	NYG	SHE	NYA	SRQNYQCRQNHQCRQNYGSHENYA	24		Puf3 - 3 a.a. different		Puf3		SRQNYQCRQNHQCRQNYGSHENYA	0
F.graminearum.fa__FGSG_00841T0	F.graminearum.fa	FGSG_00841T0	65		Puf4	Puf4		Puf4		S.cerevisiae.fa__YGL014W	N.crassa.fa__NCU11956T0	Puf4	Puf4	Puf4	Puf4	Puf4	Puf4		8	8	342;377;378;413;414;450;451;486;487;522;523;558;559;594;597;632		749;761	CRQ	NYQ	TRQ	NHQ	CCQ	NYQ	SNE	NYQ	CRQNYQTRQNHQCCQNYQSNENYQ	24	Puf4			Puf4		NA	NA
F.graminearum.fa__FGSG_01128T0	F.graminearum.fa	FGSG_01128T0	65		Puf6			Puf6		S.cerevisiae.fa__YDR496C	N.crassa.fa__NCU09380T0	Puf6	Puf6	Puf6	Puf6	Puf6	Puf6		0	0			44;61;414;425;621;640;655;667										0						NA	NA
F.graminearum.fa__FGSG_05203T0	F.graminearum.fa	FGSG_05203T0	65		Puf8	Puf8		Puf8		NA	N.crassa.fa__NCU01760T0	NA	Puf8	NA	Puf8	Puf8	Puf8		8	8	415;450;451;486;487;522;523;558;563;598;599;634;635;670;679;714		120;134;253;267;333;353;740;762	SIQ	NFQ	CHQ	CHQ	SLQ	NWQ	SKE	NYQ	SIQNFQCHQCHQSLQNWQSKENYQ	24	Puf8			Puf8		NA	NA
F.oxysporum.fa__FOXG_01770T0	F.oxysporum.fa	FOXG_01770T0	66		Nop9			Nop9		S.cerevisiae.fa__YJL010C	N.crassa.fa__NCU06118T0	Nop9	Nop9	Nop9	Nop9	Nop9	Nop9		5	0	107;142;143;178;207;243;351;386;569;603		246;255;309;319;483;491;540;558;670;691;705;762	SRE	SHE	SHR	SRE	HNN				SRESHESHRSREHNN	15						NA	NA
F.oxysporum.fa__FOXG_01859T0	F.oxysporum.fa	FOXG_01859T0	66		Puf1 or Puf2	Puf1 or Puf2		Puf1		S.cerevisiae.fa__YPR042C	N.crassa.fa__NCU06199T0	Puf2	Puf1	not the same	not the same	not the same	Puf1 or Puf2		6	6	659;694;695;731;732;766;767;803;805;840;842;878	449;518	14;31;151;163;191;202;318;329;562;577;1043;1051;1109;1136	NTQ	TWQ	NYQ	ARR	ALT	YLL			NTQTWQNYQARRALTYLL	18		Puf1 or Puf2	Puf1 or 2 - has RRM	Puf1 or Puf2		NA	NA
F.oxysporum.fa__FOXG_02224T0	F.oxysporum.fa	FOXG_02224T0	66		Puf3	Puf3		Puf3		NA	N.crassa.fa__NCU06511T0	NA	Puf3	NA	NA	NA	Puf3		7	7	308;343;344;379;380;415;416;451;452;487;488;523;531;566		32;47	NYQ	CRQ	NHQ	CRQ	NYQ	SNE	NYK		NYQCRQNHQCRQNYQSNENYK	21		Puf3 - rep1 missing, 1 a.a. different		Puf3		SRQNYQCRQNHQCRQNYQSNENYK	0
F.oxysporum.fa__FOXG_00799T0	F.oxysporum.fa	FOXG_00799T0	66		Puf4	Puf4		Puf4		S.cerevisiae.fa__YGL014W	N.crassa.fa__NCU11956T0	Puf4	Puf4	Puf4	Puf4	Puf4	Puf4		8	8	608;643;644;679;680;716;717;752;753;788;789;824;825;860;863;898		297;320;416;428;485;510;1009;1034	CRQ	NYQ	TRQ	NHQ	CCQ	NYQ	SNE	NYQ	CRQNYQTRQNHQCCQNYQSNENYQ	24	Puf4			Puf4		NA	NA
F.oxysporum.fa__FOXG_00261T0	F.oxysporum.fa	FOXG_00261T0	66		Puf6			Puf6		S.cerevisiae.fa__YDR496C	N.crassa.fa__NCU09380T0	Puf6	Puf6	Puf6	Puf6	Puf6	Puf6		4	1	141;176;177;212;213;249;336;371		42;57;623;656;657;672	VRQ	KFG	SWD	AKC					VRQKFGSWDAKC	12						NA	NA
F.oxysporum.fa__FOXG_07983T0	F.oxysporum.fa	FOXG_07983T0	66		Puf8	Puf8		Puf8		NA	N.crassa.fa__NCU01760T0	NA	Puf8	NA	Puf8	Puf8	Puf8		8	8	415;450;451;486;487;522;523;558;563;598;599;634;635;670;679;714		286;297;301;310;321;332;744;762	SIQ	NFQ	CHQ	CHQ	SLQ	NWQ	SKE	NYQ	SIQNFQCHQCHQSLQNWQSKENYQ	24	Puf8			Puf8		NA	NA
F.verticillioides.fa__FVEG_08142T0	F.verticillioides.fa	FVEG_08142T0	67		Nop9			Nop9		S.cerevisiae.fa__YJL010C	N.crassa.fa__NCU06118T0	Nop9	Nop9	Nop9	Nop9	Nop9	Nop9		5	0	107;142;143;178;207;243;351;386;569;603		309;319;540;558;667;687;717;766	SRE	SHE	SHR	SRE	HNN				SRESHESHRSREHNN	15						NA	NA
F.verticillioides.fa__FVEG_08236T0	F.verticillioides.fa	FVEG_08236T0	67		Puf1 or Puf2	Puf1 or Puf2		Puf1		S.cerevisiae.fa__YPR042C	N.crassa.fa__NCU06199T0	Puf2	Puf1	not the same	not the same	not the same	Puf1 or Puf2		6	6	659;694;695;731;732;766;767;803;805;840;842;878	449;518	14;31;191;202;319;329;1043;1051;1109;1136	NTQ	TWQ	NYQ	ARR	ALT	YLL			NTQTWQNYQARRALTYLL	18		Puf1 or Puf2	Puf1 or 2 - has RRM	Puf1 or Puf2		NA	NA
F.verticillioides.fa__FVEG_05396T0	F.verticillioides.fa	FVEG_05396T0	67		Puf3	Puf3		Puf3		NA	N.crassa.fa__NCU06511T0	NA	Puf3	NA	NA	NA	Puf3		7	7	310;345;346;381;382;417;418;453;454;489;490;525;533;568		35;47	NYQ	CRQ	NHQ	CRQ	NYQ	SNE	NYK		NYQCRQNHQCRQNYQSNENYK	21		Puf3 - rep1 missing, 1 a.a. different		Puf3		SRQNYQCRQNHQCRQNYQSNENYK	0
F.verticillioides.fa__FVEG_00716T0	F.verticillioides.fa	FVEG_00716T0	67		Puf4	Puf4		Puf4		S.cerevisiae.fa__YGL014W	N.crassa.fa__NCU11956T0	Puf4	Puf4	Puf4	Puf4	Puf4	Puf4		8	8	608;643;644;679;680;716;717;752;753;788;789;824;825;860;863;898		297;320;416;428;491;510;964;976;1014;1040	CRQ	NYQ	TRQ	NHQ	CCQ	NYQ	SNE	NYQ	CRQNYQTRQNHQCCQNYQSNENYQ	24	Puf4			Puf4		NA	NA
F.verticillioides.fa__FVEG_01255T0	F.verticillioides.fa	FVEG_01255T0	67		Puf6			Puf6		S.cerevisiae.fa__YDR496C	N.crassa.fa__NCU09380T0	Puf6	Puf6	Puf6	Puf6	Puf6	Puf6		4	1	141;176;177;212;213;249;336;371		42;57;417;428;623;656;658;669	VRQ	KFG	SWD	AKC					VRQKFGSWDAKC	12						NA	NA
F.verticillioides.fa__FVEG_04902T0	F.verticillioides.fa	FVEG_04902T0	67		Puf8	Puf8		Puf8		NA	N.crassa.fa__NCU01760T0	NA	Puf8	NA	Puf8	Puf8	Puf8		8	8	396;431;432;467;468;503;504;539;544;579;580;615;616;651;660;695		267;278;282;291;725;743	SIQ	NFQ	CHQ	CHQ	SLQ	NWQ	SKE	NYQ	SIQNFQCHQCHQSLQNWQSKENYQ	24	Puf8			Puf8		NA	NA
S.japonicus.fa__SJAG_02250T0	S.japonicus.fa	SJAG_02250T0	68		Nop9			Nop9		S.cerevisiae.fa__YJL010C	N.crassa.fa__NCU06118T0	Nop9	Nop9	Nop9	Nop9	Nop9	Nop9		8	8	89;124;125;159;185;217;249;285;302;337;338;373;478;515;516;553			SKE	SFE	AHE	SRQ	SRE	NFQ	SHE	SHD	SKESFEAHESRQSRENFQSHESHD	24						NA	NA
S.japonicus.fa__SJAG_00391T0	S.japonicus.fa	SJAG_00391T0	68		Puf1	Puf1 or Puf2		Puf1		S.cerevisiae.fa__YJR091C	N.crassa.fa__NCU06199T0	Puf1	Puf1	Puf1	Puf1	Puf1	Puf1		4	4	650;685;686;722;723;757;833;869	466;535	161;173;208;222;257;268;288;311;350;361;399;420;426;436;538;563;791;807	NTQ	TWQ	NYQ	STL					NTQTWQNYQSTL	12		Puf1 or Puf2	Puf1 or 2 - has RRM	Puf1 or Puf2		NA	NA
S.japonicus.fa__SJAG_03979T0	S.japonicus.fa	SJAG_03979T0	68	possibly missing N and C-terminus, RRM truncated, Puf domain intact			Puf1	Puf1		NA	NA	NA	NA	NA	NA	NA			4	4	9;44;46;80;81;116;156;192		130;148	TWQ	NYQ	SRR	STL					TWQNYQSRRSTL	12						NA	NA
S.japonicus.fa__SJAG_05475T0	S.japonicus.fa	SJAG_05475T0	68		Puf3	Puf3		Puf3		S.cerevisiae.fa__YLL013C	N.crassa.fa__NCU06511T0	Puf3	Puf3	Puf3	Puf3	Puf3	Puf3		8	8	501;536;538;573;574;609;610;645;646;680;681;716;717;752;760;795		54;67;69;78;106;121;271;296	SRQ	NYQ	CRQ	NHQ	CRQ	NYQ	SNE	NYQ	SRQNYQCRQNHQCRQNYQSNENYQ	24	Puf3			Puf3		SRQNYQCRQNHQCRQNYQSNENYQ	1
S.japonicus.fa__SJAG_05322T0	S.japonicus.fa	SJAG_05322T0	68				Puf4	Puf4		NA	NA	NA	NA	NA	NA	NA			6	6	565;600;632;667;668;703;704;739;740;775;778;813		2;13;31;50;434;449;458;470	CRQ	NHQ	CCQ	NYQ	SNE	NYQ			CRQNHQCCQNYQSNENYQ	18						NA	NA
S.japonicus.fa__SJAG_02239T0	S.japonicus.fa	SJAG_02239T0	68		Puf4	Puf4		Puf4		S.cerevisiae.fa__YGL014W	N.crassa.fa__NCU11956T0	Puf4	Puf4	Puf4	Puf4	Puf4	Puf4		8	8	212;247;248;283;284;320;321;356;357;392;393;428;429;464;467;502		170;192	CRQ	NYQ	TRQ	NHQ	CCQ	NYQ	SNE	NYQ	CRQNYQTRQNHQCCQNYQSNENYQ	24	Puf4			Puf4		NA	NA
S.japonicus.fa__SJAG_05758T0	S.japonicus.fa	SJAG_05758T0	68		Puf6			Puf6		S.cerevisiae.fa__YDR496C	N.crassa.fa__NCU09380T0	Puf6	Puf6	Puf6	Puf6	Puf6	Puf6		5	5	160;195;196;231;232;268;345;380;381;417		44;99;612;630	SRQ	KYV	AYE	SEM	HLV				SRQKYVAYESEMHLV	15						NA	NA
S.japonicus.fa__SJAG_00759T0	S.japonicus.fa	SJAG_00759T0	68		Puf8	Puf8		Puf8		NA	N.crassa.fa__NCU01760T0	NA	Puf8	NA	Puf8	Puf8	Puf8		7	7	351;386;387;422;423;459;463;498;499;534;535;570;579;614			NFQ	CHQ	CHQ	SLQ	NWQ	SKE	NYQ		NFQCHQCHQSLQNWQSKENYQ	21		Puf8 - missing rep1		Puf8		NA	NA
S.japonicus.fa__SJAG_02036T0	S.japonicus.fa	SJAG_02036T0	68			Puf8	Puf8	Puf8		NA	NA	NA	NA	NA	NA	NA			7	7	268;303;304;339;340;375;380;414;416;451;452;487;496;531			NFQ	CHQ	CHQ	SLQ	NWQ	SKE	NYQ		NFQCHQCHQSLQNWQSKENYQ	21		Puf8 - missing rep1		Puf8		NA	NA
S.cryophilus.fa__SPOG_04822T0	S.cryophilus.fa	SPOG_04822T0	69		Nop9			Nop9		S.cerevisiae.fa__YJL010C	N.crassa.fa__NCU06118T0	Nop9	Nop9	Nop9	Nop9	Nop9	Nop9		8	8	98;133;134;168;198;232;262;297;315;350;351;386;491;528;529;566		3;16	SKE	SYE	VHH	SKQ	SRE	NFQ	SHE	SHD	SKESYEVHHSKQSRENFQSHESHD	24						NA	NA
S.cryophilus.fa__SPOG_04211T0	S.cryophilus.fa	SPOG_04211T0	69	possibly missing C-terminus, RRM/Puf domains intact		Puf1 or Puf2		Puf1		NA	NA	NA	NA	NA	NA	NA			4	4	777;812;813;848;850;884;885;921	597;666	31;54;108;130;183;196;223;241;246;259;282;292;381;392;438;449;487;499;555;569	NTQ	TWQ	NYQ	SRR					NTQTWQNYQSRR	12		Puf1 or Puf2	Puf1 or 2 - has RRM	Puf1 or Puf2		NA	NA
S.cryophilus.fa__SPOG_04487T0	S.cryophilus.fa	SPOG_04487T0	69	possibly missing N-terminus, RRM/Puf domains intact	Puf1	Puf1 or Puf2		Puf1		S.cerevisiae.fa__YJR091C	N.crassa.fa__NCU06199T0	Puf1	Puf1	Puf1	Puf1	Puf1	Puf1		5	5	189;224;225;261;262;296;297;333;372;408	1;70	528;553;585;597	NTQ	TWQ	NYQ	ARR	STF				NTQTWQNYQARRSTF	15		Puf1 or Puf2	Puf1 or 2 - has RRM	Puf1 or Puf2		NA	NA
S.cryophilus.fa__SPOG_00710T0	S.cryophilus.fa	SPOG_00710T0	69		Puf3	Puf3		Puf3		S.cerevisiae.fa__YLL013C	N.crassa.fa__NCU06511T0	Puf3	Puf3	Puf3	Puf3	Puf3	Puf3		8	8	379;414;416;451;452;487;488;523;524;558;559;594;595;630;638;673		46;66;271;286	SRQ	NYQ	CRQ	NHQ	CRQ	NYQ	SNE	NYQ	SRQNYQCRQNHQCRQNYQSNENYQ	24	Puf3			Puf3		SRQNYQCRQNHQCRQNYQSNENYQ	1
S.cryophilus.fa__SPOG_03975T0	S.cryophilus.fa	SPOG_03975T0	69			Puf4	Puf4	Puf4		NA	NA	NA	NA	NA	NA	NA			8	8	474;509;510;545;546;582;583;618;619;654;655;690;691;726;729;764		10;24;43;53;62;86;92;105;130;158;163;186;192;209;218;230;337;352;450;465	CRQ	NYQ	TRQ	NHQ	CCQ	NYQ	SNE	NYQ	CRQNYQTRQNHQCCQNYQSNENYQ	24	Puf4			Puf4		NA	NA
S.cryophilus.fa__SPOG_04810T0	S.cryophilus.fa	SPOG_04810T0	69		Puf4	Puf4		Puf4		S.cerevisiae.fa__YGL014W	N.crassa.fa__NCU11956T0	Puf4	Puf4	Puf4	Puf4	Puf4	Puf4		8	8	357;392;393;428;429;465;466;501;502;537;538;573;574;609;612;647		77;88;104;120;144;156;180;216;260;272;286;307	CRQ	NYQ	TRQ	NHQ	CCQ	NYQ	SNE	NYQ	CRQNYQTRQNHQCCQNYQSNENYQ	24	Puf4			Puf4		NA	NA
S.cryophilus.fa__SPOG_02317T0	S.cryophilus.fa	SPOG_02317T0	69		Puf6			Puf6		S.cerevisiae.fa__YDR496C	N.crassa.fa__NCU09380T0	Puf6	Puf6	Puf6	Puf6	Puf6	Puf6		6	6	153;188;189;224;225;261;338;373;374;410;412;453		52;72	SRQ	KYV	AYE	SQM	HLV	RRL			SRQKYVAYESQMHLVRRL	18						NA	NA
S.cryophilus.fa__SPOG_03444T0	S.cryophilus.fa	SPOG_03444T0	69		Puf8	Puf8		Puf8		NA	N.crassa.fa__NCU01760T0	NA	Puf8	NA	Puf8	Puf8	Puf8		8	8	357;392;393;427;429;464;465;503;505;540;541;576;577;616;621;656		9;24;101;117;147;158;184;202;296;318	SIQ	NFQ	CHQ	CHQ	SLQ	NWQ	SKE	NYQ	SIQNFQCHQCHQSLQNWQSKENYQ	24	Puf8			Puf8		NA	NA
S.cryophilus.fa__SPOG_00226T0	S.cryophilus.fa	SPOG_00226T0	69			Puf8	Puf8	Puf8		NA	NA	NA	NA	NA	NA	NA			7	7	283;318;319;354;355;390;395;430;431;466;467;502;511;546			NFQ	SHQ	CHQ	SLQ	NWQ	SKE	NYQ		NFQSHQCHQSLQNWQSKENYQ	21		Puf8 - missing rep1		Puf8		NA	NA
S.octosporus.fa__SOCG_04875T0	S.octosporus.fa	SOCG_04875T0	70		Nop9			Nop9		S.cerevisiae.fa__YJL010C	N.crassa.fa__NCU06118T0	Nop9	Nop9	Nop9	Nop9	Nop9	Nop9		7	7	98;133;134;168;198;232;262;297;315;350;351;386;529;566			SKE	SYE	VHH	SKQ	SRE	NFQ	SHD		SKESYEVHHSKQSRENFQSHD	21						NA	NA
S.octosporus.fa__SOCG_03527T0	S.octosporus.fa	SOCG_03527T0	70	possibly missing C-terminus, RRM/Puf domains intact		Puf1 or Puf2		Puf1		NA	NA	NA	NA	NA	NA	NA			5	5	759;794;795;830;832;866;867;903;905;940	579;647	4;23;27;54;146;161;217;228;281;295;341;351;450;464;470;482;521;536	NTQ	TWQ	NYQ	SRR	TLN				NTQTWQNYQSRRTLN	15		Puf1 or Puf2	Puf1 or 2 - has RRM	Puf1 or Puf2		NA	NA
S.octosporus.fa__SOCG_06079T0	S.octosporus.fa	SOCG_06079T0	70	possibly missing N-terminus, RRM/Puf domains intact	Puf1	Puf1 or Puf2		Puf1		S.cerevisiae.fa__YJR091C	N.crassa.fa__NCU06199T0	Puf1	Puf1	Puf1	Puf1	Puf1	Puf1		5	5	189;224;225;260;262;296;297;333;372;408	1;70	510;521	NTQ	TWQ	NYQ	ARR	STF				NTQTWQNYQARRSTF	15		Puf1 or Puf2	Puf1 or 2 - has RRM	Puf1 or Puf2		NA	NA
S.octosporus.fa__SOCG_05227T0	S.octosporus.fa	SOCG_05227T0	70		Puf3	Puf3		Puf3		S.cerevisiae.fa__YLL013C	N.crassa.fa__NCU06511T0	Puf3	Puf3	Puf3	Puf3	Puf3	Puf3		8	8	378;413;415;450;451;486;487;522;523;557;558;593;594;629;637;672		47;66	SRQ	NYQ	CRQ	NHQ	CRQ	NYQ	SNE	NYQ	SRQNYQCRQNHQCRQNYQSNENYQ	24	Puf3			Puf3		SRQNYQCRQNHQCRQNYQSNENYQ	1
S.octosporus.fa__SOCG_02036T0	S.octosporus.fa	SOCG_02036T0	70			Puf4	Puf4	Puf4		NA	NA	NA	NA	NA	NA	NA			8	8	461;496;497;532;533;569;570;605;606;641;642;677;678;713;716;751		13;34;49;95;128;148;160;185;194;222;256;268;369;380	CRQ	NYQ	TRQ	NHQ	CCQ	NYQ	SNE	NYQ	CRQNYQTRQNHQCCQNYQSNENYQ	24	Puf4			Puf4		NA	NA
S.octosporus.fa__SOCG_04863T0	S.octosporus.fa	SOCG_04863T0	70		Puf4	Puf4		Puf4		S.cerevisiae.fa__YGL014W	N.crassa.fa__NCU11956T0	Puf4	Puf4	Puf4	Puf4	Puf4	Puf4		8	8	365;400;401;436;437;473;474;509;510;545;546;581;582;617;620;655		58;68;144;161;187;218;294;315	CRQ	NYQ	TRQ	NHQ	CCQ	NYQ	SNE	NYQ	CRQNYQTRQNHQCCQNYQSNENYQ	24	Puf4			Puf4		NA	NA
S.octosporus.fa__SOCG_02723T0	S.octosporus.fa	SOCG_02723T0	70		Puf6			Puf6		S.cerevisiae.fa__YDR496C	N.crassa.fa__NCU09380T0	Puf6	Puf6	Puf6	Puf6	Puf6	Puf6		6	6	162;197;198;233;234;270;347;382;383;419;421;462			SRQ	KYV	AYE	SQM	HLV	RRL			SRQKYVAYESQMHLVRRL	18						NA	NA
S.octosporus.fa__SOCG_03793T0	S.octosporus.fa	SOCG_03793T0	70		Puf8	Puf8		Puf8		NA	N.crassa.fa__NCU01760T0	NA	Puf8	NA	Puf8	Puf8	Puf8		8	8	357;392;393;428;429;464;465;503;505;540;541;576;577;616;621;656		165;192;292;314	SIQ	NFQ	CHQ	CHQ	SLQ	NWQ	SKE	NYQ	SIQNFQCHQCHQSLQNWQSKENYQ	24	Puf8			Puf8		NA	NA
S.octosporus.fa__SOCG_04314T0	S.octosporus.fa	SOCG_04314T0	70			Puf8	Puf8	Puf8		NA	NA	NA	NA	NA	NA	NA			7	7	278;313;314;349;350;385;390;425;426;461;462;497;506;541			NFQ	SHQ	CHQ	SLQ	NWQ	SKE	NYQ		NFQSHQCHQSLQNWQSKENYQ	21		Puf8 - missing rep1		Puf8		NA	NA
S.pombe.fa__SPAC6G9.02c_T0	S.pombe.fa	SPAC6G9.02c_T0	71		Nop9			Nop9		S.cerevisiae.fa__YJL010C	N.crassa.fa__NCU06118T0	Nop9	Nop9	Nop9	Nop9	Nop9	Nop9		7	7	96;131;132;167;261;296;314;349;350;385;491;528;529;566			SKE	SYE	SQR	SRE	NFQ	SHE	SHD		SKESYESQRSRENFQSHESHD	21						NA	NA
S.pombe.fa__SPBP35G2.14_T0	S.pombe.fa	SPBP35G2.14_T0	71		Puf1	Puf1 or Puf2		Puf1		NA	N.crassa.fa__NCU06199T0	NA	Puf1	NA	NA	NA	Puf1		5	5	773;808;809;844;846;880;881;917;919;954	593;661	59;78;119;133;152;157;190;225;236;246;286;303;324;339;361;372;468;492;559;573;662;677	NTQ	TWQ	NYQ	SRR	TLT				NTQTWQNYQSRRTLT	15		Puf1 or Puf2	Puf1 or 2 - has RRM	Puf1 or Puf2		NA	NA
S.pombe.fa__SPBC56F2.08c_T0	S.pombe.fa	SPBC56F2.08c_T0	71	possibly missing N-terminus, RRM/Puf domains intact	Puf1	Puf1 or Puf2		Puf1		S.cerevisiae.fa__YJR091C	NA	Puf1	NA	NA	NA	NA	Puf1		5	5	191;226;227;263;264;298;299;335;374;410	1;70	84;95;482;507;511;527;582;598	NTQ	TWQ	NYQ	ARR	STF				NTQTWQNYQARRSTF	15		Puf1 or Puf2	Puf1 or 2 - has RRM	Puf1 or Puf2		NA	NA
S.pombe.fa__SPAC1687.22c_T0	S.pombe.fa	SPAC1687.22c_T0	71		Puf3	Puf3		Puf3		S.cerevisiae.fa__YLL013C	N.crassa.fa__NCU06511T0	Puf3	Puf3	Puf3	Puf3	Puf3	Puf3		8	8	396;431;433;468;469;504;505;540;541;575;576;611;612;647;655;690		41;62;154;168;249;262	SRQ	NYQ	CRQ	NHQ	CRQ	NYQ	SNE	NYQ	SRQNYQCRQNHQCRQNYQSNENYQ	24	Puf3			Puf3		SRQNYQCRQNHQCRQNYQSNENYQ	1
S.pombe.fa__SPAC4G8.03c_T0	S.pombe.fa	SPAC4G8.03c_T0	71			Puf4	Puf4	Puf4		NA	NA	NA	NA	NA	NA	NA			8	8	462;497;498;533;534;570;571;606;607;642;643;678;679;714;717;752		40;51;134;145;311;324;392;405;438;456	CRQ	NYQ	TRQ	THQ	CCQ	NYQ	SNE	NYQ	CRQNYQTRQTHQCCQNYQSNENYQ	24		Puf4 - 1 a.a. different		Puf4		NA	NA
S.pombe.fa__SPAC6G9.14_T0	S.pombe.fa	SPAC6G9.14_T0	71		Puf4	Puf4		Puf4		S.cerevisiae.fa__YGL014W	N.crassa.fa__NCU11956T0	Puf4	Puf4	Puf4	Puf4	Puf4	Puf4		8	8	343;378;379;414;415;451;452;487;488;523;524;559;560;595;598;633		56;67;109;123;131;152;187;210;223;238;270;286	CRQ	NYQ	TRQ	NHQ	CCQ	NYQ	SNE	NYQ	CRQNYQTRQNHQCCQNYQSNENYQ	24	Puf4			Puf4		NA	NA
S.pombe.fa__SPCP1E11.11_T0	S.pombe.fa	SPCP1E11.11_T0	71		Puf6			Puf6		S.cerevisiae.fa__YDR496C	N.crassa.fa__NCU09380T0	Puf6	Puf6	Puf6	Puf6	Puf6	Puf6		5	5	161;196;197;232;233;268;346;381;382;418		29;55	SRQ	KYI	AYE	SQM	HLV				SRQKYIAYESQMHLV	15						NA	NA
S.pombe.fa__SPCC1682.08c_T0	S.pombe.fa	SPCC1682.08c_T0	71		Puf8	Puf8		Puf8		NA	N.crassa.fa__NCU01760T0	NA	Puf8	NA	Puf8	Puf8	Puf8		8	8	362;396;397;432;433;468;469;507;509;544;545;580;581;620;625;660		24;39;150;163;182;199;281;297;300;311	IFQ	NFQ	CHQ	CHQ	SLQ	NWQ	SKE	NYQ	IFQNFQCHQCHQSLQNWQSKENYQ	24		Puf8 - 2 a.a. different		Puf8		NA	NA
S.pombe.fa__SPAC4G9.05_T0	S.pombe.fa	SPAC4G9.05_T0	71			Puf8	Puf8	Puf8		NA	NA	NA	NA	NA	NA	NA			7	7	291;326;327;362;363;398;403;438;439;474;475;510;519;554		267;277	NFQ	SHQ	CHQ	SLQ	NWQ	SKE	NYQ		NFQSHQCHQSLQNWQSKENYQ	21		Puf8 - missing rep1		Puf8		NA	NA
C.neoformans.fa__CNAG_01827T0	C.neoformans.fa	CNAG_01827T0	72				?	?		NA	NA	NA	NA	NA	NA	NA			4	4	248;283;284;319;332;369;370;407		136;148	NYQ	THC	GSV	HFT					NYQTHCGSVHFT	12						NA	NA
C.neoformans.fa__CNAG_01755T0	C.neoformans.fa	CNAG_01755T0	72		Nop9			Nop9		S.cerevisiae.fa__YJL010C	N.crassa.fa__NCU06118T0	Nop9	Nop9	Nop9	Nop9	Nop9	Nop9		5	0	125;161;189;224;382;417;566;603;604;639		181;191;205;223;511;523;558;572;596;610;703;716	SHQ	SPR	NFA	SHD	SRD				SHQSPRNFASHDSRD	15						NA	NA
C.neoformans.fa__CNAG_01360T0	C.neoformans.fa	CNAG_01360T0	72		Puf1	Puf1 or Puf2		Puf1		S.cerevisiae.fa__YJR091C	N.crassa.fa__NCU06199T0	Puf1	Puf1	Puf1	Puf1	Puf1	Puf1		6	6	815;850;851;887;923;959;961;996;998;1034;1041;1078	429;495;583;653	26;41;102;117;213;224;382;404;768;780;1242;1265	NTQ	TWQ	ARR	ALT	SLL	NQG			NTQTWQARRALTSLLNQG	18			Puf1 or 2 - has RRM	Puf1 or Puf2		NA	NA
C.neoformans.fa__CNAG_04003T0	C.neoformans.fa	CNAG_04003T0	72		Puf3	Puf3		Puf3		S.cerevisiae.fa__YLL013C	N.crassa.fa__NCU06511T0	Puf3	Puf3	Puf3	Puf3	Puf3	Puf3		7	7	221;256;257;292;293;328;329;361;362;397;398;433;434;469		49;64;508;521;551;564;585;598	SRQ	NYQ	CRQ	NHQ	CRQ	NYQ	SNE		SRQNYQCRQNHQCRQNYQSNE	21		Puf3 - missing rep8		Puf3		SRQNYQCRQNHQCRQNYQSNENFQ	0
C.neoformans.fa__CNAG_02810T0	C.neoformans.fa	CNAG_02810T0	72		Puf4	Puf4		Puf4		S.cerevisiae.fa__YGL014W	N.crassa.fa__NCU11956T0	Puf4	Puf4	Puf4	Puf4	Puf4	Puf4		8	8	446;481;482;517;518;554;558;593;594;629;630;665;666;701;704;739		215;228;312;330;380;401;411;425;771;801;827;844;909;930	CRQ	NYQ	TRQ	NHQ	CCQ	NYQ	SNE	NYQ	CRQNYQTRQNHQCCQNYQSNENYQ	24	Puf4			Puf4		NA	NA
C.neoformans.fa__CNAG_03675T0	C.neoformans.fa	CNAG_03675T0	72		Puf6			Puf6		S.cerevisiae.fa__YDR496C	N.crassa.fa__NCU09380T0	Puf6	Puf6	Puf6	Puf6	Puf6	Puf6		4	0	165;200;201;235;365;400;439;475		26;58;552;568	GRQ	KFS	SAR	RRF					GRQKFSSARRRF	12						NA	NA
C.cinerea.fa__CC1G_08217T0	C.cinerea.fa	CC1G_08217T0	73		Nop9			Nop9		S.cerevisiae.fa__YJL010C	N.crassa.fa__NCU06118T0	Nop9	Nop9	Nop9	Nop9	Nop9	Nop9		5	5	147;181;209;245;357;392;394;429;595;630		3;19;89;100;705;717;749;762	SHQ	SHR	SHE	NFA	SRD				SHQSHRSHENFASRD	15						NA	NA
C.cinerea.fa__CC1G_13963T0	C.cinerea.fa	CC1G_13963T0	73		Puf1	Puf1		Puf1		S.cerevisiae.fa__YJR091C	N.crassa.fa__NCU06199T0	Puf1	Puf1	Puf1	Puf1	Puf1	Puf1		6	6	822;857;858;894;895;929;930;967;968;1003;1005;1041	466;539;589;659	22;31;47;58;116;135;159;172;195;216;306;318;564;576;1163;1176;1184;1196;1267;1278	NTQ	TWQ	NYQ	ARR	ALT	SLL			NTQTWQNYQARRALTSLL	18	Puf1		Puf1 or 2 - has RRM	Puf1		NA	NA
C.cinerea.fa__CC1G_04231T0	C.cinerea.fa	CC1G_04231T0	73		Puf3	Puf3		Puf3		S.cerevisiae.fa__YLL013C	N.crassa.fa__NCU06511T0	Puf3	Puf3	Puf3	Puf3	Puf3	Puf3		8	8	115;150;152;187;188;223;224;258;259;294;295;330;331;366;374;409		8;34	SRQ	NYQ	CWQ	NHQ	CRQ	NYQ	SNE	NYQ	SRQNYQCWQNHQCRQNYQSNENYQ	24		Puf3 - 1 a.a. different		Puf3		SRQNYQCWQNHQCRQNYQSNENYQ	0
C.cinerea.fa__CC1G_03740T0	C.cinerea.fa	CC1G_03740T0	73		Puf4	Puf4		Puf4		S.cerevisiae.fa__YGL014W	N.crassa.fa__NCU11956T0	Puf4	Puf4	Puf4	Puf4	Puf4	Puf4		8	8	560;595;596;631;632;668;669;704;705;740;741;776;777;812;815;850		480;490;499;511;518;531;914;928	CRQ	NYQ	TRQ	NHQ	CCQ	NYQ	SNE	NYQ	CRQNYQTRQNHQCCQNYQSNENYQ	24	Puf4			Puf4		NA	NA
C.cinerea.fa__CC1G_05830T0	C.cinerea.fa	CC1G_05830T0	73		Puf6			Puf6		S.cerevisiae.fa__YDR496C	N.crassa.fa__NCU09380T0	Puf6	Puf6	Puf6	Puf6	Puf6	Puf6		5	5	151;186;187;221;222;258;355;390;391;428		51;82;341;354;530;540;659;669	SRQ	KFT	TSA	SRR	QLF				SRQKFTTSASRRQLF	15						NA	NA
C.cinerea.fa__CC1G_00697T0	C.cinerea.fa	CC1G_00697T0	73		Puf8			Puf8		NA	N.crassa.fa__NCU01760T0	NA	Puf8	NA	Puf8	Puf8	Puf8		5	5	396;432;433;467;509;544;549;584;585;620		95;105;238;247	NWQ	CHQ	SLQ	SYQ	SKT				NWQCHQSLQSYQSKT	15						NA	NA
L.bicolor.fa__LACBIDRAFT_303745	L.bicolor.fa	LACBIDRAFT_303745	74		Nop9			Nop9		S.cerevisiae.fa__YJL010C	N.crassa.fa__NCU06118T0	Nop9	Nop9	Nop9	Nop9	Nop9	Nop9		4	4	148;182;210;245;401;436;605;640		79;101;488;500;696;715;737;755;771;782	SHQ	SHR	NFA	SRD					SHQSHRNFASRD	12						NA	NA
L.bicolor.fa__LACBIDRAFT_155850	L.bicolor.fa	LACBIDRAFT_155850	74		Puf1 or Puf2	Puf1 or Puf2		Puf1		S.cerevisiae.fa__YPR042C	N.crassa.fa__NCU06199T0	Puf2	Puf1	not the same	not the same	not the same	Puf1 or Puf2		6	6	760;795;796;832;833;867;868;905;906;941;943;979	393;466;518;588	24;35;99;109;119;129;261;276;480;495	NTQ	TWQ	NYQ	ARR	ALN	SLL			NTQTWQNYQARRALNSLL	18			Puf1 or 2 - has RRM	Puf1 or Puf2		NA	NA
L.bicolor.fa__LACBIDRAFT_244636	L.bicolor.fa	LACBIDRAFT_244636	74		Puf3	Puf3		Puf3		S.cerevisiae.fa__YLL013C	N.crassa.fa__NCU06511T0	Puf3	Puf3	Puf3	Puf3	Puf3	Puf3		8	8	47;82;84;119;120;155;156;190;191;226;227;262;263;298;306;341		353;368	SRQ	NYQ	CRQ	NHQ	CRQ	NYQ	SNE	NYQ	SRQNYQCRQNHQCRQNYQSNENYQ	24	Puf3			Puf3		SRQNYQCRQNHQCRQNYQSNENYQ	1
L.bicolor.fa__LACBIDRAFT_317976	L.bicolor.fa	LACBIDRAFT_317976	74		Puf6			Puf6		S.cerevisiae.fa__YDR496C	N.crassa.fa__NCU09380T0	Puf6	Puf6	Puf6	Puf6	Puf6	Puf6		4	4	152;187;188;222;223;259;356;391		62;83;542;555;647;664	SRQ	KFT	TSA	SRR					SRQKFTTSASRR	12						NA	NA
L.bicolor.fa__LACBIDRAFT_321144	L.bicolor.fa	LACBIDRAFT_321144	74		Puf8			Puf8		NA	N.crassa.fa__NCU01760T0	NA	Puf8	NA	Puf8	Puf8	Puf8		6	6	352;389;390;426;427;461;503;538;543;578;579;614		143;160;228;243;255;270;319;335	QAF	NWQ	CHQ	SLQ	SYQ	AKT			QAFNWQCHQSLQSYQAKT	18						NA	NA
U.maydis.fa__UM02932	U.maydis.fa	UM02932	75				?	?		NA	NA	NA	NA	NA	NA	NA			6	6	1671;1706;1707;1743;1796;1833;1959;1995;1997;2032;2294;2329		153;164;862;868;1437;1449;1526;1535;1647;1665;1760;1772;1868;1881;2089;2099;2148;2160;2190;2216;2221;2236;2366;2375;2401;2417	SLE	SHQ	SHR	ASL	NHA	SRD			SLESHQSHRASLNHASRD	18						NA	NA
U.maydis.fa__UM00268	U.maydis.fa	UM00268	75		Puf1	Puf1 or Puf2		Puf1		S.cerevisiae.fa__YJR091C	N.crassa.fa__NCU06199T0	Puf1	Puf1	Puf1	Puf1	Puf1	Puf1		6	6	942;977;978;1013;1015;1049;1050;1087;1088;1123;1125;1161	543;608;665;732	10;35;73;87;324;339;363;388;492;505;517;531;760;777;1317;1336;1376;1385;1652;1669;1750;1761;1832;1852;1890;1899	NTQ	TWQ	NYQ	SRR	TLT	SQL			NTQTWQNYQSRRTLTSQL	18		Puf1 or Puf2	Puf1 or 2 - has RRM	Puf1 or Puf2		NA	NA
U.maydis.fa__UM03431	U.maydis.fa	UM03431	75		Puf3 or Puf4	Puf4	Puf4	Puf4		S.cerevisiae.fa__YGL014W	N.crassa.fa__NCU06511T0	Puf4	Puf3	not the same	not the same	not the same	Puf3 or Puf4		8	8	540;575;576;611;612;648;649;684;685;720;721;756;757;792;795;830		116;129;191;202;263;309;354;368;399;423;455;469;506;518;869;922;940;957;958;970;981;1020	CRQ	NYQ	TRQ	NHQ	CCQ	NYQ	SNE	NYQ	CRQNYQTRQNHQCCQNYQSNENYQ	24	Puf4			Puf4		NA	NA
U.maydis.fa__UM05467	U.maydis.fa	UM05467	75		Puf8			Puf8		NA	N.crassa.fa__NCU01760T0	NA	Puf8	NA	Puf8	Puf8	Puf8		7	7	419;457;458;488;489;523;525;562;567;602;603;638;682;717		160;172;178;191	QEL	NFQ	CHQ	IHQ	SIQ	VWQ	IQT		QELNFQCHQIHQSIQVWQIQT	21						NA	NA
P.graminis.fa__PGTT_08725	P.graminis.fa	PGTT_08725	76				?	?		NA	NA	NA	NA	NA	NA	NA			3	3	82;117;118;153;156;189		39;57	SLQ	NFL	AKE						SLQNFLAKE	9						NA	NA
P.graminis.fa__PGTT_15488	P.graminis.fa	PGTT_15488	76		Nop9			Nop9		S.cerevisiae.fa__YJL010C	N.crassa.fa__NCU06118T0	Nop9	Nop9	Nop9	Nop9	Nop9	Nop9		6	6	130;165;166;200;385;421;423;458;581;617;619;654		110;119;286;307;347;358;671;682	SIE	SHQ	ASI	NFS	SRD	SHE			SIESHQASINFSSRDSHE	18						NA	NA
P.graminis.fa__PGTT_08592	P.graminis.fa	PGTT_08592	76		Puf1	Puf1 or Puf2		Puf1		S.cerevisiae.fa__YJR091C	N.crassa.fa__NCU06199T0	Puf1	Puf1	Puf1	Puf1	Puf1	Puf1		6	6	929;964;965;1001;1002;1036;1037;1074;1075;1110;1112;1147	479;553;642;709	6;31;37;68;72;93;265;275;388;399;432;452;735;743;875;886;1219;1237;1267;1277;1296;1313;1326;1332	NTQ	TWQ	NYQ	ARR	TLT	SVL			NTQTWQNYQARRTLTSVL	18		Puf1 or Puf2	Puf1 or 2 - has RRM	Puf1 or Puf2		NA	NA
P.graminis.fa__PGTT_01885	P.graminis.fa	PGTT_01885	76		Puf3	Puf3		Puf3		S.cerevisiae.fa__YLL013C	N.crassa.fa__NCU06511T0	Puf3	Puf3	Puf3	Puf3	Puf3	Puf3		8	8	444;479;480;515;516;551;552;586;588;623;624;659;660;695;702;738		287;322;775;799	SRQ	NYQ	CRQ	NHQ	CRQ	NYQ	SNE	ANL	SRQNYQCRQNHQCRQNYQSNEANL	24		Puf3 - rep8 different		Puf3		SRQNYQCRQNHQCRQNYQSNENFQ	0
R.oryzae.fa__RO3T_14885	R.oryzae.fa	RO3T_14885	77		Nop9			Nop9		S.cerevisiae.fa__YJL010C	N.crassa.fa__NCU06118T0	Nop9	Nop9	Nop9	Nop9	Nop9	Nop9		6	6	92;127;128;162;272;312;330;366;367;403;551;586		6;21;32;42;239;252	SLE	SHQ	NPQ	SHE	NFQ	SHE			SLESHQNPQSHENFQSHE	18						NA	NA
R.oryzae.fa__RO3T_06535	R.oryzae.fa	RO3T_06535	77			Puf1 or Puf2		Puf1		NA	NA	NA	NA	NA	NA	NA			6	6	541;570;571;607;608;642;643;679;681;716;718;753	259;329;352;422	129;147;444;454	LFC	TWQ	NYQ	ARR	ALI	SLL			LFCTWQNYQARRALISLL	18			Puf1 or 2 - has RRM	Puf1 or Puf2		NA	NA
R.oryzae.fa__RO3T_06036	R.oryzae.fa	RO3T_06036	77			Puf1 or Puf2		Puf1		NA	NA	NA	NA	NA	NA	NA			6	6	599;634;635;670;672;707;708;743;746;781;783;819	312;382;401;471	221;228;482;500	NTQ	TWQ	NYQ	ARR	ALS	SQY			NTQTWQNYQARRALSSQY	18			Puf1 or 2 - has RRM	Puf1 or Puf2		NA	NA
R.oryzae.fa__RO3T_05730	R.oryzae.fa	RO3T_05730	77	possibly missing C-terminus, Puf domain truncated, RRM intact		Puf1 or Puf2		Puf1		NA	NA	NA	NA	NA	NA	NA			5	5	468;500;501;536;538;571;572;607;647;682	180;250;271;341	154;166;367;383	VQF	TWQ	NYQ	ARR	STQ				VQFTWQNYQARRSTQ	15			Puf1 or 2 - has RRM	Puf1 or Puf2		NA	NA
R.oryzae.fa__RO3T_07265	R.oryzae.fa	RO3T_07265	77		Puf1	Puf1 or Puf2		Puf1		S.cerevisiae.fa__YJR091C	N.crassa.fa__NCU06199T0	Puf1	Puf1	Puf1	Puf1	Puf1	Puf1		6	6	467;502;503;539;540;574;575;611;613;648;650;685	227;297	12;23;321;332;370;389;809;837	NTQ	TWQ	NYQ	ARR	ALI	SLL			NTQTWQNYQARRALISLL	18			Puf1 or 2 - has RRM	Puf1 or Puf2		NA	NA
R.oryzae.fa__RO3T_01692	R.oryzae.fa	RO3T_01692	77			Puf3	Puf3	Puf3		NA	NA	NA	NA	NA	NA	NA			7	7	487;522;523;558;559;594;595;630;631;666;667;702;703;738		201;215;359;370;404;436;449;461	SRQ	NYQ	CRQ	NHQ	CRQ	NYQ	SNE		SRQNYQCRQNHQCRQNYQSNE	21		Puf3 - missing rep8		Puf3		SRQNYQCRQNHQCRQNYQSNE---	0
R.oryzae.fa__RO3T_04979	R.oryzae.fa	RO3T_04979	77		Puf3	Puf3		Puf3		NA	N.crassa.fa__NCU06511T0	NA	Puf3	NA	NA	NA	Puf3		8	8	488;523;524;559;560;595;596;631;632;667;668;703;704;739;747;782		162;181;368;377	SRQ	NYQ	CRQ	NHQ	CRQ	NYQ	SNE	NYQ	SRQNYQCRQNHQCRQNYQSNENYQ	24	Puf3			Puf3		SRQNYQCRQNHQCRQNYQSNENYQ	1
R.oryzae.fa__RO3T_01914	R.oryzae.fa	RO3T_01914	77			Puf3	Puf3	Puf3		NA	NA	NA	NA	NA	NA	NA			8	8	326;361;362;397;398;433;434;469;470;505;506;541;542;577;585;620		102;114;151;161;189;207;228;237;240;294	SRQ	NYQ	CRQ	NHQ	CRQ	NYQ	SNE	NYQ	SRQNYQCRQNHQCRQNYQSNENYQ	24	Puf3			Puf3		SRQNYQCRQNHQCRQNYQSNENYQ	1
R.oryzae.fa__RO3T_09835	R.oryzae.fa	RO3T_09835	77		Puf3	Puf3		Puf3		S.cerevisiae.fa__YLL013C	NA	Puf3	NA	NA	NA	NA	Puf3		8	8	331;366;367;402;403;438;439;474;475;510;511;546;547;582;590;625		10;23;177;192	SRQ	NYQ	CRQ	NHQ	CRQ	NYQ	SNE	NYQ	SRQNYQCRQNHQCRQNYQSNENYQ	24	Puf3			Puf3		SRQNYQCRQNHQCRQNYQSNENYQ	1
R.oryzae.fa__RO3T_17012	R.oryzae.fa	RO3T_17012	77	possibly missing N-terminus, Puf domain truncated		Puf4	Puf4	Puf4		NA	NA	NA	NA	NA	NA	NA			6	6	5;30;31;67;68;103;105;140;141;176;177;213			CTQ	TRQ	NHQ	CCQ	NYQ	SNE			CTQTRQNHQCCQNYQSNE	18		Puf4 - missing rep2 and rep8, 1 a.a. different		Puf4		NA	NA
R.oryzae.fa__RO3T_06328	R.oryzae.fa	RO3T_06328	77				Puf4	Puf4		NA	NA	NA	NA	NA	NA	NA			6	6	235;270;291;326;327;362;363;398;399;434;437;472		198;210	CRQ	NHQ	CCQ	NYQ	SNE	NYQ			CRQNHQCCQNYQSNENYQ	18						NA	NA
R.oryzae.fa__RO3T_10006	R.oryzae.fa	RO3T_10006	77		Puf4	Puf4		Puf4		S.cerevisiae.fa__YGL014W	N.crassa.fa__NCU11956T0	Puf4	Puf4	Puf4	Puf4	Puf4	Puf4		7	7	98;133;138;174;175;210;211;246;247;282;283;318;321;356		58;73;380;387;389;401	CRQ	TRQ	NHQ	CCQ	NYQ	SNE	NYQ		CRQTRQNHQCCQNYQSNENYQ	21		Puf4 - missing rep2		Puf4		NA	NA
R.oryzae.fa__RO3T_09461	R.oryzae.fa	RO3T_09461	77		Puf6			Puf6		S.cerevisiae.fa__YDR496C	N.crassa.fa__NCU09380T0	Puf6	Puf6	Puf6	Puf6	Puf6	Puf6		6	6	75;110;111;145;146;182;259;294;295;331;444;480			SRQ	KFM	SSE	AWM	YLL	NRK			SRQKFMSSEAWMYLLNRK	18						NA	NA
A.macrogynus.fa__AMAG_10795T0	A.macrogynus.fa	AMAG_10795T0	78		Nop9			Nop9		NA	N.crassa.fa__NCU06118T0	NA	Nop9	NA	NA	NA	Nop9		6	0	170;205;206;242;264;300;392;427;429;465;653;688		2;33;50;68;71;81;86;111;533;547;558;571;758;779;829;869	SVE	SHQ	TFR	SRE	NFQ	SHD			SVESHQTFRSRENFQSHD	18						NA	NA
A.macrogynus.fa__AMAG_00236T0	A.macrogynus.fa	AMAG_00236T0	78		Nop9			Nop9		S.cerevisiae.fa__YJL010C	NA	Nop9	NA	NA	NA	NA	Nop9		6	0	173;208;209;245;267;303;395;430;432;468;655;690		3;31;32;51;65;88;534;553;560;580;763;776;831;859;861;871	SVE	SHQ	TFR	SRE	NFQ	SHD			SVESHQTFRSRENFQSHD	18						NA	NA
A.macrogynus.fa__AMAG_01098T0	A.macrogynus.fa	AMAG_01098T0	78			Puf1 or Puf2		Puf1		NA	NA	NA	NA	NA	NA	NA			4	4	1051;1086;1087;1122;1135;1168;1214;1249	684;752;800;867	2;22;27;50;73;99;118;171;175;197;206;227;359;376;400;417;490;511;523;538;597;613;625;678;778;792;885;896;916;931;947;961;1015;1038;1185;1196;1360;1378;1385;1409	NTQ	TWQ	NYQ	SLQ					NTQTWQNYQSLQ	12		Puf1 or Puf2	Puf1 or 2 - has RRM	Puf1 or Puf2		NA	NA
A.macrogynus.fa__AMAG_05281T0	A.macrogynus.fa	AMAG_05281T0	78		Puf1	Puf1 or Puf2		Puf1		S.cerevisiae.fa__YJR091C	N.crassa.fa__NCU06199T0	Puf1	Puf1	Puf1	Puf1	Puf1	Puf1		5	5	1071;1106;1107;1142;1155;1188;1234;1269;1271;1307	694;762;810;877	2;72;77;106;127;180;184;195;215;238;274;295;406;417;500;517;608;623;635;668;671;688;895;906;967;981;992;1007;1035;1058;1205;1216;1361;1376;1383;1398;1414;1434	NTQ	TWQ	NYQ	SLQ	SAY				NTQTWQNYQSLQSAY	15		Puf1 or Puf2	Puf1 or 2 - has RRM	Puf1 or Puf2		NA	NA
A.macrogynus.fa__AMAG_03718T0	A.macrogynus.fa	AMAG_03718T0	78			Puf3	Puf3	Puf3		NA	NA	NA	NA	NA	NA	NA			6	6	483;518;519;554;555;590;591;626;627;662;663;699		112;129;132;140;204;213;270;293;327;355;388;423;435;462	SRQ	NYQ	CRQ	NHQ	CRQ	NYQ			SRQNYQCRQNHQCRQNYQ	18		Puf3 - missing rep7-8		Puf3		SRQNYQCRQNHQCRQNYQK-E---	0
A.macrogynus.fa__AMAG_06862T0	A.macrogynus.fa	AMAG_06862T0	78		Puf3	Puf3		Puf3		S.cerevisiae.fa__YLL013C	N.crassa.fa__NCU06511T0	Puf3	Puf3	Puf3	Puf3	Puf3	Puf3		8	8	825;860;861;896;897;932;933;968;969;1004;1005;1040;1041;1076;1081;1116		4;25;26;61;149;160;205;262;276;288;292;303;392;404;467;475;539;548;565;596;609;637;675;705;728;766;784;808;1143;1159	SRQ	NYQ	CRQ	NHQ	CRQ	NYQ	SNE	NYQ	SRQNYQCRQNHQCRQNYQSNENYQ	24	Puf3			Puf3		SRQNYQCRQNHQCRQNYQSNENYQ	1
A.macrogynus.fa__AMAG_04069T0	A.macrogynus.fa	AMAG_04069T0	78		Puf4	Puf4		Puf4		NA	N.crassa.fa__NCU11956T0	NA	Puf4	NA	NA	NA	Puf4		8	8	745;780;781;816;817;853;854;889;890;925;926;961;962;999;1003;1038		47;52;63;75;100;130;134;149;191;219;500;511;533;547;555;569;652;681;689;730	CRQ	NYQ	TRQ	NHQ	CCQ	NYQ	SNE	NYQ	CRQNYQTRQNHQCCQNYQSNENYQ	24	Puf4			Puf4		NA	NA
A.macrogynus.fa__AMAG_01572T0	A.macrogynus.fa	AMAG_01572T0	78		Puf4	Puf4		Puf4		S.cerevisiae.fa__YGL014W	NA	Puf4	NA	NA	NA	NA	Puf4		8	8	727;762;763;798;799;835;836;871;872;907;908;943;944;981;985;1020		37;59;96;121;126;141;189;213;220;231;374;396;516;529;568;583;589;599;637;666;677;712	CRQ	NYQ	TRQ	NHQ	CCQ	NYQ	SNE	NYQ	CRQNYQTRQNHQCCQNYQSNENYQ	24	Puf4			Puf4		NA	NA
A.macrogynus.fa__AMAG_09874T0	A.macrogynus.fa	AMAG_09874T0	78				Puf6	Puf6		NA	NA	NA	NA	NA	NA	NA			5	5	175;210;211;245;246;282;355;390;391;428		34;61;75;109;524;536	SRQ	RFL	CYE	ALM	HWL				SRQRFLCYEALMHWL	15						NA	NA
A.macrogynus.fa__AMAG_07634T0	A.macrogynus.fa	AMAG_07634T0	78		Puf6			Puf6		S.cerevisiae.fa__YDR496C	N.crassa.fa__NCU09380T0	Puf6	Puf6	Puf6	Puf6	Puf6	Puf6		5	5	175;210;211;245;246;282;355;390;391;428		76;86	SRQ	RFL	CYE	ALM	HWL				SRQRFLCYEALMHWL	15						NA	NA
B.dendrobatidis.fa__BDET_08309	B.dendrobatidis.fa	BDET_08309	79		Nop9			Nop9		S.cerevisiae.fa__YJL010C	N.crassa.fa__NCU06118T0	Nop9	Nop9	Nop9	Nop9	Nop9	Nop9		7	7	116;151;152;186;225;260;344;379;381;417;521;558;559;594		19;30;649;659;678;692	SRE	SHQ	SHQ	SHE	NFQ	SRE	SHD		SRESHQSHQSHENFQSRESHD	21						NA	NA
B.dendrobatidis.fa__BDET_01261	B.dendrobatidis.fa	BDET_01261	79		Puf1	Puf1 or Puf2		Puf1		S.cerevisiae.fa__YJR091C	N.crassa.fa__NCU06199T0	Puf1	Puf1	Puf1	Puf1	Puf1	Puf1		3	3	734;769;770;806;807;841	433;500;519;586	38;50;103;115;229;247;315;325;661;670;1062;1073;1112;1128;1195;1216	NIQ	TWQ	NYQ						NIQTWQNYQ	9			Puf1 or 2 - has RRM	Puf1 or Puf2		NA	NA
B.dendrobatidis.fa__BDET_01841	B.dendrobatidis.fa	BDET_01841	79		Puf3	Puf3		Puf3		S.cerevisiae.fa__YLL013C	N.crassa.fa__NCU06511T0	Puf3	Puf3	Puf3	Puf3	Puf3	Puf3		8	8	543;578;579;614;615;650;651;686;687;722;723;758;759;794;802;837		80;109;452;463	SRQ	NYQ	CRQ	NHQ	CRQ	NYQ	SNE	NYQ	SRQNYQCRQNHQCRQNYQSNENYQ	24	Puf3			Puf3		SRQNYQCRQNHQCRQNYQSNENYQ	1
B.dendrobatidis.fa__BDET_07644	B.dendrobatidis.fa	BDET_07644	79		Puf4	Puf4		Puf4		S.cerevisiae.fa__YGL014W	N.crassa.fa__NCU11956T0	Puf4	Puf4	Puf4	Puf4	Puf4	Puf4		8	8	513;548;549;584;585;621;622;657;658;693;694;729;730;765;768;803		265;282;450;467	CRQ	NYQ	TRQ	NHQ	CCQ	NYQ	SNE	NYQ	CRQNYQTRQNHQCCQNYQSNENYQ	24	Puf4			Puf4		NA	NA
B.dendrobatidis.fa__BDET_04102	B.dendrobatidis.fa	BDET_04102	79		Puf6			Puf6		S.cerevisiae.fa__YDR496C	N.crassa.fa__NCU09380T0	Puf6	Puf6	Puf6	Puf6	Puf6	Puf6		6	6	127;162;163;198;199;235;315;350;351;389;415;450		20;32;61;72;105;120	SRQ	RFS	SLD	ARQ	HTL	SRL			SRQRFSSLDARQHTLSRL	18						NA	NA
B.dendrobatidis.fa__BDET_08190	B.dendrobatidis.fa	BDET_08190	79		Puf8			Puf8		NA	N.crassa.fa__NCU01760T0	NA	Puf8	NA	Puf8	Puf8	Puf8		8	8	350;387;388;423;424;459;460;495;500;535;536;571;572;607;617;652		328;343	PSY	NFQ	CHQ	CHQ	SLQ	NWQ	SKE	NYQ	PSYNFQCHQCHQSLQNWQSKENYQ	24						NA	NA
S.punctatus.fa__SPPG_07093T0	S.punctatus.fa	SPPG_07093T0	80		Nop9			Nop9		S.cerevisiae.fa__YJL010C	N.crassa.fa__NCU06118T0	Nop9	Nop9	Nop9	Nop9	Nop9	Nop9		2	1	199;233;363;398		7;24;48;63;68;79;513;529;576;592;616;637	SHQ	SHD							SHQSHD	6						NA	NA
S.punctatus.fa__SPPG_04340T0	S.punctatus.fa	SPPG_04340T0	80		Puf1	Puf1 or Puf2		Puf1		S.cerevisiae.fa__YJR091C	N.crassa.fa__NCU06199T0	Puf1	Puf1	Puf1	Puf1	Puf1	Puf1		5	5	636;671;672;708;709;743;789;825;831;868	293;360;378;445	59;74;492;503;523;529;898;917;959;968;1048;1066	NVQ	TWQ	NYQ	SAL	VSQ				NVQTWQNYQSALVSQ	15		Puf1 or Puf2	Puf1 or 2 - has RRM	Puf1 or Puf2		NA	NA
S.punctatus.fa__SPPG_07308T0	S.punctatus.fa	SPPG_07308T0	80		Puf3	Puf3		Puf3		S.cerevisiae.fa__YLL013C	N.crassa.fa__NCU06511T0	Puf3	Puf3	Puf3	Puf3	Puf3	Puf3		8	8	608;643;644;679;680;715;716;751;752;787;788;823;824;859;867;902		56;68;171;190;435;453;488;499;538;555	SRQ	NYQ	CRQ	NHQ	CRQ	NYQ	SNE	NYQ	SRQNYQCRQNHQCRQNYQSNENYQ	24	Puf3			Puf3		SRQNYQCRQNHQCRQNYQSNENYQ	1
S.punctatus.fa__SPPG_06697T0	S.punctatus.fa	SPPG_06697T0	80		Puf6			Puf6		S.cerevisiae.fa__YDR496C	N.crassa.fa__NCU09380T0	Puf6	Puf6	Puf6	Puf6	Puf6	Puf6		4	4	145;180;181;216;217;253;332;367		29;47	SRQ	RFS	AVE	ARQ					SRQRFSAVEARQ	12						NA	NA
S.punctatus.fa__SPPG_07182T0	S.punctatus.fa	SPPG_07182T0	80		Puf8	Puf8		Puf8		NA	N.crassa.fa__NCU01760T0	NA	Puf8	NA	Puf8	Puf8	Puf8		8	8	147;181;182;217;218;253;254;289;294;329;330;365;366;401;410;445			LLQ	NFQ	CHQ	CHQ	SLQ	NWQ	SKE	NYQ	LLQNFQCHQCHQSLQNWQSKENYQ	24		Puf8 - 2 a.a. different		Puf8		NA	NA
C.caseinolytica.fa__105062	C.caseinolytica.fa	105062	81				?	?		NA	NA	NA	NA	NA	NA	NA			3	0	261;296;333;372;373;408		94;107;160;178	SIA	SCY	HTY						SIASCYHTY	9						NA	NA
C.caseinolytica.fa__30887	C.caseinolytica.fa	30887	81		Nop9			Nop9		S.cerevisiae.fa__YJL010C	N.crassa.fa__NCU06118T0	Nop9	Nop9	Nop9	Nop9	Nop9	Nop9		3	1	95;130;174;210;511;548		13;23;188;200;204;219	SKE	SHR	SFD						SKESHRSFD	9						NA	NA
C.caseinolytica.fa__16130	C.caseinolytica.fa	16130	81	possibly missing N and C-terminus, RRM truncated, Puf domain intact	Puf1			Puf1		S.cerevisiae.fa__YJR091C	N.crassa.fa__NCU06199T0	Puf1	Puf1	Puf1	Puf1	Puf1	Puf1		6	6	1;32;33;69;70;104;105;141;143;178;180;215			QKE	TWQ	NYQ	SRR	SLT	PNL			QKETWQNYQSRRSLTPNL	18						NA	NA
C.caseinolytica.fa__20765	C.caseinolytica.fa	20765	81		Puf3	Puf3		Puf3		S.cerevisiae.fa__YLL013C	N.crassa.fa__NCU06511T0	Puf3	Puf3	Puf3	Puf3	Puf3	Puf3		8	8	67;102;103;138;139;174;175;210;211;246;247;282;283;318;327;362		371;385	SRQ	NYQ	CRQ	NHQ	CRQ	NYQ	SNE	NYQ	SRQNYQCRQNHQCRQNYQSNENYQ	24	Puf3			Puf3		SRQNYQCRQNHQCRQNYQSNENYQ	1
C.caseinolytica.fa__22238	C.caseinolytica.fa	22238	81		Puf4	Puf4		Puf4		S.cerevisiae.fa__YGL014W	N.crassa.fa__NCU11956T0	Puf4	Puf4	Puf4	Puf4	Puf4	Puf4		8	8	70;105;106;141;142;178;179;214;215;250;251;286;287;322;325;360			CRQ	NYQ	TRQ	NHQ	CCQ	NYQ	SNE	NYQ	CRQNYQTRQNHQCCQNYQSNENYQ	24	Puf4			Puf4		NA	NA
C.caseinolytica.fa__148426	C.caseinolytica.fa	148426	81		Puf6			Puf6		S.cerevisiae.fa__YDR496C	N.crassa.fa__NCU09380T0	Puf6	Puf6	Puf6	Puf6	Puf6	Puf6		5	5	134;169;170;205;206;242;319;354;355;391		30;39;582;601	SRQ	KYV	VYE	ATS	NVI				SRQKYVVYEATSNVI	15						NA	NA
L.starkeyi.fa__102201	L.starkeyi.fa	102201	82		Nop9			Nop9		S.cerevisiae.fa__YJL010C	N.crassa.fa__NCU06118T0	Nop9	Nop9	Nop9	Nop9	Nop9	Nop9		5	0	91;126;127;162;189;224;272;307;320;355		223;236;290;301;405;414	SKE	SHE	SHR	SPQ	SHE				SKESHESHRSPQSHE	15						NA	NA
L.starkeyi.fa__35641	L.starkeyi.fa	35641	82	possibly missing N and C-terminus, RRM/Puf domains intact	Puf1	Puf1		Puf1		S.cerevisiae.fa__YJR091C	N.crassa.fa__NCU06199T0	Puf1	Puf1	Puf1	Puf1	Puf1	Puf1		6	6	198;233;234;269;271;305;306;342;344;379;381;417	1;69		NTQ	TWQ	NYQ	ARR	ALT	SLL			NTQTWQNYQARRALTSLL	18	Puf1		Puf1 or 2 - has RRM	Puf1		NA	NA
L.starkeyi.fa__607	L.starkeyi.fa	607	82		Puf3	Puf3		Puf3		S.cerevisiae.fa__YLL013C	N.crassa.fa__NCU06511T0	Puf3	Puf3	Puf3	Puf3	Puf3	Puf3		8	8	572;607;608;643;644;679;680;715;716;751;752;787;788;823;831;866		13;25;42;63;71;88;109;143;181;191;314;337;467;479;515;545	SRQ	NYQ	CRQ	NHQ	CRQ	NYQ	SNE	NYQ	SRQNYQCRQNHQCRQNYQSNENYQ	24	Puf3			Puf3		SRQNYQCRQNHQCRQNYQSNENYQ	1
L.starkeyi.fa__47050	L.starkeyi.fa	47050	82	possibly missing N-terminus, Puf domain intact	Puf4	Puf4		Puf4		S.cerevisiae.fa__YGL014W	N.crassa.fa__NCU11956T0	Puf4	Puf4	Puf4	Puf4	Puf4	Puf4		8	8	25;60;61;96;97;133;134;169;170;205;206;241;242;277;280;315		339;357;364;373;394;422;429;447	CRQ	NYQ	TRQ	NHQ	CCQ	NYQ	SNE	NYQ	CRQNYQTRQNHQCCQNYQSNENYQ	24	Puf4			Puf4		NA	NA
L.starkeyi.fa__36141	L.starkeyi.fa	36141	82	possibly missing N-terminus, Puf domain intact	Puf8	Puf8		Puf8		NA	N.crassa.fa__NCU01760T0	NA	Puf8	NA	Puf8	Puf8	Puf8		8	8	58;92;93;128;129;164;165;203;205;240;241;276;277;312;321;356			IFQ	NFQ	CHQ	CHQ	SLQ	NWQ	SKE	NYQ	IFQNFQCHQCHQSLQNWQSKENYQ	24		Puf8 - 2 a.a. different		Puf8		NA	NA
W.anomalus.fa__32165	W.anomalus.fa	32165	83		Nop9			Nop9		S.cerevisiae.fa__YJL010C	N.crassa.fa__NCU06118T0	Nop9	Nop9	Nop9	Nop9	Nop9	Nop9		8	8	91;126;127;162;186;222;271;306;320;355;357;393;496;533;534;571			SKE	SHE	SHR	SPQ	SHE	GSV	SHE	SHD	SKESHESHRSPQSHEGSVSHESHD	24						NA	NA
W.anomalus.fa__91705	W.anomalus.fa	91705	83		Puf1	Puf1		Puf1		S.cerevisiae.fa__YJR091C	N.crassa.fa__NCU06199T0	Puf1	Puf1	Puf1	Puf1	Puf1	Puf1		6	6	573;608;609;644;646;680;681;717;719;754;756;792	358;427	22;59;89;98;137;150;162;175;258;272;431;442;454;470;842;853;888;902;922;938;956;977;995;1011	NTQ	TWQ	NYQ	ARR	ALT	SLL			NTQTWQNYQARRALTSLL	18	Puf1		Puf1 or 2 - has RRM	Puf1		NA	NA
W.anomalus.fa__33404	W.anomalus.fa	33404	83		Puf3	Puf3		Puf3		S.cerevisiae.fa__YLL013C	N.crassa.fa__NCU06511T0	Puf3	Puf3	Puf3	Puf3	Puf3	Puf3		8	8	65;100;101;136;137;172;173;208;209;244;245;280;281;316;331;366		4;42	SRQ	NYQ	CRQ	NHQ	CRQ	NYQ	SNE	NYQ	SRQNYQCRQNHQCRQNYQSNENYQ	24	Puf3			Puf3		SRQNYQCRQNHQCRQNYQSNENYQ	1
W.anomalus.fa__82140	W.anomalus.fa	82140	83	possibly missing N-terminus, Puf domain intact	Puf4	Puf4		Puf4		S.cerevisiae.fa__YGL014W	N.crassa.fa__NCU11956T0	Puf4	Puf4	Puf4	Puf4	Puf4	Puf4		8	8	20;54;55;90;91;127;128;163;164;199;200;235;236;269;273;308			CRQ	NYQ	TRQ	NHQ	CCQ	NYQ	SNE	NYQ	CRQNYQTRQNHQCCQNYQSNENYQ	24	Puf4			Puf4		NA	NA
W.anomalus.fa__31904	W.anomalus.fa	31904	83		Puf5			Puf5		S.cerevisiae.fa__YGL178W	NA	Puf5	NA	NA	NA	Puf5	Puf5		8	8	1;31;32;67;68;104;116;151;154;189;190;228;233;272;273;309		358;363	QKD	NYQ	TRQ	NHQ	CCQ	NYQ	SNE	NYQ	QKDNYQTRQNHQCCQNYQSNENYQ	24						NA	NA
W.anomalus.fa__97667	W.anomalus.fa	97667	83		Puf6			Puf6		S.cerevisiae.fa__YDR496C	N.crassa.fa__NCU09380T0	Puf6	Puf6	Puf6	Puf6	Puf6	Puf6		6	6	157;192;193;228;229;265;342;377;378;415;416;451		15;70;74;92;621;632	SRQ	KYV	AYE	ADC	NLI	RRL			SRQKYVAYEADCNLIRRL	18						NA	NA
M.verticillata.fa__MVEG_02809T0	M.verticillata.fa	MVEG_02809T0	84		Nop9			Nop9		S.cerevisiae.fa__YJL010C	N.crassa.fa__NCU06118T0	Nop9	Nop9	Nop9	Nop9	Nop9	Nop9		6	6	106;141;142;178;294;332;350;386;387;423;571;606		48;59;634;645;705;715;807;835	SLE	SHQ	NPQ	SHE	NYQ	GHD			SLESHQNPQSHENYQGHD	18						NA	NA
M.verticillata.fa__MVEG_05216T0	M.verticillata.fa	MVEG_05216T0	84		Puf1	Puf1 or Puf2		Puf1		S.cerevisiae.fa__YJR091C	N.crassa.fa__NCU06199T0	Puf1	Puf1	Puf1	Puf1	Puf1	Puf1		6	6	813;848;849;884;886;920;921;956;959;994;996;1031	505;575;595;665	6;17;159;190;286;303;373;405;411;423;436;450;1243;1248;1272;1300	NTQ	TWQ	NYQ	ARR	TLT	SLL			NTQTWQNYQARRTLTSLL	18		Puf1 or Puf2	Puf1 or 2 - has RRM	Puf1 or Puf2		NA	NA
M.verticillata.fa__MVEG_06247T0	M.verticillata.fa	MVEG_06247T0	84			Puf3	Puf3	Puf3		NA	NA	NA	NA	NA	NA	NA			8	8	222;257;258;293;294;329;330;365;366;400;401;436;437;472;480;515		149;164	SRQ	NYQ	CRQ	NHQ	CRQ	NYQ	SNE	NYQ	SRQNYQCRQNHQCRQNYQSNENYQ	24	Puf3			Puf3		SRQNYQCRQNHQCRQNYQSNENYQ	1
M.verticillata.fa__MVEG_07987T0	M.verticillata.fa	MVEG_07987T0	84		Puf3	Puf3		Puf3		S.cerevisiae.fa__YLL013C	N.crassa.fa__NCU06511T0	Puf3	Puf3	Puf3	Puf3	Puf3	Puf3		8	8	765;800;801;836;837;872;873;908;909;943;944;979;980;1015;1023;1058		574;582;613;633;643;662;713;726;1099;1120	SRQ	NYQ	CRQ	NHQ	CRQ	NYQ	SNE	NYQ	SRQNYQCRQNHQCRQNYQSNENYQ	24	Puf3			Puf3		SRQNYQCRQNHQCRQNYQSNENYQ	1
M.verticillata.fa__MVEG_04769T0	M.verticillata.fa	MVEG_04769T0	84		Puf4	Puf4		Puf4		S.cerevisiae.fa__YGL014W	N.crassa.fa__NCU11956T0	Puf4	Puf4	Puf4	Puf4	Puf4	Puf4		8	8	522;557;558;593;594;629;631;666;667;702;703;738;739;774;777;812		109;123;124;148;179;192;413;431;483;497;850;995	CRQ	NYQ	TRQ	NHQ	CCQ	NYQ	SNE	NYQ	CRQNYQTRQNHQCCQNYQSNENYQ	24	Puf4			Puf4		NA	NA
M.verticillata.fa__MVEG_07523T0	M.verticillata.fa	MVEG_07523T0	84		Puf6			Puf6		S.cerevisiae.fa__YDR496C	N.crassa.fa__NCU09380T0	Puf6	Puf6	Puf6	Puf6	Puf6	Puf6		6	6	140;175;176;210;211;247;323;358;359;396;397;433		12;28;41;58;114;127;587;606	SRQ	RFV	SEE	AQM	HML	RRL			SRQRFVSEEAQMHMLRRL	18						NA	NA
M.verticillata.fa__MVEG_11407T0	M.verticillata.fa	MVEG_11407T0	84		Puf8	Puf8		Puf8		NA	N.crassa.fa__NCU01760T0	NA	Puf8	NA	Puf8	Puf8	Puf8		8	8	634;668;669;704;705;740;741;779;781;816;817;852;853;888;941;976		10;28;60;79;128;146;251;266;429;449;522;535;595;611;1007;1051	IHQ	NFQ	CHQ	CHQ	SLQ	NWQ	SKE	NYQ	IHQNFQCHQCHQSLQNWQSKENYQ	24		Puf8 - 2 a.a. different		Puf8		NA	NA
S.complicata.fa__4712	S.complicata.fa	4712	85		Nop9			Nop9		S.cerevisiae.fa__YJL010C	N.crassa.fa__NCU06118T0	Nop9	Nop9	Nop9	Nop9	Nop9	Nop9		7	7	107;142;143;177;289;324;345;380;382;418;562;599;600;637		3;19;703;715	SKE	SHE	NPQ	SHE	NFQ	SPE	SHD		SKESHENPQSHENFQSPESHD	21						NA	NA
S.complicata.fa__79085	S.complicata.fa	79085	85		Puf1	Puf1		Puf1		S.cerevisiae.fa__YJR091C	N.crassa.fa__NCU06199T0	Puf1	Puf1	Puf1	Puf1	Puf1	Puf1		6	6	583;618;619;655;656;690;691;727;729;764;766;802	365;434	50;64;150;163;345;360;442;453;461;471;477;490;948;1004;1026;1057	NTQ	TWQ	NYQ	ARR	ALT	SLL			NTQTWQNYQARRALTSLL	18	Puf1		Puf1 or 2 - has RRM	Puf1		NA	NA
S.complicata.fa__94554	S.complicata.fa	94554	85		Puf3	Puf3		Puf3		S.cerevisiae.fa__YLL013C	N.crassa.fa__NCU06511T0	Puf3	Puf3	Puf3	Puf3	Puf3	Puf3		8	8	21;56;57;92;93;128;129;164;165;198;199;234;235;270;278;313		345;357;360;378;379;390	SRQ	NYQ	CRQ	NHQ	CRQ	NYQ	SNE	NYQ	SRQNYQCRQNHQCRQNYQSNENYQ	24	Puf3			Puf3		SRQNYQCRQNHQCRQNYQSNENYQ	1
S.complicata.fa__71130	S.complicata.fa	71130	85		Puf4	Puf4		Puf4		S.cerevisiae.fa__YGL014W	N.crassa.fa__NCU11956T0	Puf4	Puf4	Puf4	Puf4	Puf4	Puf4		8	8	597;632;633;668;669;705;706;741;750;785;786;821;822;857;860;895		10;20;267;276;326;336;350;360;368;385;473;484;500;537;567;579	CRQ	NYQ	TRQ	NHQ	CCQ	NYQ	SNE	NYQ	CRQNYQTRQNHQCCQNYQSNENYQ	24	Puf4			Puf4		NA	NA
S.complicata.fa__21638	S.complicata.fa	21638	85		Puf6			Puf6		S.cerevisiae.fa__YDR496C	N.crassa.fa__NCU09380T0	Puf6	Puf6	Puf6	Puf6	Puf6	Puf6		6	6	143;178;179;214;215;251;329;364;365;401;403;439		32;54;64;76;587;604;614;625	SRQ	KYI	AYE	SDM	CLC	RRL			SRQKYIAYESDMCLCRRL	18						NA	NA
S.complicata.fa__71263	S.complicata.fa	71263	85		Puf8	Puf8		Puf8		NA	N.crassa.fa__NCU01760T0	NA	Puf8	NA	Puf8	Puf8	Puf8		8	8	423;458;459;494;495;530;531;569;571;606;607;642;643;678;687;722		229;241;266;284;298;309;333;347	SIQ	NFQ	CHQ	CHQ	SLQ	NWQ	SKE	NYQ	SIQNFQCHQCHQSLQNWQSKENYQ	24	Puf8			Puf8		NA	NA

## Sheet: Missing Pufs
U. maydis	Puf3 found in genome sequence at contig_1_14 : 1-2836	matches to RNA-contacting residues all found in correct order in genome sequence	AUGUSTUS predicted intact Puf RNA binding domain, but N-terminus is likely chopped off due to incomplete contig
